# Supplementary material for: Selectfluor-mediated highly selective radical dioxygenation of alkenes
Source: Royal Society of Chemistry journal article supplement (doi:10.1039/c6ra16266e), 2016-01-01

## Supplementary Information

For

### Selectfluor-Mediated Highly Selective Radical Dioxygenation of Alkenes

Yunhe Lv,\* Xin Wang, Hao Cui, Kai Sun, Weiya Pu, Gang Li, Yingtao Wu, Jialin He, and  
Xiaoran Ren

College of Chemistry and Chemical Engineering, Anyang Normal University,

436 Xian'ge Road, Anyang City, Henan 455000, China

lvyunhe0217@163.com

## Table of Contents

|                                                                             |            |
|-----------------------------------------------------------------------------|------------|
| <b>I . General Considerations</b>                                           | <b>S2</b>  |
| <b>II . General procedure for the preparation of 3 and 4</b>                | <b>S2</b>  |
| <b>III . Control experiment on the reaction mechanism</b>                   | <b>S3</b>  |
| <b>IV . Analytical data of Compounds 3, 4 and 5</b>                         | <b>S4</b>  |
| <b>V . <sup>1</sup>H and <sup>13</sup>C Spectra of Compounds 3, 4 and 5</b> | <b>S17</b> |

## I. General Considerations

All reagents were purchased from commercial sources and used without further treatment, unless otherwise indicated. All reactions were run under air with no precautions taken to exclude moisture.  $^1\text{H}$  NMR and  $^{13}\text{C}$  NMR spectra were recorded at 25 °C on a Varian (400 MHz and 100 MHz). Melting points were obtained with a micro melting point XT4A Beijing Keyi electrooptic apparatus and are uncorrected. High resolution mass spectra were recorded on Bruck microtof. All reactions were monitored by TLC with Taizhou GF254 silica gel coated plates. Flash column chromatography was carried out using 200-300 mesh silica gel at increased pressure.

## II. General procedure for the preparation of 3 and 4

### 3a as an example

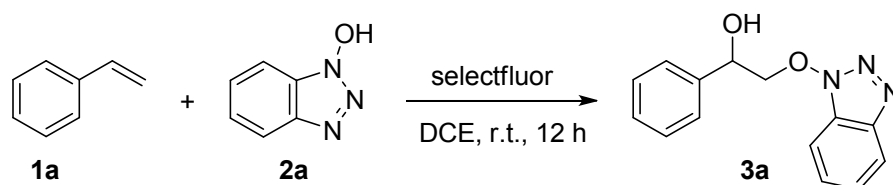

To a solution of the 1H-benzo[d][1,2,3]triazol-1-ol **2a** (40.5 mg, 0.3 mmol) in 1, 2-dichloroethane (DCE, 3.0 ml) was added the styrene **1a** (41  $\mu\text{L}$ , 0.36 mmol) and selectfluor (106.2 mg, 0.3 mmol). The mixture was then stirred for 12 h at room temperature in air. After the reaction was finished, the resulting mixture was quenched with water (5.0 mL) and extracted with EtOAc ( $3 \times 5.0$  mL). The combined organic phases were dried over anhydrous  $\text{Na}_2\text{SO}_4$  and the solvent was evaporated under vacuum. The residue was purified by column chromatography to give the corresponding products **3a** (71.1 mg, 93%).

### 4a as an example

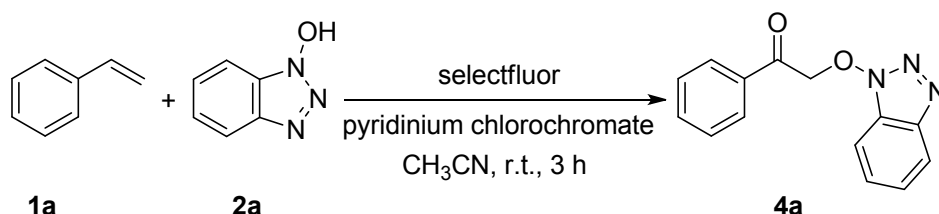

To a solution of the 1H-benzo[d][1,2,3]triazol-1-ol **2a** (40.5 mg, 0.3 mmol) in  $\text{CH}_3\text{CN}$  (3.0 ml) was added the styrene **1a** (41  $\mu\text{L}$ , 0.36 mmol), selectfluor (106.2 mg, 0.3 mmol) and pyridinium chlorochromate (64.7 mg, 0.3 mmol). The mixture was then stirred for 3 h at room temperature in air. After the reaction was finished, the resulting mixture was quenched with water (5.0 mL) and extracted with EtOAc ( $3 \times 5.0$  mL). The combined organic phases were dried over anhydrous

Na<sub>2</sub>SO<sub>4</sub> and the solvent was evaporated under vacuum. The residue was purified by column chromatography to give the corresponding products **4a** (54.6 mg, 72%).

### III. Control experiment on the reaction mechanism

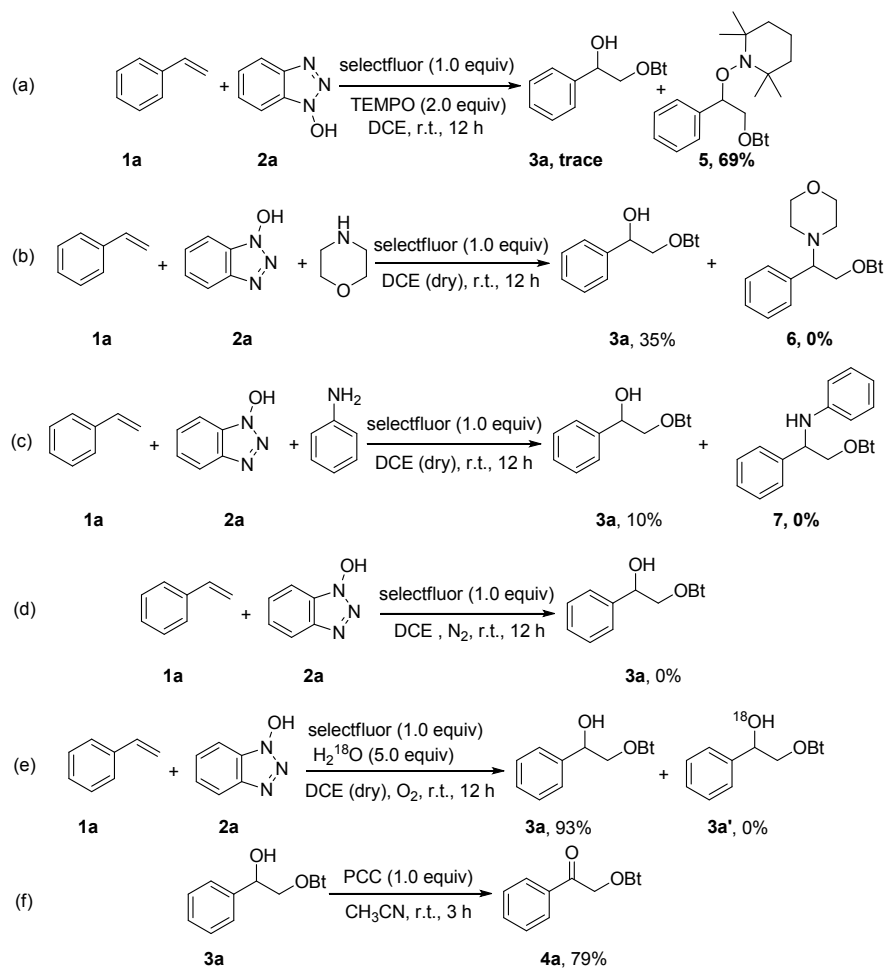

HRMS Spectra of <sup>16</sup>O-**3a**

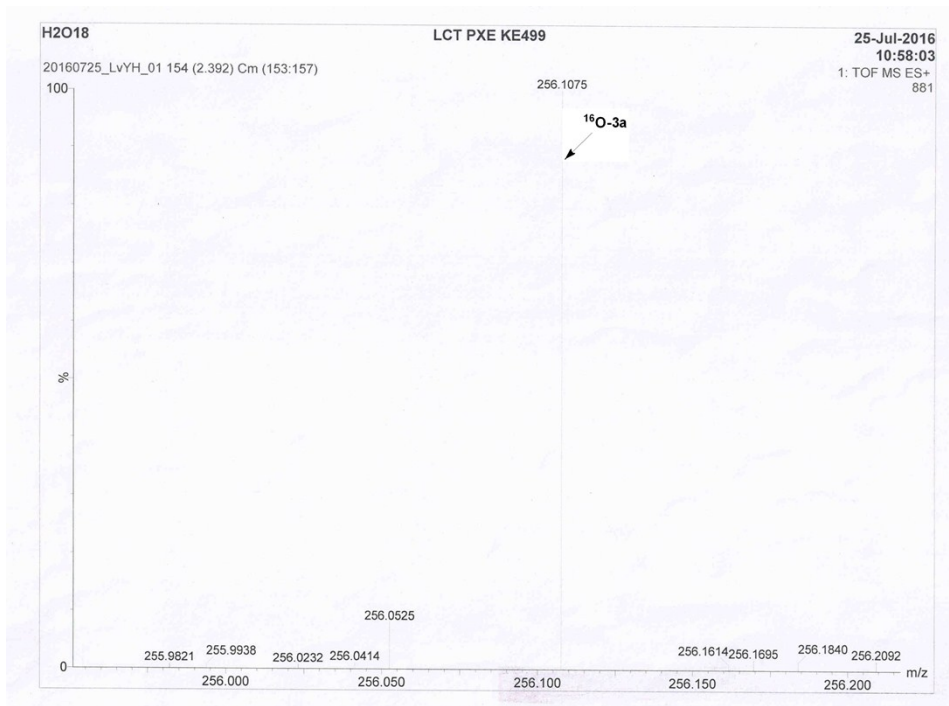

#### IV. Analytical data of Compounds 3, 4 and 5

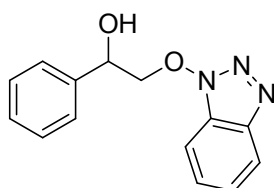

##### 2-((1*H*-benzo[*d*][1,2,3]triazol-1-yl)oxy)-1-phenylethanol 3a

Colorless oil.  $^1\text{H NMR}$  (400 MHz;  $\text{CDCl}_3$ ):  $\delta$  = 4.78-4.85 (m, 2H), 5.42 (dd,  $J_1$  = 4.8 Hz,  $J_2$  = 6.8 Hz, 1H), 7.31-7.37 (m, 6H), 7.43-7.47 (m, 1H), 7.58 (dd,  $J_1$  = 0.8 Hz,  $J_2$  = 8.4 Hz, 1H), 7.92 (d,  $J$  = 8.4 Hz, 1H), 10.33 (s, 1H);  $^{13}\text{C NMR}$  (100 MHz,  $\text{CDCl}_3$ ):  $\delta$  = 80.2, 84.2, 109.0, 119.8, 124.9, 127.2, 127.3, 128.2, 128.7, 128.9, 135.5, 143.0. HRMS (ESI-TOF) Calcd for  $\text{C}_{14}\text{H}_{14}\text{N}_3\text{O}_2$ ,  $[\text{M}+\text{H}]^+$   $m/z$  256.1086; Found 256.1088.

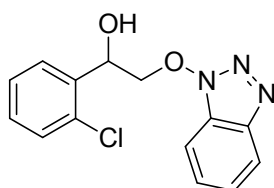

##### 2-((1*H*-benzo[*d*][1,2,3]triazol-1-yl)oxy)-1-(2-chlorophenyl)ethanol 3b

Colorless oil.  $^1\text{H NMR}$  (400 MHz;  $\text{CDCl}_3$ ):  $\delta$  = 4.66 (dd,  $J_1$  = 8.0 Hz,  $J_2$  = 11.6 Hz, 1H), 4.84 (dd,  $J_1$  = 2.0 Hz,  $J_2$  = 11.6 Hz, 1H), 5.91 (dd,  $J_1$  = 2.4 Hz,  $J_2$  = 8.0 Hz, 1H), 7.28-7.34 (m, 2H), 7.36-7.41 (m, 2H), 7.50-7.53 (m, 1H), 7.58-7.64 (m, 2H), 8.00 (d,  $J$  = 8.4 Hz, 1H), 9.55 (s, 1H);  $^{13}\text{C NMR}$  (100 MHz,  $\text{CDCl}_3$ ):  $\delta$  = 79.1, 81.8, 108.8, 120.2, 124.9, 127.3, 127.4, 128.0, 128.3, 129.9, 130.0, 132.8, 133.0, 143.3. HRMS (ESI-TOF) Calcd for  $\text{C}_{14}\text{H}_{13}\text{ClN}_3\text{O}_2$ ,  $[\text{M}+\text{H}]^+$   $m/z$  290.0696; Found 290.0690.

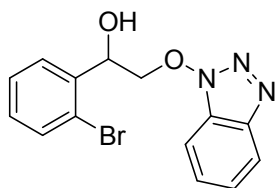

**2-((1H-benzo[d][1,2,3]triazol-1-yl)oxy)-1-(2-bromophenyl)ethanol 3c**

Colorless oil.  $^1\text{H NMR}$  (400 MHz;  $\text{CDCl}_3$ ):  $\delta$  = 4.62 (dd,  $J_1$  = 8.4 Hz,  $J_2$  = 12.0 Hz, 1H), 4.82 (dd,  $J_1$  = 2.4 Hz,  $J_2$  = 12.0 Hz, 1H), 5.86 (dd,  $J_1$  = 2.4 Hz,  $J_2$  = 8.0 Hz, 1H), 7.20 (t,  $J$  = 7.6 Hz, 1H), 7.34-7.41 (m, 2H), 7.51 (d,  $J$  = 8.0 Hz, 1H), 7.54 (d,  $J$  = 8.0 Hz, 1H), 7.59 (d,  $J$  = 8.0 Hz, 1H), 7.65 (d,  $J$  = 8.4 Hz, 1H), 8.00 (d,  $J$  = 8.4 Hz, 1H), 9.65 (s, 1H);  $^{13}\text{C NMR}$  (100 MHz,  $\text{CDCl}_3$ ):  $\delta$  = 79.2, 83.9, 108.9, 120.2, 122.7, 124.9, 127.5, 127.9, 128.1, 128.4, 130.3, 133.2, 134.6, 143.3. HRMS (ESI-TOF) Calcd for  $\text{C}_{14}\text{H}_{13}\text{BrN}_3\text{O}_2$ ,  $[\text{M}+\text{H}]^+$   $m/z$  334.0191; Found 334.0189.

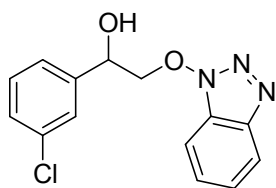

**2-((1H-benzo[d][1,2,3]triazol-1-yl)oxy)-1-(3-chlorophenyl)ethanol 3d**

Colorless oil.  $^1\text{H NMR}$  (400 MHz;  $\text{CDCl}_3$ ):  $\delta$  = 4.79 (d,  $J$  = 5.6 Hz, 2H), 5.41 (d,  $J$  = 5.6 Hz, 1H), 7.27-7.29 (m, 3H), 7.36 (d,  $J$  = 7.6 Hz, 1H), 7.39 (d,  $J$  = 8.0 Hz, 1H), 7.49 (t,  $J$  = 7.6 Hz, 1H), 7.59 (d,  $J$  = 8.0 Hz, 1H), 7.94 (d,  $J$  = 8.4 Hz, 1H), 10.18 (s, 1H);  $^{13}\text{C NMR}$  (100 MHz,  $\text{CDCl}_3$ ):  $\delta$  = 79.9, 83.7, 108.9, 119.9, 125.0, 125.3, 127.3, 128.4, 129.2, 130.1, 134.7, 137.6, 143.1. HRMS (ESI-TOF) Calcd for  $\text{C}_{14}\text{H}_{13}\text{ClN}_3\text{O}_2$ ,  $[\text{M}+\text{H}]^+$   $m/z$  290.0696; Found 290.0689.

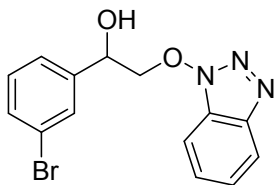

**2-((1H-benzo[d][1,2,3]triazol-1-yl)oxy)-1-(3-bromophenyl)ethanol 3e**

Colorless oil.  $^1\text{H NMR}$  (400 MHz;  $\text{CDCl}_3$ ):  $\delta$  = 4.78-4.80 (m, 2H), 5.40 (dd,  $J_1$  = 4.8 Hz,  $J_2$  = 6.8 Hz, 1H), 7.27 (t,  $J$  = 8.0 Hz, 1H), 7.34 (d,  $J$  = 7.6 Hz, 1H), 7.38-7.42 (m, 1H), 7.49-7.55 (m, 2H), 7.57 (s, 1H), 7.61 (d,  $J$  = 8.4 Hz, 1H), 8.01 (d,  $J$  = 8.4 Hz, 1H), 9.23 (s, 1H);  $^{13}\text{C NMR}$  (100 MHz,  $\text{CDCl}_3$ ):  $\delta$  = 79.8, 83.8, 108.9, 120.2, 123.0, 125.0, 125.8, 127.4, 128.4, 130.2, 130.5, 132.3, 137.7, 143.3. HRMS (ESI-TOF) Calcd for  $\text{C}_{14}\text{H}_{13}\text{BrN}_3\text{O}_2$ ,  $[\text{M}+\text{H}]^+$   $m/z$  334.0191; Found 334.0187.

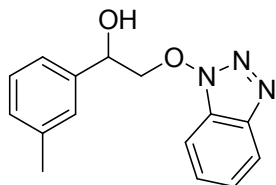

**2-((1H-benzo[d][1,2,3]triazol-1-yl)oxy)-1-(m-tolyl)ethanol 3f**

Colorless oil.  $^1\text{H NMR}$  (400 MHz;  $\text{CDCl}_3$ ):  $\delta$  = 2.34 (s, 3H), 4.80 (d,  $J$  = 6.0 Hz, 2H), 5.39 (t,  $J$  = 6.0 Hz, 1H), 7.18 (d,  $J$  = 10.8 Hz, 3H), 7.27 (t,  $J$  = 7.6 Hz, 1H), 7.39 (t,  $J$  = 7.6 Hz, 1H), 7.51 (t,  $J$  = 7.6 Hz, 1H), 7.63 (d,  $J$  = 8.4 Hz, 1H), 7.99 (d,  $J$  = 8.4 Hz, 1H), 9.12 (s, 1H);  $^{13}\text{C NMR}$  (100 MHz,  $\text{CDCl}_3$ ):  $\delta$  = 21.3, 80.2, 84.5, 109.0, 120.1, 124.2, 124.9, 127.5, 127.8, 128.3, 128.8, 130.0,

135.2, 138.7, 143.3. HRMS (ESI-TOF) Calcd for C<sub>15</sub>H<sub>16</sub>N<sub>3</sub>O<sub>2</sub>, [M+H]<sup>+</sup> *m/z* 270.1243; Found 270.1249.

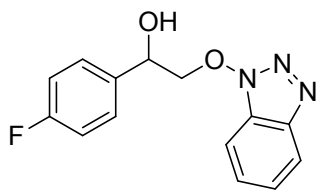

**2-((1H-benzo[d][1,2,3]triazol-1-yl)oxy)-1-(4-fluorophenyl)ethanol 3g**

Colorless oil. <sup>1</sup>H NMR (400 MHz; CDCl<sub>3</sub>): δ = 4.80-4.82 (m, 2H), 5.40-5.43 (m, 1H), 7.06-7.10 (m, 2H), 7.37-7.41 (m, 3H), 7.50-7.54 (m, 1H), 7.61 (d, *J* = 8.4 Hz, 1H), 8.00 (d, *J* = 8.4 Hz, 1H), 9.17 (s, 1H); <sup>13</sup>C NMR (100 MHz, CDCl<sub>3</sub>): δ = 79.9, 83.8, 108.9, 115.8, 116.0, 120.2, 125.0, 127.4, 128.4, 129.1, 129.2, 131.2, 131.2, 143.3, 161.9, 164.4. HRMS (ESI-TOF) Calcd for C<sub>13</sub>H<sub>14</sub>FN<sub>3</sub>O<sub>2</sub>, [M+H]<sup>+</sup> *m/z* 274.0992; Found 274.0985.

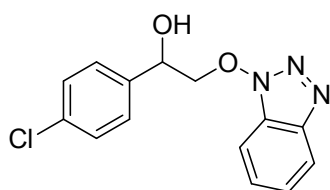

**2-((1H-benzo[d][1,2,3]triazol-1-yl)oxy)-1-(4-chlorophenyl)ethanol 3h**

White solid. mp: 86-87 °C <sup>1</sup>H NMR (400 MHz; CDCl<sub>3</sub>): δ = 4.80 (d, *J* = 5.6 Hz, 2H), 5.41 (t, *J* = 5.6 Hz, 1H), 7.34-7.42 (m, 5H), 7.51-7.56 (m, 1H), 7.60 (d, *J* = 8.4 Hz, 1H), 7.99 (d, *J* = 8.4 Hz, 1H), 9.20 (s, 1H); <sup>13</sup>C NMR (100 MHz, CDCl<sub>3</sub>): δ = 79.8, 83.8, 108.9, 120.2, 125.0, 127.4, 128.4, 128.6, 129.1, 133.9, 135.2, 143.3. HRMS (ESI-TOF) Calcd for C<sub>13</sub>H<sub>14</sub>ClN<sub>3</sub>O<sub>2</sub>, [M+H]<sup>+</sup> *m/z* 290.0696; Found 290.0688.

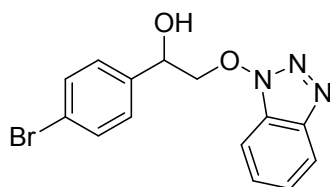

**2-((1H-benzo[d][1,2,3]triazol-1-yl)oxy)-1-(4-bromophenyl)ethanol 3i**

Colorless oil. <sup>1</sup>H NMR (400 MHz; CDCl<sub>3</sub>): δ = 4.79 (d, *J* = 6.0 Hz, 2H), 5.39 (t, *J* = 5.6 Hz, 1H), 7.29 (d, *J* = 8.4 Hz, 2H), 7.37-7.42 (m, 1H), 7.50-7.54 (m, 3H), 7.59 (d, *J* = 8.4 Hz, 1H), 7.99 (d, *J* = 8.4 Hz, 1H), 9.30 (s, 1H); <sup>13</sup>C NMR (100 MHz, CDCl<sub>3</sub>): δ = 79.7, 83.8, 108.9, 120.2, 123.3, 125.0, 127.4, 128.4, 128.9, 132.1, 134.4, 143.3. HRMS (ESI-TOF) Calcd for C<sub>13</sub>H<sub>14</sub>BrN<sub>3</sub>O<sub>2</sub>, [M+H]<sup>+</sup> *m/z* 334.0191; Found 334.0189.

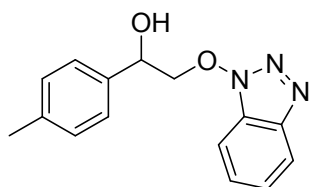

**2-((1H-benzo[d][1,2,3]triazol-1-yl)oxy)-1-(p-tolyl)ethanol 3j**

White solid. mp: 104-105 °C <sup>1</sup>H NMR (400 MHz; CDCl<sub>3</sub>): δ = 2.34 (s, 3H), 4.81 (d, *J* = 4.0 Hz, 2H), 5.38 (dd, *J*<sub>1</sub> = 4.8 Hz, *J*<sub>2</sub> = 6.8 Hz, 1H), 7.18 (d, *J* = 8.0 Hz, 2H), 7.27 (d, *J* = 8.0 Hz, 2H), 7.37 (dd, *J*<sub>1</sub> = 7.2 Hz, *J*<sub>2</sub> = 8.0 Hz, 1H), 7.50 (t, *J* = 7.6 Hz, 1H), 7.63 (d, *J* = 8.4 Hz, 1H), 7.97 (d,

$J = 8.4$  Hz, 1H), 9.35 (s, 1H);  $^{13}\text{C}$  NMR (100 MHz,  $\text{CDCl}_3$ ):  $\delta = 21.1, 80.2, 84.1, 109.0, 119.9, 124.9, 127.2, 127.4, 128.2, 129.4, 132.3, 138.9, 143.1$ . HRMS (ESI-TOF) Calcd for  $\text{C}_{15}\text{H}_{16}\text{N}_3\text{O}_2$ ,  $[\text{M}+\text{H}]^+ m/z$  270.1243; Found 270.1240.

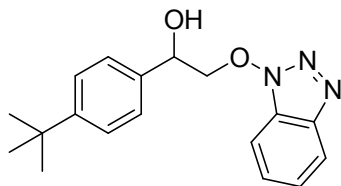

**2-((1H-benzo[d][1,2,3]triazol-1-yl)oxy)-1-(4-(tert-butyl)phenyl)ethanol 3k**

Colorless oil.  $^1\text{H}$  NMR (400 MHz;  $\text{CDCl}_3$ ):  $\delta = 1.30$  (s, 9H), 4.83 (t,  $J = 7.6$  Hz, 2H), 5.41 (dd,  $J_1 = 4.4$  Hz,  $J_2 = 6.8$  Hz, 1H), 7.32 (d,  $J = 8.4$  Hz, 2H), 7.35 (d,  $J = 7.6$  Hz, 1H), 7.39 (d,  $J = 8.4$  Hz, 2H), 7.48 (t,  $J = 7.6$  Hz, 1H), 7.60 (d,  $J = 8.4$  Hz, 1H), 7.96 (d,  $J = 8.4$  Hz, 1H), 9.44 (s, 1H);  $^{13}\text{C}$  NMR (100 MHz,  $\text{CDCl}_3$ ):  $\delta = 31.2, 34.6, 80.2, 84.2, 109.0, 120.0, 124.8, 125.8, 127.0, 127.4, 128.2, 132.3, 143.2, 152.3$ . HRMS (ESI-TOF) Calcd for  $\text{C}_{18}\text{H}_{22}\text{N}_3\text{O}_2$ ,  $[\text{M}+\text{H}]^+ m/z$  312.1712; Found 312.1719.

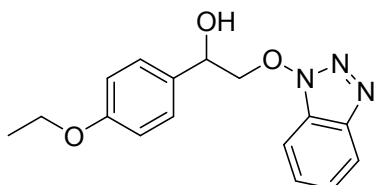

**2-((1H-benzo[d][1,2,3]triazol-1-yl)oxy)-1-(4-ethoxyphenyl)ethanol 3l**

White solid. mp: 109-110 °C  $^1\text{H}$  NMR (400 MHz;  $\text{CDCl}_3$ ):  $\delta = 1.38$  (t,  $J = 6.8$  Hz, 3H), 3.99 (q,  $J = 6.8$  Hz, 2H), 4.76-4.86 (m, 2H), 5.34 (dd,  $J_1 = 4.0$  Hz,  $J_2 = 7.6$  Hz, 1H), 6.85 (d,  $J = 8.4$  Hz, 2H), 7.28 (d,  $J = 8.8$  Hz, 2H), 7.33-7.37 (m, 1H), 7.48 (t,  $J = 7.6$  Hz, 1H), 7.61 (d,  $J = 8.0$  Hz, 1H), 7.95 (d,  $J = 8.4$  Hz, 1H), 9.66 (s, 1H);  $^{13}\text{C}$  NMR (100 MHz,  $\text{CDCl}_3$ ):  $\delta = 14.7, 63.5, 80.1, 83.9, 109.0, 114.7, 119.9, 124.9, 127.1, 127.4, 128.2, 128.7, 143.2, 159.5$ . HRMS (ESI-TOF) Calcd for  $\text{C}_{16}\text{H}_{18}\text{N}_3\text{O}_3$ ,  $[\text{M}+\text{H}]^+ m/z$  300.1348; Found 300.1340.

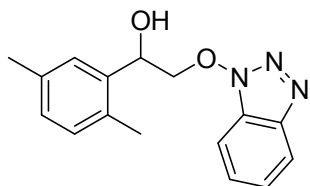

**2-((1H-benzo[d][1,2,3]triazol-1-yl)oxy)-1-(2,5-dimethylphenyl)ethanol 3m**

White solid. mp: 131-132 °C  $^1\text{H}$  NMR (400 MHz;  $\text{CDCl}_3$ ):  $\delta = 2.24$  (s, 3H), 2.31 (s, 3H), 4.74 (d,  $J = 5.6$  Hz, 2H), 5.67 (t,  $J = 5.6$  Hz, 1H), 7.07 (s, 2H), 7.20 (s, 1H), 7.41 (t,  $J = 7.6$  Hz, 1H), 7.54 (t,  $J = 7.6$  Hz, 1H), 7.66 (d,  $J = 8.4$  Hz, 1H), 8.02 (d,  $J = 8.4$  Hz, 1H), 8.72 (s, 1H);  $^{13}\text{C}$  NMR (100 MHz,  $\text{CDCl}_3$ ):  $\delta = 18.4, 21.0, 80.0, 81.5, 109.0, 120.2, 124.8, 126.7, 127.5, 128.3, 129.7, 131.0, 133.0, 133.0, 136.1, 143.4$ . HRMS (ESI-TOF) Calcd for  $\text{C}_{16}\text{H}_{18}\text{N}_3\text{O}_2$ ,  $[\text{M}+\text{H}]^+ m/z$  284.1399; Found 284.1391.

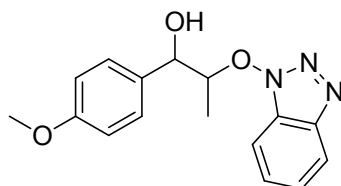

**2-((1H-benzo[d][1,2,3]triazol-1-yl)oxy)-1-(4-methoxyphenyl)propan-1-ol 3n**

Colorless oil. <sup>1</sup>H NMR (400 MHz; CDCl<sub>3</sub>): δ = 1.25 (d, *J* = 6.4 Hz, 0.75H), 1.40 (d, *J* = 6.4 Hz, 3H), 3.78 (s, 0.75H), 3.79 (s, 3H), 4.87-4.94 (m, 0.25H), 5.08-5.12 (m, 1H), 5.14 (d, *J* = 3.6 Hz, 1H), 5.25 (d, *J* = 7.6 Hz, 0.25H), 6.89 (t, *J* = 4.0 Hz, 2.50H), 7.29-7.34 (m, 1.25H), 7.36-7.39 (m, 2.50H), 7.43-7.48 (m, 1.25H), 7.53 (d, *J* = 8.4 Hz, 1H), 7.68 (d, *J* = 8.4 Hz, 0.25H), 7.95 (d, *J* = 8.4 Hz, 1.25H), 9.65 (s, 0.25H), 9.90 (s, 1H); <sup>13</sup>C NMR (100 MHz, CDCl<sub>3</sub>): δ = 14.8, 16.4, 55.2, 87.3, 87.4, 87.5, 88.7, 109.2, 109.4, 114.0, 114.1, 119.9, 124.7, 124.8, 127.1, 128.0, 128.1, 128.1, 128.2, 128.3, 129.0, 129.3, 143.1, 159.9, 160.0. HRMS (ESI-TOF) Calcd for C<sub>16</sub>H<sub>18</sub>N<sub>3</sub>O<sub>3</sub>, [M+H]<sup>+</sup> *m/z* 300.1348; Found 300.1340.

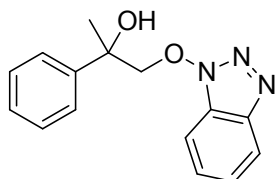**1-((1H-benzo[d][1,2,3]triazol-1-yl)oxy)-2-phenylpropan-2-ol 3o**

Colorless oil. <sup>1</sup>H NMR (400 MHz; CDCl<sub>3</sub>): δ = 1.85 (s, 3H), 4.95 (dd, *J*<sub>1</sub> = 10.4 Hz, *J*<sub>2</sub> = 14.0 Hz, 2H), 7.32-7.42 (m, 4H), 7.44-7.48 (m, 1H), 7.50-7.53 (m, 3H), 7.97 (d, *J* = 8.4 Hz, 1H), 9.10 (s, 1H); <sup>13</sup>C NMR (100 MHz, CDCl<sub>3</sub>): δ = 21.9, 82.5, 84.5, 109.0, 120.1, 124.8, 125.6, 127.1, 128.1, 128.2, 128.7, 140.1, 143.3. HRMS (ESI-TOF) Calcd for C<sub>15</sub>H<sub>16</sub>N<sub>3</sub>O<sub>2</sub>, [M+H]<sup>+</sup> *m/z* 270.1243; Found 270.1240.

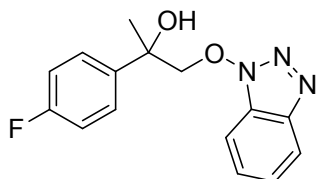**1-((1H-benzo[d][1,2,3]triazol-1-yl)oxy)-2-(4-fluorophenyl)propan-2-ol 3p**

Colorless oil. <sup>1</sup>H NMR (400 MHz; CDCl<sub>3</sub>): δ = 1.83 (s, 3H), 4.90 (dd, *J*<sub>1</sub> = 10.4 Hz, *J*<sub>2</sub> = 16.0 Hz, 2H), 7.05 (d, *J* = 8.8 Hz, 2H), 7.33-7.36 (m, 1H), 7.43-7.52 (m, 4H), 7.94 (d, *J* = 9.2 Hz, 1H), 9.79 (s, 1H); <sup>13</sup>C NMR (100 MHz, CDCl<sub>3</sub>): δ = 21.8, 82.5, 83.9, 108.9, 115.3, 115.5, 119.9, 124.9, 127.0, 127.5, 127.6, 128.2, 136.0, 136.0, 143.1, 161.1, 163.6. HRMS (ESI-TOF) Calcd for C<sub>15</sub>H<sub>15</sub>FN<sub>3</sub>O<sub>2</sub>, [M+H]<sup>+</sup> *m/z* 288.1148; Found 288.1141.

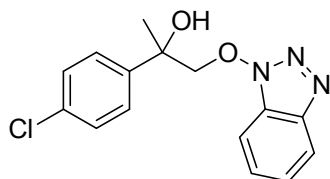**1-((1H-benzo[d][1,2,3]triazol-1-yl)oxy)-2-(4-chlorophenyl)propan-2-ol 3q**

Colorless oil. <sup>1</sup>H NMR (400 MHz; CDCl<sub>3</sub>): δ = 1.81 (s, 3H), 4.91 (dd, *J*<sub>1</sub> = 10.4 Hz, *J*<sub>2</sub> = 18.0 Hz, 2H), 7.35-7.39 (m, 3H), 7.45-7.52 (m, 4H), 7.97 (d, *J* = 8.4 Hz, 1H), 9.29 (s, 1H); <sup>13</sup>C NMR (100 MHz, CDCl<sub>3</sub>): δ = 21.9, 82.2, 84.1, 108.9, 120.1, 124.9, 127.0, 127.1, 128.3, 128.8, 134.2, 138.7, 143.3. HRMS (ESI-TOF) Calcd for C<sub>15</sub>H<sub>15</sub>ClN<sub>3</sub>O<sub>2</sub>, [M+H]<sup>+</sup> *m/z* 304.0853; Found 304.0859.



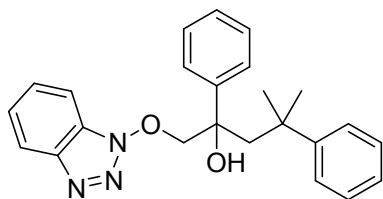

**1-((1*H*-benzo[*d*][1,2,3]triazol-1-yl)oxy)-4-methyl-2,4-diphenylpentan-2-ol 3r**

Colorless oil. <sup>1</sup>H NMR (400 MHz; CDCl<sub>3</sub>): δ = 1.13 (s, 3H), 1.25 (s, 3H), 2.51 (s, 2H), 4.71 (dd, *J*<sub>1</sub> = 10.4 Hz, *J*<sub>2</sub> = 34 Hz, 2H), 7.15-7.25 (m, 3H), 7.27-7.30 (m, 6H), 7.32-7.45 (m, 4H), 7.95 (d, *J* = 8.4 Hz, 1H), 8.08 (s, 1H); <sup>13</sup>C NMR (100 MHz, CDCl<sub>3</sub>): δ = 30.1, 30.7, 37.4, 47.6, 81.5, 86.9, 109.1, 120.1, 124.7, 125.9, 126.0, 127.2, 127.7, 127.9, 128.2, 128.3, 138.8, 143.3, 148.5. HRMS (ESI-TOF) Calcd for C<sub>24</sub>H<sub>26</sub>N<sub>3</sub>O<sub>2</sub>, [M+H]<sup>+</sup> *m/z* 388.2025; Found 388.2028.

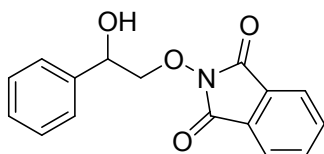

**2-(2-hydroxy-2-phenylethoxy)isoindoline-1,3-dione 3s**

Colorless oil. <sup>1</sup>H NMR (400 MHz; CDCl<sub>3</sub>): δ = 4.46-4.53 (m, 2H), 5.40-5.45 (m, 1H), 7.32-7.41 (m, 5H), 7.76 (q, *J* = 2.8 Hz, 2H), 7.84-7.86 (m, 2H), 9.56 (s, 1H); <sup>13</sup>C NMR (100 MHz, CDCl<sub>3</sub>): δ = 78.9, 85.4, 123.8, 127.1, 128.7, 128.7, 128.8, 134.7, 135.7, 163.8. HRMS (ESI-TOF) Calcd for C<sub>16</sub>H<sub>14</sub>NO<sub>4</sub>, [M+H]<sup>+</sup> *m/z* 284.0923; Found 284.0920.

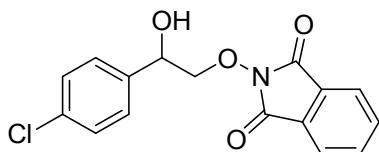

**2-(2-(4-chlorophenyl)-2-hydroxyethoxy)isoindoline-1,3-dione 3t**

White solid. mp: 83-84 °C <sup>1</sup>H NMR (400 MHz; CDCl<sub>3</sub>): δ = 4.43-4.50 (m, 2H), 5.37 (q, *J* = 3.6 Hz, 1H), 7.34 (s, 4H), 7.77 (dd, *J*<sub>1</sub> = 3.2 Hz, *J*<sub>2</sub> = 5.2 Hz, 2H), 7.84-7.86 (m, 2H), 9.60 (s, 1H); <sup>13</sup>C NMR (100 MHz, CDCl<sub>3</sub>): δ = 78.5, 84.6, 123.8, 128.5, 128.6, 128.9, 134.2, 134.8, 163.7. HRMS (ESI-TOF) Calcd for C<sub>16</sub>H<sub>13</sub>ClNO<sub>4</sub>, [M+H]<sup>+</sup> *m/z* 318.0533; Found 318.0537.

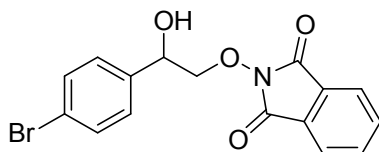

**2-(2-(4-bromophenyl)-2-hydroxyethoxy)isoindoline-1,3-dione 3u**

White solid. mp: 87-89 °C <sup>1</sup>H NMR (400 MHz; CDCl<sub>3</sub>): δ = 4.43-4.53 (m, 2H), 5.35-5.38 (m, 1H), 7.30 (d, *J* = 8.4 Hz, 2H), 7.51 (d, *J* = 8.4 Hz, 2H), 7.78-7.80 (m, 2H), 7.86-7.88 (m, 2H), 9.51 (s, 1H); <sup>13</sup>C NMR (100 MHz, CDCl<sub>3</sub>): δ = 78.5, 84.8, 123.0, 123.9, 128.7, 128.8, 131.9, 134.8, 134.8, 163.8. HRMS (ESI-TOF) Calcd for C<sub>16</sub>H<sub>13</sub>BrNO<sub>4</sub>, [M+H]<sup>+</sup> *m/z* 362.0068; Found 362.0074.

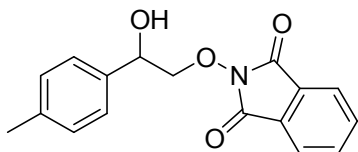

**2-(2-hydroxy-2-(*p*-tolyl)ethoxy)isoindoline-1,3-dione 3v**

White solid. mp: 164-166 °C <sup>1</sup>H NMR (400 MHz; CDCl<sub>3</sub>): δ = 2.32 (s, 3H), 4.49 (d, *J* = 6.0 Hz,

2H), 5.37 (t,  $J = 6.0$  Hz, 1H), 7.16 (d,  $J = 8.0$  Hz, 2H), 7.28 (d,  $J = 8.0$  Hz, 2H), 7.75-7.78 (m, 2H), 7.82-7.85 (m, 2H), 9.53 (s, 1H);  $^{13}\text{C}$  NMR (100 MHz,  $\text{CDCl}_3$ ):  $\delta = 21.1, 78.9, 85.2, 123.7, 127.1, 128.6, 129.3, 132.7, 134.7, 138.7, 163.7$ . HRMS (ESI-TOF) Calcd for  $\text{C}_{17}\text{H}_{16}\text{NO}_4$ ,  $[\text{M}+\text{H}]^+ m/z$  298.1079; Found 298.1087.

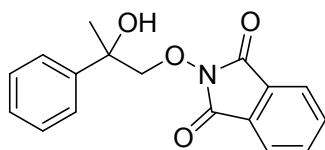

### 2-(2-hydroxy-2-phenylpropoxy)isoindoline-1,3-dione 3w

White solid. mp:108-109 °C  $^1\text{H}$  NMR (400 MHz;  $\text{CDCl}_3$ ):  $\delta = 1.65$  (s, 3H), 4.65 (dd,  $J_1 = 9.6$  Hz,  $J_2 = 22.0$  Hz, 2H), 7.28 (t,  $J = 7.2$  Hz, 1H), 7.36 (t,  $J = 7.6$  Hz, 2H), 7.50 (d,  $J = 7.2$  Hz, 2H), 7.74-7.77 (m, 2H), 7.82-7.84 (m, 2H), 9.80 (s, 1H);  $^{13}\text{C}$  NMR (100 MHz,  $\text{CDCl}_3$ ):  $\delta = 22.8, 79.7, 84.3, 123.7, 125.3, 127.8, 128.4, 128.5, 134.8, 140.7, 163.8$ . HRMS (ESI-TOF) Calcd for  $\text{C}_{17}\text{H}_{16}\text{NO}_4$ ,  $[\text{M}+\text{H}]^+ m/z$  298.1079; Found 298.1089.

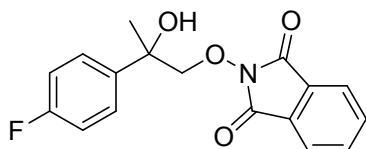

### 2-(2-(4-fluorophenyl)-2-hydroxypropoxy)isoindoline-1,3-dione 3x

Colorless oil.  $^1\text{H}$  NMR (400 MHz;  $\text{CDCl}_3$ ):  $\delta = 1.63$  (s, 3H), 4.63 (dd,  $J_1 = 9.6$  Hz,  $J_2 = 20.0$  Hz, 2H), 7.05 (t,  $J = 8.4$  Hz, 2H), 7.47-7.50 (m, 2H), 7.76-7.79 (m, 2H), 7.82-7.86 (m, 2H), 9.86 (s, 1H);  $^{13}\text{C}$  NMR (100 MHz,  $\text{CDCl}_3$ ):  $\delta = 22.8, 79.7, 84.0, 115.2, 115.4, 123.8, 127.3, 127.4, 128.6, 134.8, 136.4, 136.5, 161.0, 163.5, 163.8$ . HRMS (ESI-TOF) Calcd for  $\text{C}_{17}\text{H}_{15}\text{FNO}_4$ ,  $[\text{M}+\text{H}]^+ m/z$  316.0985; Found 316.0992.

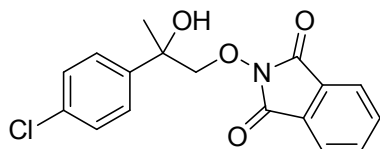

### 2-(2-(4-chlorophenyl)-2-hydroxypropoxy)isoindoline-1,3-dione 3y

White solid. mp:108-109 °C  $^1\text{H}$  NMR (400 MHz;  $\text{CDCl}_3$ ):  $\delta = 1.62$  (s, 3H), 4.61 (dd,  $J_1 = 9.6$  Hz,  $J_2 = 24.0$  Hz, 2H), 7.32 (dd,  $J_1 = 2.0$  Hz,  $J_2 = 6.8$  Hz, 2H), 7.44 (dd,  $J_1 = 2.0$  Hz,  $J_2 = 6.8$  Hz, 2H), 7.75-7.78 (m, 2H), 7.81-7.85 (m, 2H), 9.88 (s, 1H);  $^{13}\text{C}$  NMR (100 MHz,  $\text{CDCl}_3$ ):  $\delta = 22.7, 79.5, 84.0, 123.8, 127.0, 128.5, 128.6, 133.7, 134.8, 139.2, 163.8$ . HRMS (ESI-TOF) Calcd for  $\text{C}_{17}\text{H}_{15}\text{ClNO}_4$ ,  $[\text{M}+\text{H}]^+ m/z$  332.0690; Found 332.0697.

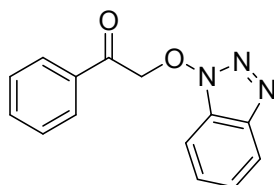

### 2-((1H-benzo[d][1,2,3]triazol-1-yl)oxy)-1-phenylethanone 4a

White solid. mp:98-99 °C  $^1\text{H}$  NMR (400 MHz;  $\text{CDCl}_3$ ):  $\delta = 5.94$  (s, 2H), 7.39 (t,  $J = 6.8$  Hz, 1H), 7.50-7.63 (m, 4H), 7.90-7.99 (m, 4H);  $^{13}\text{C}$  NMR (100 MHz,  $\text{CDCl}_3$ ):  $\delta = 79.9, 110.3, 119.9, 124.8, 127.9, 128.2, 129.1, 133.8, 134.4, 143.5, 191.7$ . HRMS (ESI-TOF) Calcd for  $\text{C}_{14}\text{H}_{12}\text{N}_3\text{O}_2$ ,  $[\text{M}+\text{H}]^+ m/z$  254.0930; Found 254.0923.

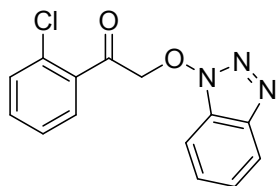

**2-((1H-benzo[d][1,2,3]triazol-1-yl)oxy)-1-(2-chlorophenyl)ethanone 4b**

White solid. mp:80-82 °C <sup>1</sup>H NMR (400 MHz; CDCl<sub>3</sub>): δ = 5.84 (s, 2H), 7.34 (d, *J* = 8.8 Hz, 1H), 7.38 (d, *J* = 8.4 Hz, 1H), 7.43 (t, *J* = 7.2 Hz, 2H), 7.53 (t, *J* = 7.6 Hz, 1H), 7.60 (d, *J* = 7.6 Hz, 1H), 7.84 (d, *J* = 8.4 Hz, 1H), 7.96 (d, *J* = 8.4 Hz, 1H); <sup>13</sup>C NMR (100 MHz, CDCl<sub>3</sub>): δ = 81.8, 110.1, 119.9, 124.8, 127.3, 127.7, 128.2, 130.4, 130.8, 131.9, 133.5, 135.1, 143.4, 194.4. HRMS (ESI-TOF) Calcd for C<sub>14</sub>H<sub>11</sub>ClN<sub>3</sub>O<sub>2</sub>, [M+H]<sup>+</sup> *m/z* 288.0540; Found 288.0547.

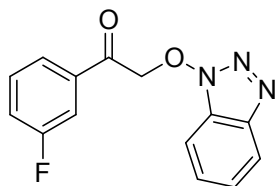

**2-((1H-benzo[d][1,2,3]triazol-1-yl)oxy)-1-(3-fluorophenyl)ethanone 4c**

White solid. mp:121-122 °C <sup>1</sup>H NMR (400 MHz; CDCl<sub>3</sub>): δ = 5.91 (s, 2H), 7.34 (t, *J* = 8.0 Hz, 1H), 7.40 (t, *J* = 7.6 Hz, 1H), 7.50 (dd, *J*<sub>1</sub> = 7.6 Hz, *J*<sub>2</sub> = 13.2 Hz, 1H), 7.55-7.63 (m, 2H), 7.68 (d, *J* = 7.6 Hz, 1H), 7.92 (d, *J* = 8.0 Hz, 1H), 7.98 (d, *J* = 8.4 Hz, 1H); <sup>13</sup>C NMR (100 MHz, CDCl<sub>3</sub>): δ = 79.8, 110.2, 114.6, 114.9, 120.0, 121.5, 121.7, 123.6, 123.6, 124.8, 127.8, 128.3, 130.8, 130.9, 135.7, 135.8, 143.5, 161.7, 164.2, 190.6. HRMS (ESI-TOF) Calcd for C<sub>14</sub>H<sub>11</sub>FN<sub>3</sub>O<sub>2</sub>, [M+H]<sup>+</sup> *m/z* 272.0835; Found 272.0841.

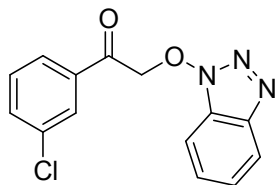

**2-((1H-benzo[d][1,2,3]triazol-1-yl)oxy)-1-(3-chlorophenyl)ethanone 4d**

White solid. mp:118-119 °C <sup>1</sup>H NMR (400 MHz; CDCl<sub>3</sub>): δ = 5.90 (s, 2H), 7.38-7.47 (m, 2H), 7.56 (d, *J* = 8.0 Hz, 1H), 7.60 (d, *J* = 8.0 Hz, 1H), 7.78 (d, *J* = 7.2 Hz, 1H), 7.90-7.93 (m, 2H), 7.98 (d, *J* = 8.4 Hz, 1H); <sup>13</sup>C NMR (100 MHz, CDCl<sub>3</sub>): δ = 79.7, 110.2, 120.0, 124.8, 125.9, 127.8, 128.0, 128.3, 130.4, 134.4, 135.3, 135.6, 143.5, 190.6. HRMS (ESI-TOF) Calcd for C<sub>14</sub>H<sub>11</sub>ClN<sub>3</sub>O<sub>2</sub>, [M+H]<sup>+</sup> *m/z* 288.0540; Found 288.0547.

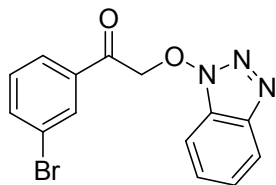

**2-((1H-benzo[d][1,2,3]triazol-1-yl)oxy)-1-(3-bromophenyl)ethanone 4e**

White solid. mp:122-123 °C <sup>1</sup>H NMR (400 MHz; CDCl<sub>3</sub>): δ = 5.90 (s, 2H), 7.36-7.42 (m, 2H), 7.57 (t, *J* = 7.6 Hz, 1H), 7.75 (d, *J* = 8.0 Hz, 1H), 7.82 (d, *J* = 7.6 Hz, 1H), 7.91 (d, *J* = 8.4 Hz, 1H), 7.98 (d, *J* = 8.4 Hz, 1H), 8.05 (s, 1H); <sup>13</sup>C NMR (100 MHz, CDCl<sub>3</sub>): δ = 79.7, 110.2, 120.0, 123.4, 124.8, 126.3, 127.8, 128.3, 130.6, 131.0, 135.4, 137.3, 143.5, 190.5. HRMS (ESI-TOF) Calcd for

C<sub>14</sub>H<sub>11</sub>BrN<sub>3</sub>O<sub>2</sub>, [M+H]<sup>+</sup> *m/z* 332.0035; Found 332.0041.

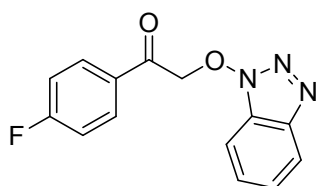

**2-((1H-benzo[d][1,2,3]triazol-1-yl)oxy)-1-(4-fluorophenyl)ethanone 4f**

White solid. mp:143-144 °C <sup>1</sup>H NMR (400 MHz; CDCl<sub>3</sub>): δ = 5.89 (s, 2H), 7.18 (t, *J* = 8.4 Hz, 2H), 7.40 (t, *J* = 7.6 Hz, 1H), 7.57 (d, *J* = 7.6 Hz, 1H), 7.90-7.99 (m, 4H); <sup>13</sup>C NMR (100 MHz, CDCl<sub>3</sub>): δ = 79.7, 110.2, 116.3, 116.5, 119.9, 124.8, 127.8, 128.3, 130.3, 130.3, 130.6, 130.7, 143.5, 165.1, 167.7, 190.1. HRMS (ESI-TOF) Calcd for C<sub>14</sub>H<sub>11</sub>FN<sub>3</sub>O<sub>2</sub>, [M+H]<sup>+</sup> *m/z* 272.0835; Found 272.0841.

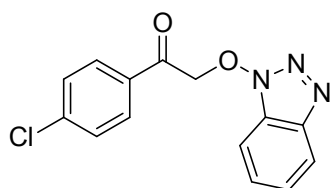

**2-((1H-benzo[d][1,2,3]triazol-1-yl)oxy)-1-(4-chlorophenyl)ethanone 4g**

White solid. mp:146-147 °C <sup>1</sup>H NMR (400 MHz; CDCl<sub>3</sub>): δ = 5.88 (s, 2H), 7.38-7.42 (m, 1H), 7.48 (d, *J* = 8.4 Hz, 2H), 7.57 (t, *J* = 7.6 Hz, 1H), 7.85-7.87 (m, 2H), 7.90 (d, *J* = 8.4 Hz, 1H), 7.98 (d, *J* = 8.4 Hz, 1H); <sup>13</sup>C NMR (100 MHz, CDCl<sub>3</sub>): δ = 79.7, 110.2, 120.0, 124.8, 127.8, 128.3, 129.3, 129.5, 132.4, 141.1, 143.5, 190.6. HRMS (ESI-TOF) Calcd for C<sub>14</sub>H<sub>11</sub>ClN<sub>3</sub>O<sub>2</sub>, [M+H]<sup>+</sup> *m/z* 288.0540; Found 288.0547.

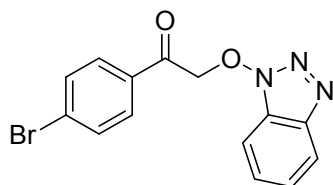

**2-((1H-benzo[d][1,2,3]triazol-1-yl)oxy)-1-(4-bromophenyl)ethanone 4h**

White solid. mp:153-154 °C <sup>1</sup>H NMR (400 MHz; CDCl<sub>3</sub>): δ = 5.88 (s, 2H), 7.40 (t, *J* = 7.6 Hz, 1H), 7.57 (t, *J* = 7.6 Hz, 1H), 7.65 (d, *J* = 8.4 Hz, 2H), 7.78 (d, *J* = 8.4 Hz, 2H), 7.90 (d, *J* = 8.4 Hz, 1H), 7.98 (d, *J* = 8.4 Hz, 1H); <sup>13</sup>C NMR (100 MHz, CDCl<sub>3</sub>): δ = 79.7, 110.2, 120.0, 124.8, 127.8, 128.3, 129.3, 129.9, 132.5, 132.5, 143.5, 190.8. HRMS (ESI-TOF) Calcd for C<sub>14</sub>H<sub>11</sub>BrN<sub>3</sub>O<sub>2</sub>, [M+H]<sup>+</sup> *m/z* 332.0035; Found 332.0031.

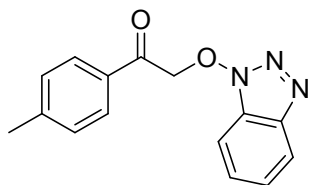

**2-((1H-benzo[d][1,2,3]triazol-1-yl)oxy)-1-(p-tolyl)ethanone 4i**

White solid. mp:122-123 °C <sup>1</sup>H NMR (400 MHz; CDCl<sub>3</sub>): δ = 2.40 (s, 3H), 5.89 (s, 2H), 7.27 (d, *J* = 7.6 Hz, 2H), 7.37 (t, *J* = 7.6 Hz, 1H), 7.54 (t, *J* = 7.6 Hz, 1H), 7.79 (d, *J* = 8.0 Hz, 2H), 7.92 (d, *J* = 8.4 Hz, 1H), 7.96 (d, *J* = 8.4 Hz, 1H); <sup>13</sup>C NMR (100 MHz, CDCl<sub>3</sub>): δ = 21.7, 79.8, 110.3, 119.8, 124.7, 127.8, 127.9, 128.1, 129.7, 131.3, 143.4, 145.5, 191.2. HRMS (ESI-TOF) Calcd for

C<sub>15</sub>H<sub>14</sub>N<sub>3</sub>O<sub>2</sub>, [M+H]<sup>+</sup> *m/z* 268.1086; Found 268.1095.

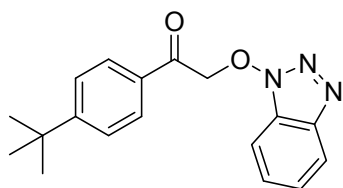

**2-((1H-benzo[d][1,2,3]triazol-1-yl)oxy)-1-(4-(tert-butyl)phenyl)ethanone 4j**

White solid. mp:91-92 °C <sup>1</sup>H NMR (400 MHz; CDCl<sub>3</sub>): δ = 1.33 (s, 9H), 5.91 (s, 2H), 7.39 (t, *J* = 7.6 Hz, 1H), 7.50 (d, *J* = 8.0 Hz, 2H), 7.56 (t, *J* = 7.6 Hz, 1H), 7.84 (d, *J* = 8.4 Hz, 2H), 7.92-7.99(m, 2H); <sup>13</sup>C NMR (100 MHz, CDCl<sub>3</sub>): δ = 31.0, 35.3, 79.9, 110.3, 119.9, 124.7, 126.0, 127.8, 127.9, 128.2, 131.3, 143.5, 158.5, 191.3. HRMS (ESI-TOF) Calcd for C<sub>18</sub>H<sub>20</sub>N<sub>3</sub>O<sub>2</sub>, [M+H]<sup>+</sup> *m/z* 310.1556; Found 310.1551.

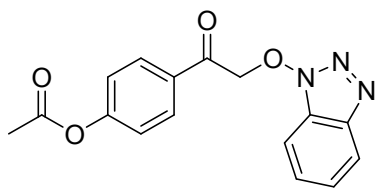

**4-(2-((1H-benzo[d][1,2,3]triazol-1-yl)oxy)acetyl)phenyl acetate 4k**

White solid. mp:100-102 °C <sup>1</sup>H NMR (400 MHz; CDCl<sub>3</sub>): δ = 2.31 (s, 3H), 5.89 (s, 2H), 7.23 (d, *J* = 8.8 Hz, 2H), 7.38 (t, *J* = 7.6 Hz, 1H), 7.55 (t, *J* = 7.6 Hz, 1H), 7.89-7.98 (m, 4H); <sup>13</sup>C NMR (100 MHz, CDCl<sub>3</sub>): δ = 21.1, 79.8, 110.2, 119.9, 122.3, 124.8, 127.8, 128.2, 129.5, 131.3, 143.4, 155.3, 168.5, 190.5. HRMS (ESI-TOF) Calcd for C<sub>16</sub>H<sub>14</sub>N<sub>3</sub>O<sub>4</sub>, [M+H]<sup>+</sup> *m/z* 312.0984; Found 312.0981.

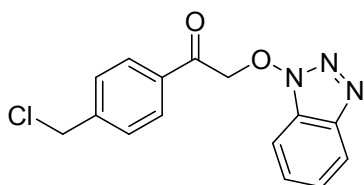

**2-((1H-benzo[d][1,2,3]triazol-1-yl)oxy)-1-(4-(chloromethyl)phenyl)ethanone 4l**

White solid. mp:123-124 °C <sup>1</sup>H NMR (400 MHz; CDCl<sub>3</sub>): δ = 4.59 (s, 2H), 5.91 (s, 2H), 7.38 (t, *J* = 7.6 Hz, 1H), 7.49 (d, *J* = 8.0 Hz, 2H), 7.55 (t, *J* = 7.6 Hz, 1H), 7.89 (t, *J* = 7.6 Hz, 3H), 7.96 (d, *J* = 8.4 Hz, 1H); <sup>13</sup>C NMR (100 MHz, CDCl<sub>3</sub>): δ = 45.0, 79.8, 110.2, 119.8, 124.8, 127.7, 128.2, 128.3, 129.0, 133.5, 143.4, 143.8, 191.1. HRMS (ESI-TOF) Calcd for C<sub>15</sub>H<sub>13</sub>ClN<sub>3</sub>O<sub>2</sub>, [M+H]<sup>+</sup> *m/z* 302.0696; Found 302.0690.

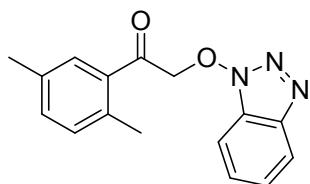

**2-((1H-benzo[d][1,2,3]triazol-1-yl)oxy)-1-(2,5-dimethylphenyl)ethanone 4m**

White solid. mp:106-107 °C <sup>1</sup>H NMR (400 MHz; CDCl<sub>3</sub>): δ = 2.35 (s, 3H), 2.43 (s, 3H), 5.77 (s, 2H), 7.16 (d, *J* = 7.6 Hz, 1H), 7.24 (s, 1H), 7.40 (d, *J* = 8.0 Hz, 2H), 7.54 (t, *J* = 7.6 Hz, 1H), 7.85 (d, *J* = 8.4 Hz, 1H), 7.98 (d, *J* = 8.4 Hz, 1H); <sup>13</sup>C NMR (100 MHz, CDCl<sub>3</sub>): δ = 20.7, 20.8, 80.9, 110.2, 119.9, 124.7, 127.7, 128.1, 129.0, 132.4, 133.5, 133.7, 135.6, 136.3, 143.5, 194.9. HRMS (ESI-TOF) Calcd for C<sub>16</sub>H<sub>16</sub>N<sub>3</sub>O<sub>2</sub>, [M+H]<sup>+</sup> *m/z* 282.1243; Found 282.1251.

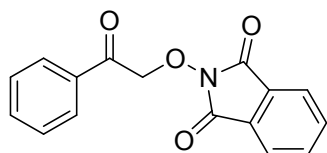

**2-(2-oxo-2-phenylethoxy)isoindoline-1,3-dione 4n**

White solid. mp:108-109 °C <sup>1</sup>H NMR (400 MHz; CDCl<sub>3</sub>): δ = 5.44 (s, 2H), 7.48-7.52 (m, 2H), 7.59-7.63 (m, 1H), 7.74-7.76 (m, 2H), 7.83-7.86 (m, 2H), 8.00-8.01 (m, 2H); <sup>13</sup>C NMR (100 MHz, CDCl<sub>3</sub>): δ = 78.5, 123.6, 123.7, 128.3, 128.8, 134.0, 134.3, 134.6, 163.0, 192.2. HRMS (ESI-TOF) Calcd for C<sub>16</sub>H<sub>12</sub>NO<sub>4</sub>, [M+H]<sup>+</sup> *m/z* 282.0766; Found 282.0761.

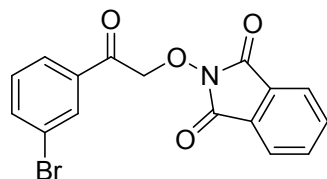

**2-(2-(3-bromophenyl)-2-oxoethoxy)isoindoline-1,3-dione 4o**

White solid. mp:152-153 °C <sup>1</sup>H NMR (400 MHz; CDCl<sub>3</sub>): δ = 5.37 (s, 2H), 7.39 (t, *J* = 8.0 Hz, 1H), 7.73-7.77 (m, 2H), 7.83-7.86 (m, 3H), 7.96 (d, *J* = 7.6 Hz, 1H), 8.16 (s, 1H); <sup>13</sup>C NMR (100 MHz, CDCl<sub>3</sub>): δ = 78.6, 123.1, 123.8, 127.0, 128.8, 130.4, 131.5, 134.7, 136.1, 136.9, 162.9, 191.1. HRMS (ESI-TOF) Calcd for C<sub>16</sub>H<sub>11</sub>BrNO<sub>4</sub>, [M+H]<sup>+</sup> *m/z* 359.9871; Found 359.9873.

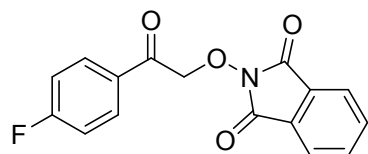

**2-(2-(4-fluorophenyl)-2-oxoethoxy)isoindoline-1,3-dione 4p**

White solid. mp:152-154 °C <sup>1</sup>H NMR (400 MHz; CDCl<sub>3</sub>): δ = 5.37 (s, 2H), 7.18 (d, *J* = 8.4 Hz, 2H), 7.76 (dd, *J*<sub>1</sub> = 3.2 Hz, *J*<sub>2</sub> = 5.6 Hz, 2H), 7.84 (dd, *J*<sub>1</sub> = 3.2 Hz, *J*<sub>2</sub> = 5.6 Hz, 2H), 8.07-8.10 (m, 2H); <sup>13</sup>C NMR (100 MHz, CDCl<sub>3</sub>): δ = 78.7, 116.0, 116.2, 123.7, 128.8, 131.0, 131.3, 131.4, 134.7, 162.9, 165.0, 167.5, 190.8. HRMS (ESI-TOF) Calcd for C<sub>16</sub>H<sub>11</sub>FNO<sub>4</sub>, [M+H]<sup>+</sup> *m/z* 300.0672; Found 300.0670.

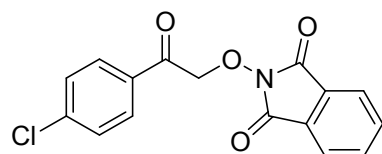

**2-(2-(4-chlorophenyl)-2-oxoethoxy)isoindoline-1,3-dione 4q**

White solid. mp:160-161 °C <sup>1</sup>H NMR (400 MHz; CDCl<sub>3</sub>): δ = 5.37 (s, 2H), 7.49 (d, *J* = 8.4 Hz, 2H), 7.76-7.78 (m, 2H), 7.84-7.86 (m, 2H), 7.99 (d, *J* = 8.4 Hz, 2H); <sup>13</sup>C NMR (100 MHz, CDCl<sub>3</sub>): δ = 78.7, 123.8, 128.8, 129.2, 130.0, 132.8, 134.7, 140.6, 163.0, 191.3. HRMS (ESI-TOF) Calcd for C<sub>16</sub>H<sub>11</sub>ClNO<sub>4</sub>, [M+H]<sup>+</sup> *m/z* 316.0377; Found 316.0370.

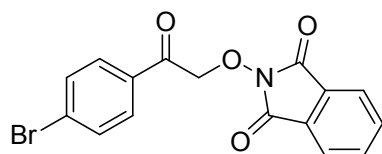

**2-(2-(4-bromophenyl)-2-oxoethoxy)isoindoline-1,3-dione 4r**

White solid. mp:164-166 °C <sup>1</sup>H NMR (400 MHz; CDCl<sub>3</sub>): δ = 5.36 (s, 2H), 7.66(d, *J* = 8.8 Hz,

2H), 7.77 (dd,  $J_1 = 3.2$  Hz,  $J_2 = 5.2$  Hz, 2H), 7.85 (dd,  $J_1 = 3.2$  Hz,  $J_2 = 5.2$  Hz, 2H), 7.92 (d,  $J = 8.4$  Hz, 2H);  $^{13}\text{C}$  NMR (100 MHz,  $\text{CDCl}_3$ ):  $\delta = 78.7, 123.8, 128.8, 129.4, 130.0, 132.2, 133.2, 134.7, 162.9, 191.5$ . HRMS (ESI-TOF) Calcd for  $\text{C}_{16}\text{H}_{11}\text{BrNO}_4$ ,  $[\text{M}+\text{H}]^+$   $m/z$  359.9871; Found 359.9875.

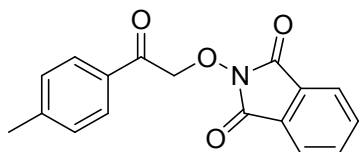

**2-(2-oxo-2-(*p*-tolyl)ethoxy)isoindoline-1,3-dione 4s**

White solid. mp:147-148 °C  $^1\text{H}$  NMR (400 MHz;  $\text{CDCl}_3$ ):  $\delta = 2.42$  (s, 3H), 5.42 (s, 2H), 7.29 (d,  $J = 8.0$  Hz, 2H), 7.75 (dd,  $J_1 = 3.2$  Hz,  $J_2 = 5.6$  Hz, 2H), 7.84 (dd,  $J_1 = 3.2$  Hz,  $J_2 = 5.6$  Hz, 2H), 7.90 (d,  $J = 8.0$  Hz, 2H);  $^{13}\text{C}$  NMR (100 MHz,  $\text{CDCl}_3$ ):  $\delta = 21.8, 78.4, 123.7, 128.4, 128.9, 129.5, 132.0, 134.6, 145.1, 163.0, 191.8$ . HRMS (ESI-TOF) Calcd for  $\text{C}_{17}\text{H}_{14}\text{NO}_4$ ,  $[\text{M}+\text{H}]^+$   $m/z$  296.0923; Found 296.0921.

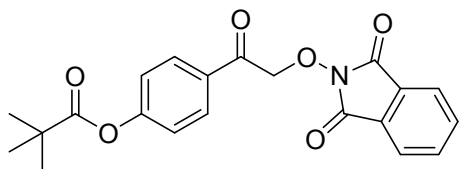

**4-(2-((1,3-dioxoisindolin-2-yl)oxy)acetyl)phenyl pivalate 4t**

White solid. mp:124-126 °C  $^1\text{H}$  NMR (400 MHz;  $\text{CDCl}_3$ ):  $\delta = 1.35$  (s, 9H), 5.41 (s, 2H), 7.20 (d,  $J = 8.4$  Hz, 2H), 7.50 (dd,  $J_1 = 3.2$  Hz,  $J_2 = 5.2$  Hz, 2H), 7.83 (dd,  $J_1 = 3.2$  Hz,  $J_2 = 5.2$  Hz, 2H), 8.05 (d,  $J = 8.8$  Hz, 2H);  $^{13}\text{C}$  NMR (100 MHz,  $\text{CDCl}_3$ ):  $\delta = 27.0, 39.2, 78.5, 122.0, 123.7, 128.8, 130.0, 131.8, 134.6, 155.6, 162.9, 176.3, 191.1$ . HRMS (ESI-TOF) Calcd for  $\text{C}_{21}\text{H}_{20}\text{NO}_6$ ,  $[\text{M}+\text{H}]^+$   $m/z$  382.1291; Found 382.1295.

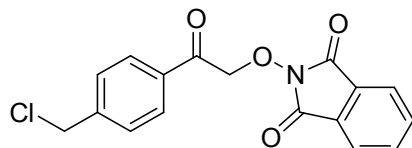

**2-(2-(4-(chloromethyl)phenyl)-2-oxoethoxy)isoindoline-1,3-dione 4u**

White solid. mp:178-180 °C  $^1\text{H}$  NMR (400 MHz;  $\text{CDCl}_3$ ):  $\delta = 4.62$  (s, 2H), 5.41 (s, 2H), 7.53 (d,  $J = 8.4$  Hz, 2H), 7.77 (dd,  $J_1 = 3.2$  Hz,  $J_2 = 5.2$  Hz, 2H), 7.86 (dd,  $J_1 = 3.2$  Hz,  $J_2 = 5.2$  Hz, 2H), 8.03 (d,  $J = 8.4$  Hz, 2H);  $^{13}\text{C}$  NMR (100 MHz,  $\text{CDCl}_3$ ):  $\delta = 45.2, 78.7, 123.8, 128.8, 128.9, 128.9, 134.3, 134.7, 143.4, 163.0, 191.8$ . HRMS (ESI-TOF) Calcd for  $\text{C}_{17}\text{H}_{13}\text{ClNO}_4$ ,  $[\text{M}+\text{H}]^+$   $m/z$  330.0533; Found 330.0524.

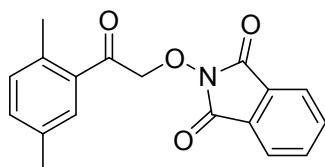

**2-(2-(2,5-dimethylphenyl)-2-oxoethoxy)isoindoline-1,3-dione 4v**

White solid. mp:153-155 °C  $^1\text{H}$  NMR (400 MHz;  $\text{CDCl}_3$ ):  $\delta = 2.37$  (s, 3H), 2.51 (s, 3H), 5.33 (s, 2H), 7.17 (d,  $J = 7.6$  Hz, 1H), 7.24 (d,  $J = 7.6$  Hz, 1H), 7.56 (s, 1H), 7.76 (dd,  $J_1 = 3.2$  Hz,  $J_2 = 5.6$  Hz, 2H), 7.84 (dd,  $J_1 = 3.2$  Hz,  $J_2 = 5.6$  Hz, 2H);  $^{13}\text{C}$  NMR (100 MHz,  $\text{CDCl}_3$ ):  $\delta = 20.8, 20.8,$

79.4, 123.6, 128.8, 129.7, 132.1, 133.2, 134.0, 134.6, 135.3, 136.5, 163.0, 195.3. HRMS (ESI-TOF) Calcd for C<sub>18</sub>H<sub>16</sub>NO<sub>4</sub>, [M+H]<sup>+</sup> *m/z* 310.1079; Found 310.1075.

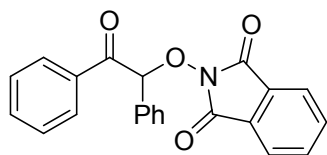

#### 2-(2-oxo-1,2-diphenylethoxy)isoindoline-1,3-dione 4w

White solid. mp:165-166 °C <sup>1</sup>H NMR (400 MHz; CDCl<sub>3</sub>): δ = 6.76 (s, 1H), 7.35-7.37 (m, 3H), 7.42 (t, *J* = 7.6 Hz, 2H), 7.53 (t, *J* = 7.6 Hz, 1H), 7.60-7.63 (m, 2H), 7.70 (dd, *J*<sub>1</sub> = 3.2 Hz, *J*<sub>2</sub> = 5.6 Hz, 2H), 7.77 (dd, *J*<sub>1</sub> = 3.2 Hz, *J*<sub>2</sub> = 5.6 Hz, 2H), 8.02 (d, *J* = 7.6 Hz, 2H); <sup>13</sup>C NMR (100 MHz, CDCl<sub>3</sub>): δ = 88.4, 123.6, 128.6, 128.8, 128.9, 129.1, 129.4, 130.0, 132.7, 133.7, 134.5, 134.8, 163.2, 192.8. HRMS (ESI-TOF) Calcd for C<sub>22</sub>H<sub>16</sub>NO<sub>4</sub>, [M+H]<sup>+</sup> *m/z* 358.1079; Found 358.1075.

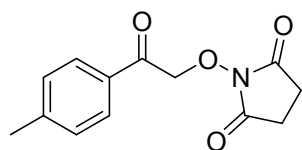

#### 1-(2-oxo-2-(*p*-tolylethoxy)pyrrolidine-2,5-dione 4x

White solid. mp:128-129 °C <sup>1</sup>H NMR (400 MHz; CDCl<sub>3</sub>): δ = 2.41 (s, 3H), 2.74 (d, *J* = 7.6 Hz, 4H), 5.32 (s, 2H), 7.27 (d, *J* = 8.8 Hz, 2H), 7.84 (d, *J* = 8.0 Hz, 2H); <sup>13</sup>C NMR (100 MHz, CDCl<sub>3</sub>): δ = 21.7, 25.5, 76.9, 128.3, 129.5, 131.9, 145.1, 170.5, 191.7. HRMS (ESI-TOF) Calcd for C<sub>13</sub>H<sub>14</sub>NO<sub>4</sub>, [M+H]<sup>+</sup> *m/z* 248.0923; Found 248.0927.

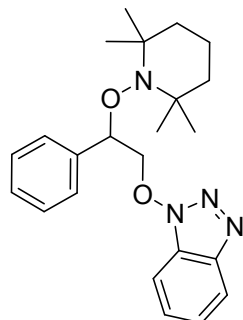

#### 1-(2-phenyl-2-((2,2,6,6-tetramethylpiperidin-1-yl)oxy)ethoxy)-1H-benzo[*d*][1,2,3]triazole 5

White solid. mp:100-101 °C <sup>1</sup>H NMR (400 MHz; CDCl<sub>3</sub>): δ = 0.81 (s, 2H), 1.13 (s, 3H), 1.27 (s, 3H), 1.42 (s, 6H), 1.56 (s, 4H), 4.84 (dd, *J*<sub>1</sub> = 6.8 Hz, *J*<sub>2</sub> = 9.2 Hz, 1H), 5.08 (dd, *J*<sub>1</sub> = 4.4 Hz, *J*<sub>2</sub> = 9.2 Hz, 1H), 5.24 (t, *J* = 5.6 Hz, 1H), 7.06 (d, *J* = 8.0 Hz, 1H), 7.35-7.47 (m, 5H), 7.51 (d, *J* = 6.8 Hz, 2H), 8.00 (d, *J* = 8.0 Hz, 1H); <sup>13</sup>C NMR (100 MHz, CDCl<sub>3</sub>): δ = 16.3, 19.5, 33.2, 39.6, 59.4, 81.4, 82.4, 107.9, 119.2, 123.7, 126.1, 126.9, 127.0, 127.2, 127.5, 139.0, 142.5. HRMS (ESI-TOF) Calcd for C<sub>23</sub>H<sub>31</sub>N<sub>4</sub>O<sub>2</sub>, [M+H]<sup>+</sup> *m/z* 395.2447; Found 395.2441.



## V. $^1\text{H}$ and $^{13}\text{C}$ Spectra of Compounds 3, 4 and 5

### Product 3a

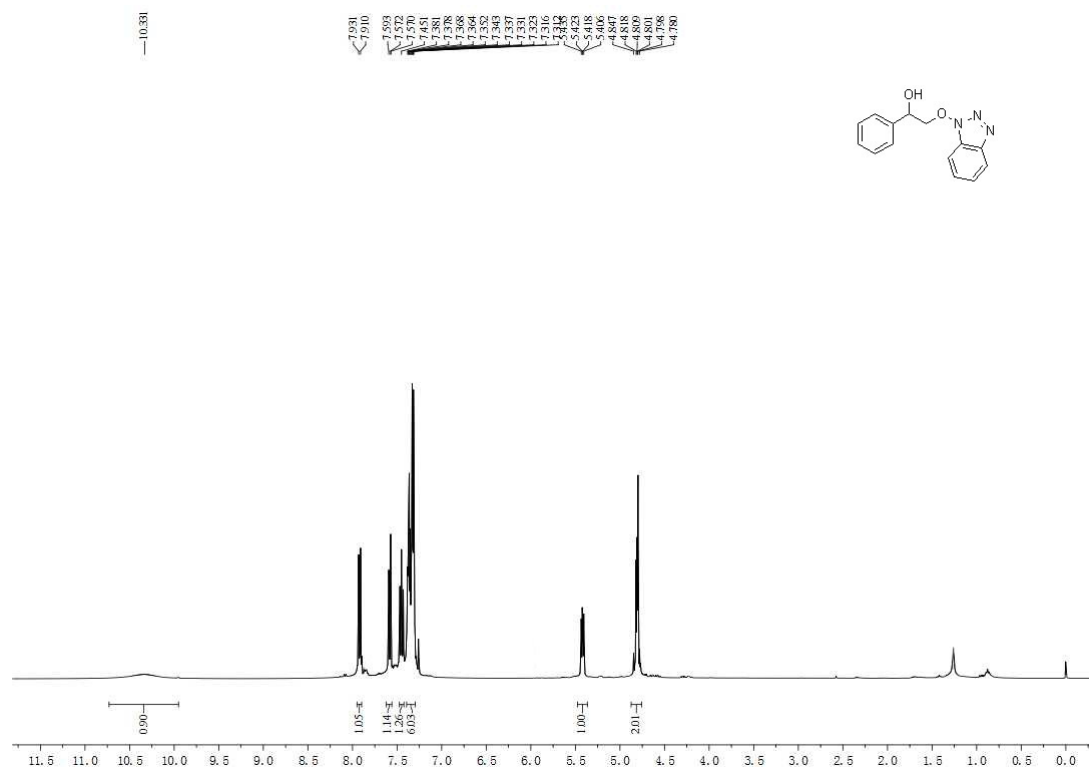

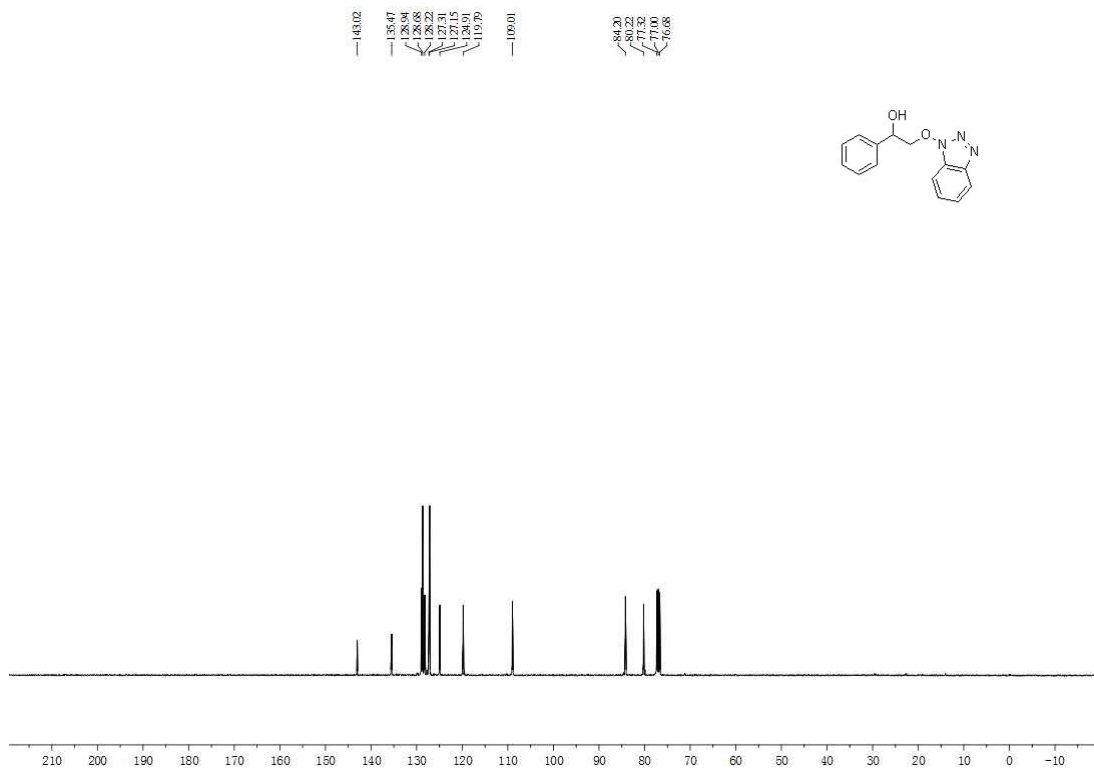

**Product 3b**

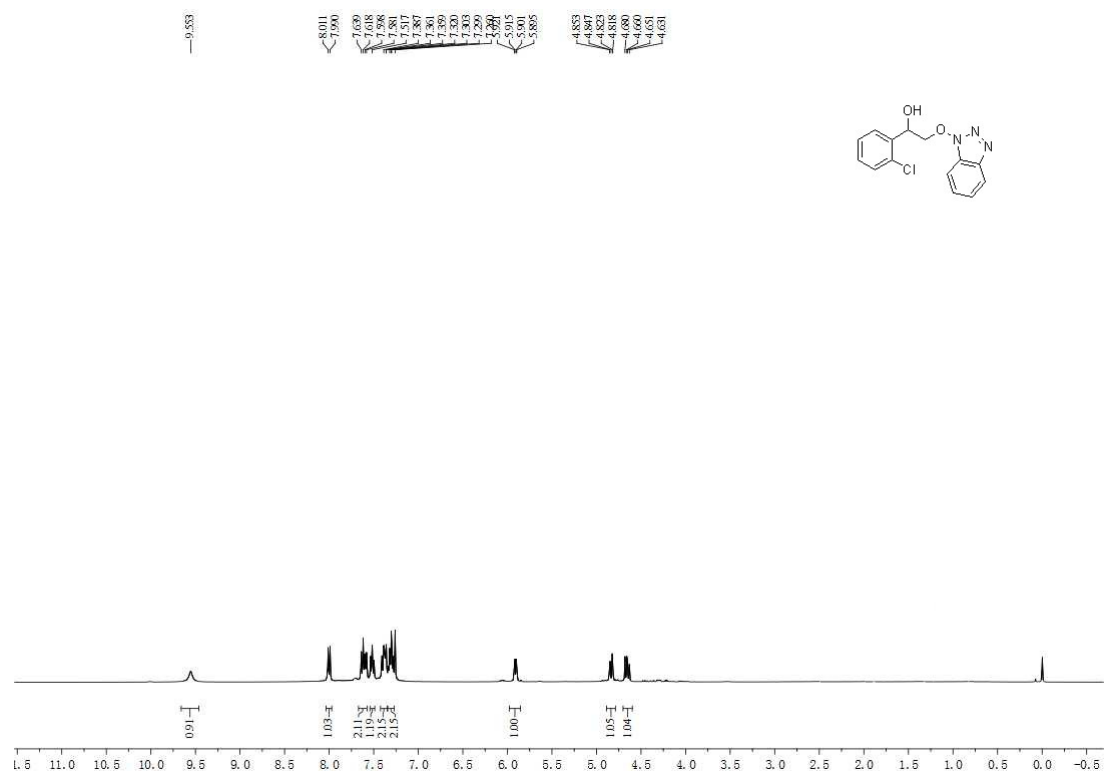

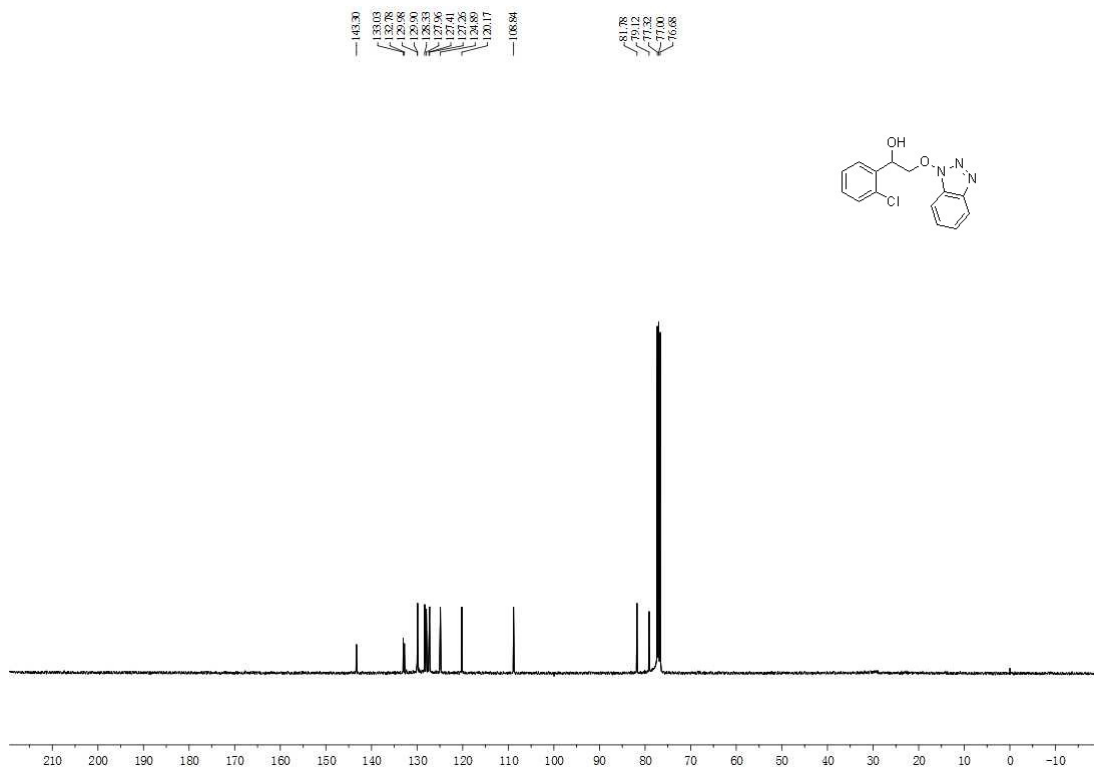

**Product 3c**

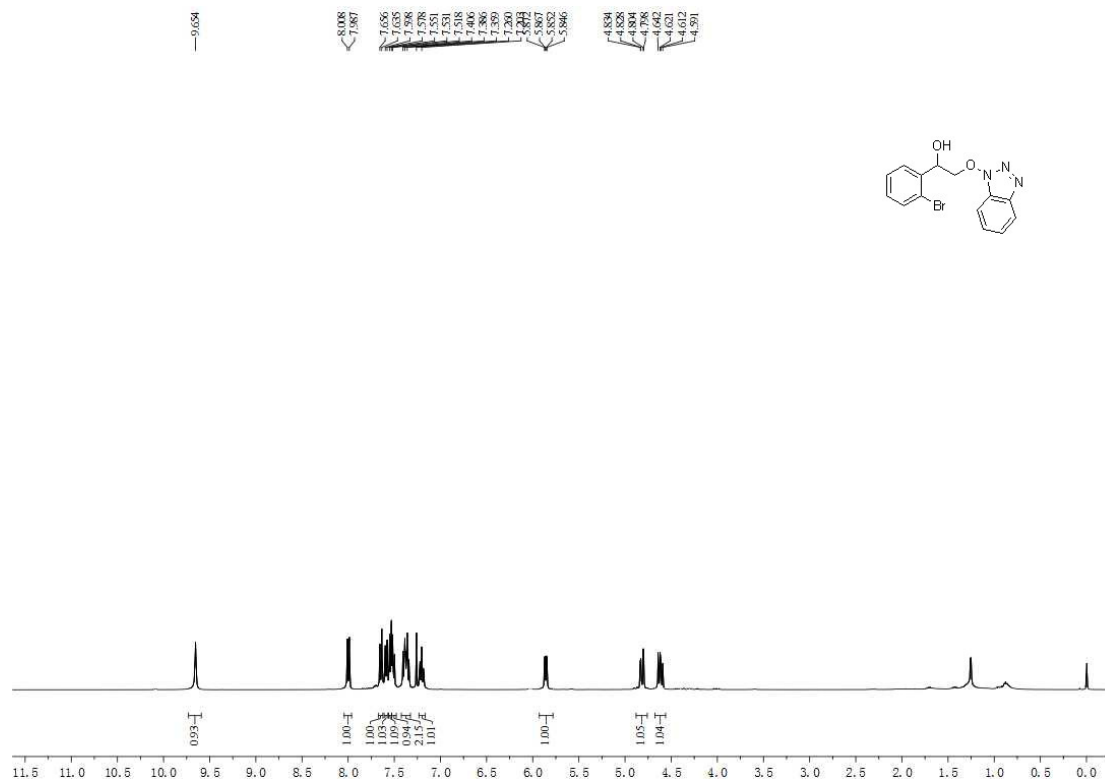

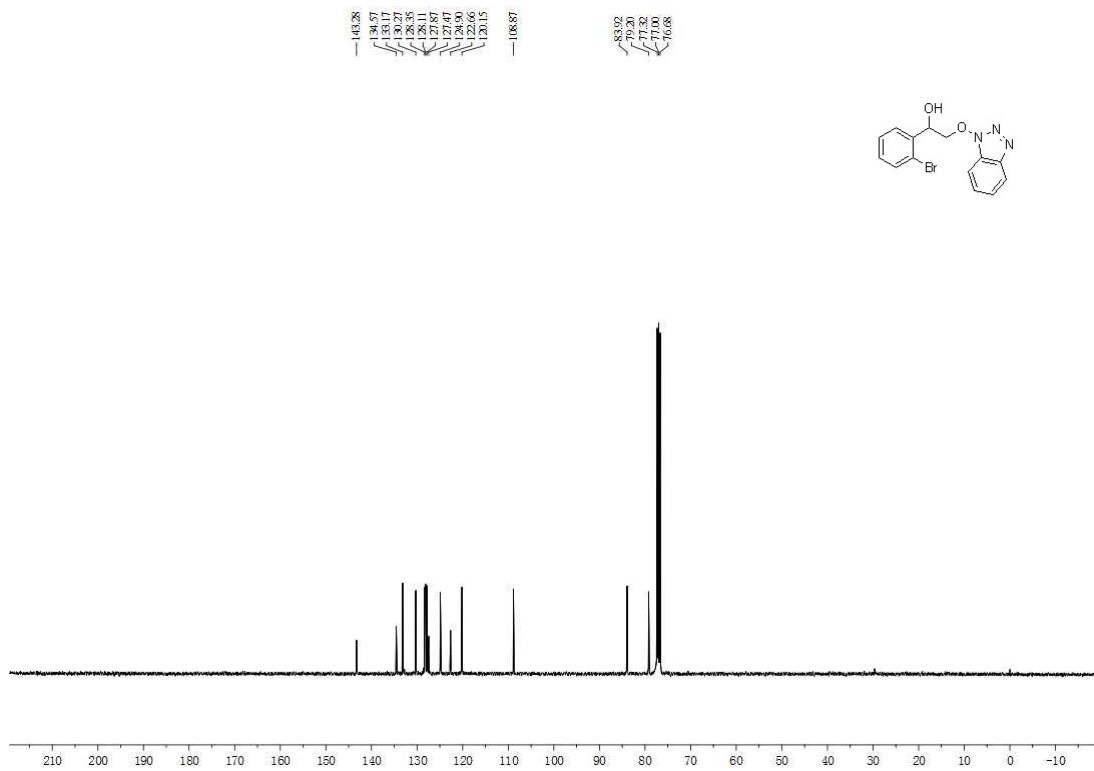

**Product 3d**

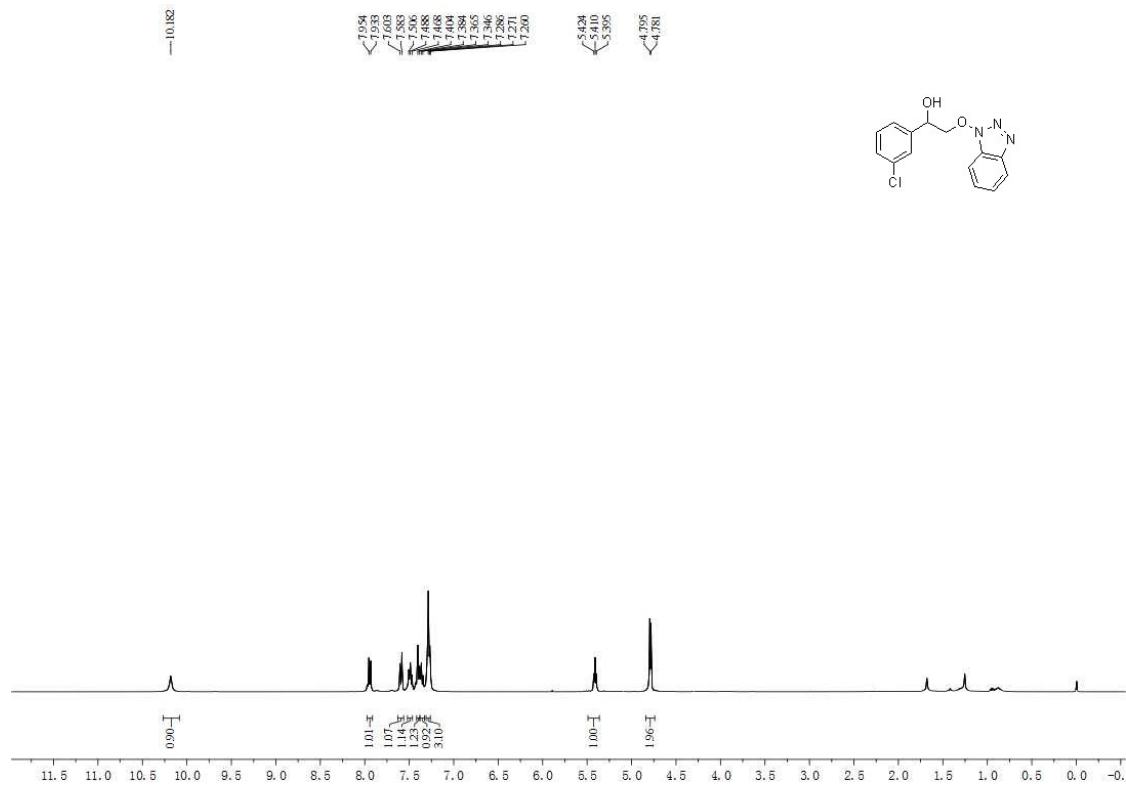

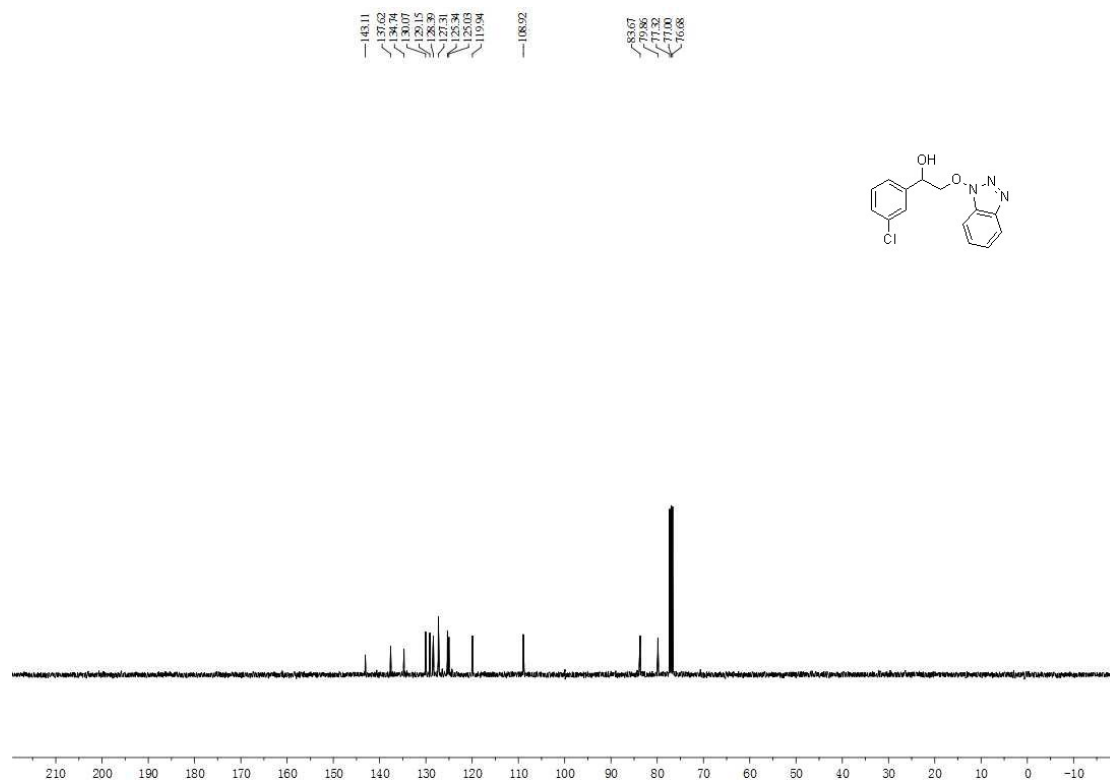

### Product 3c

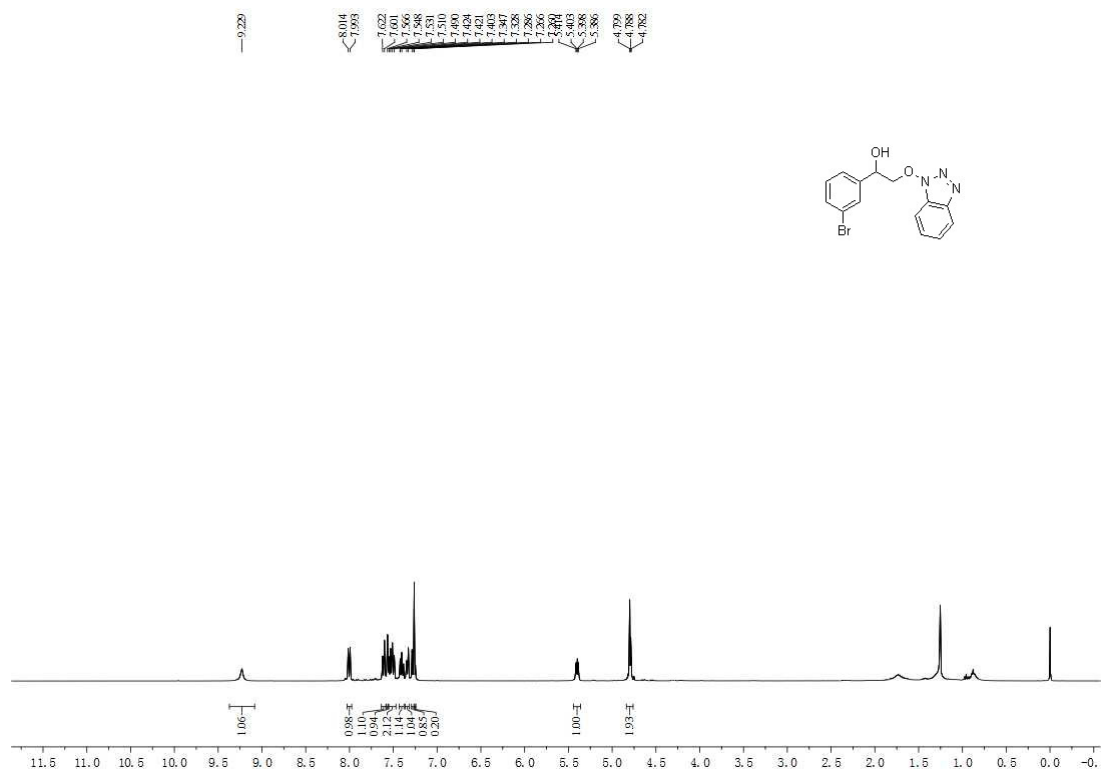

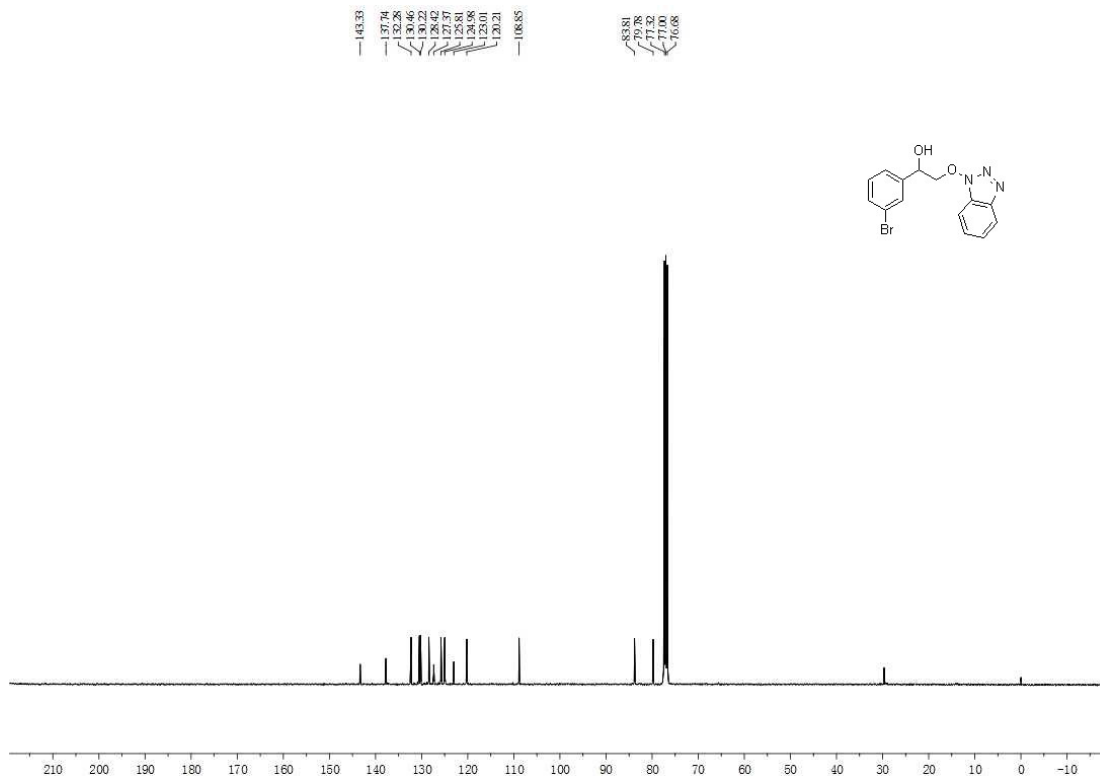

**Product 3f**

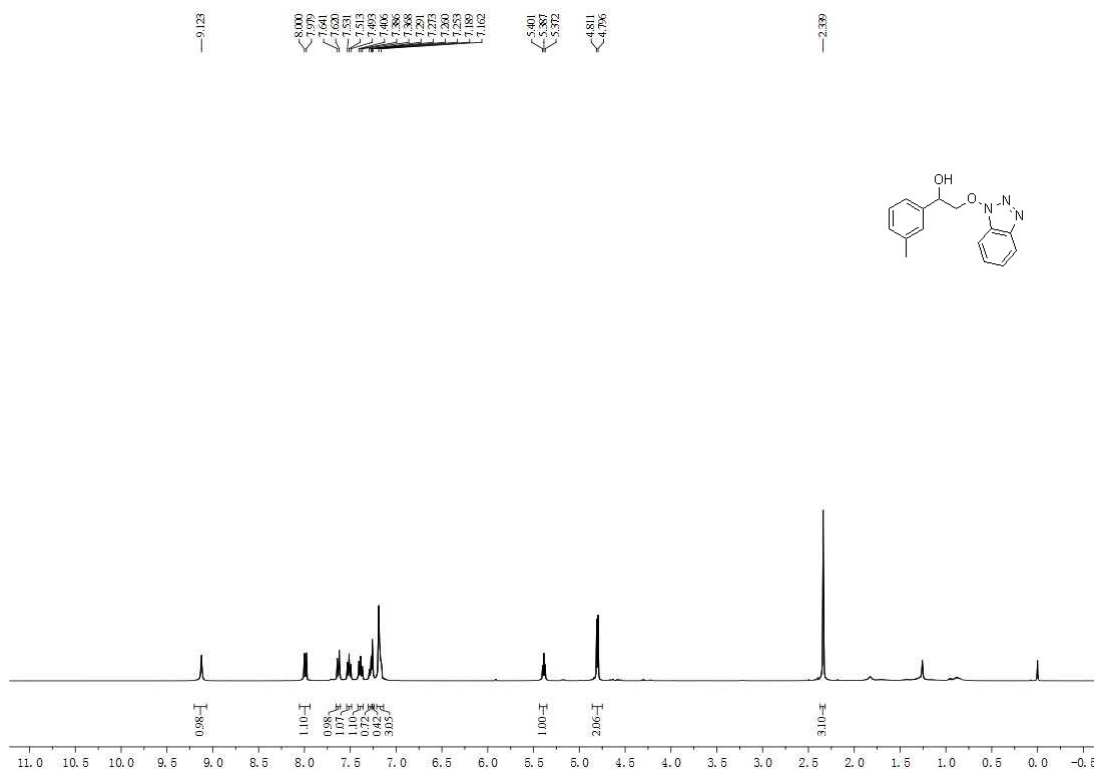

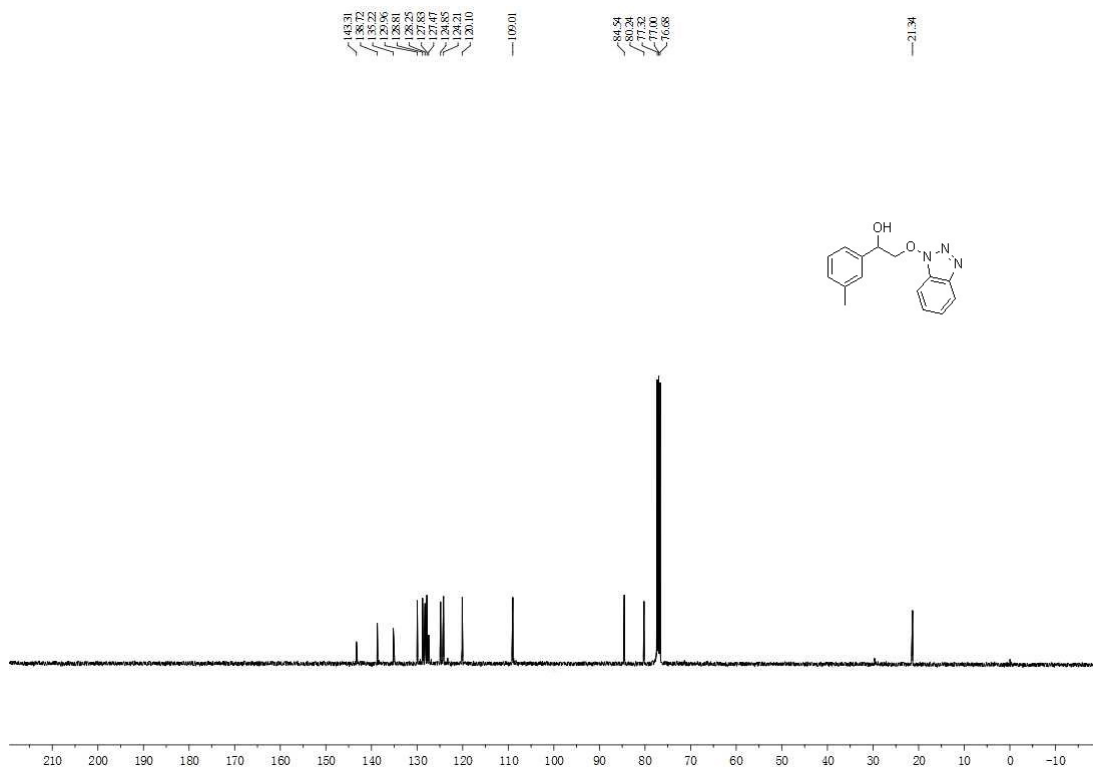

**Product 3g**

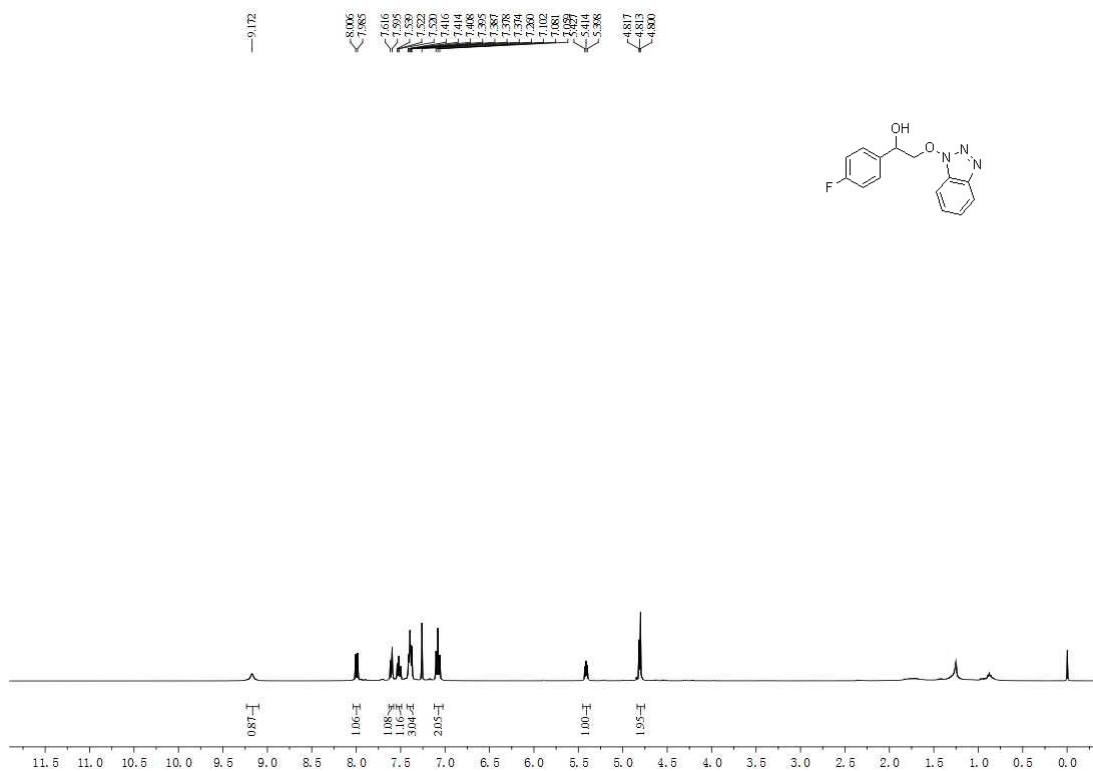

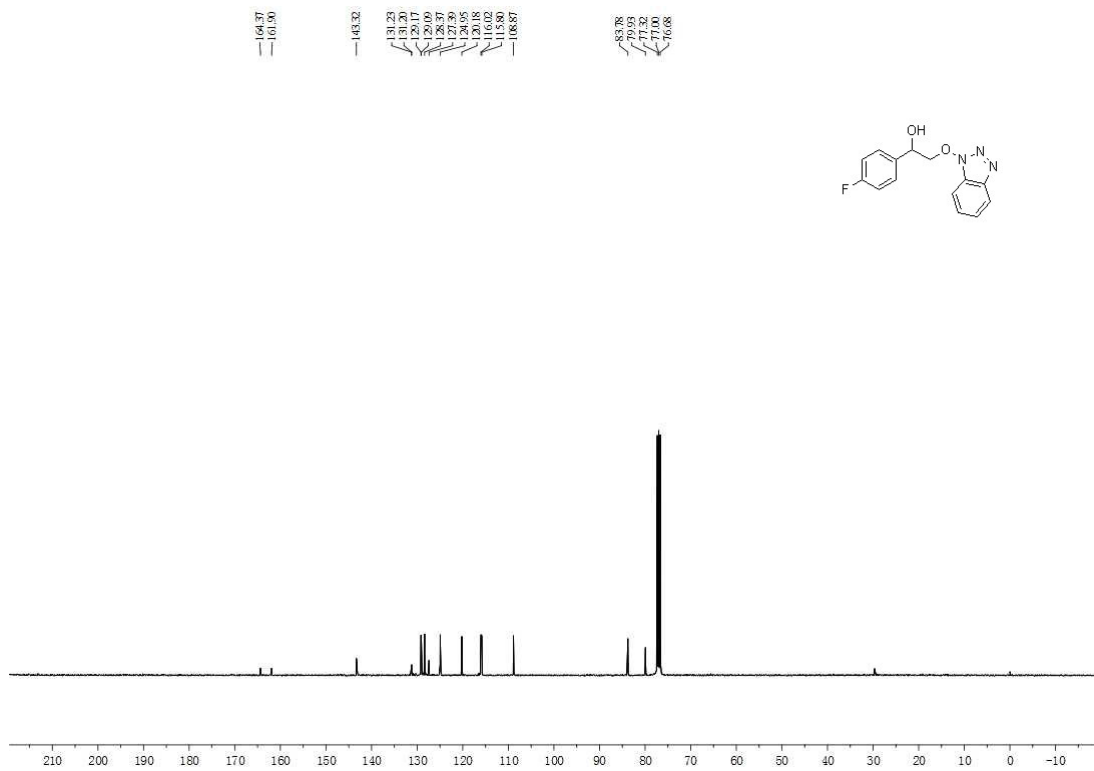

### Product 3h

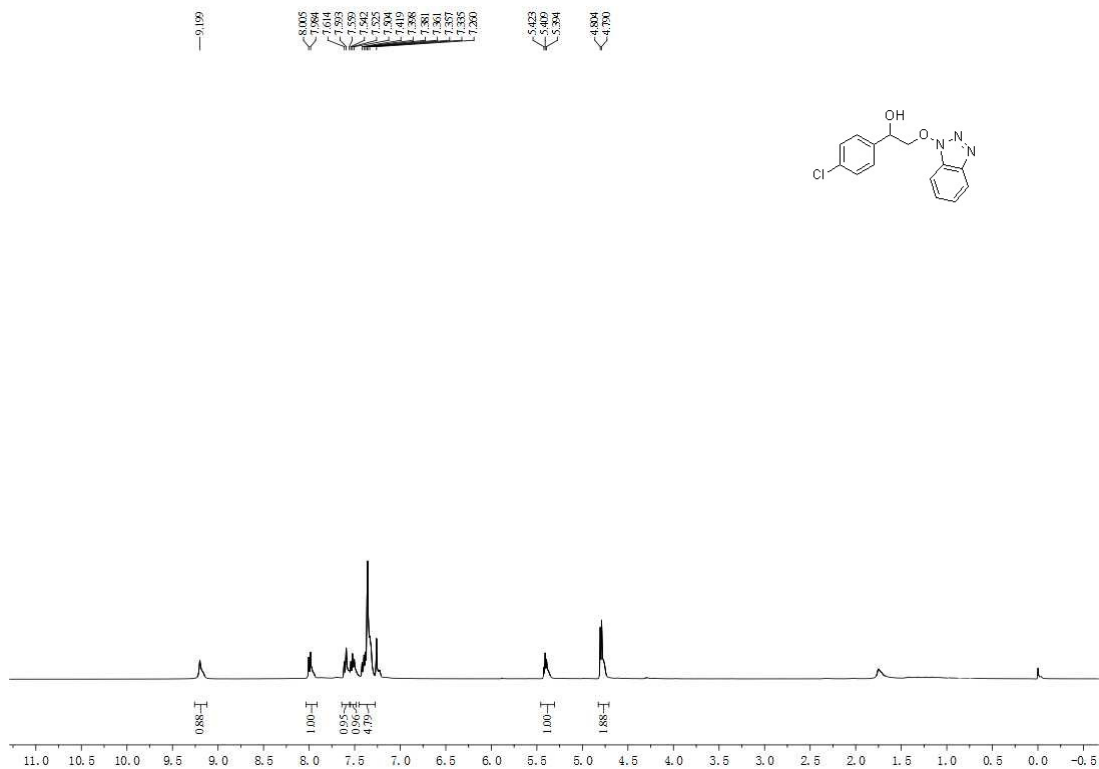





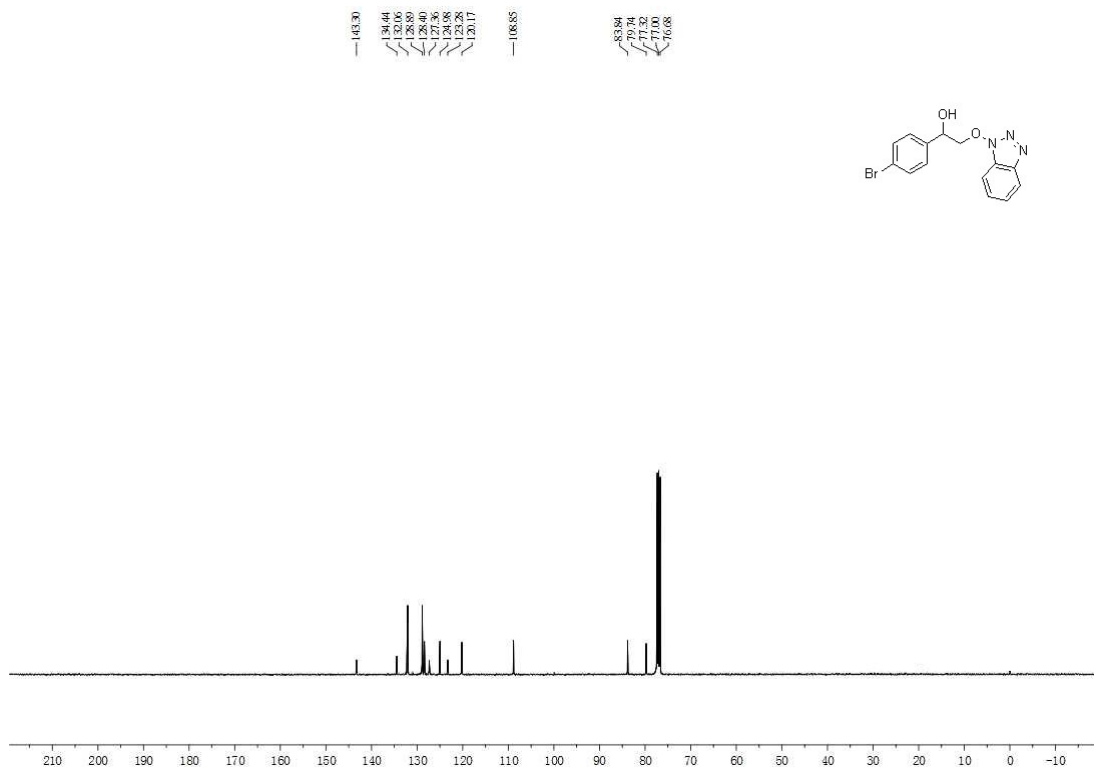

**Product 3j**

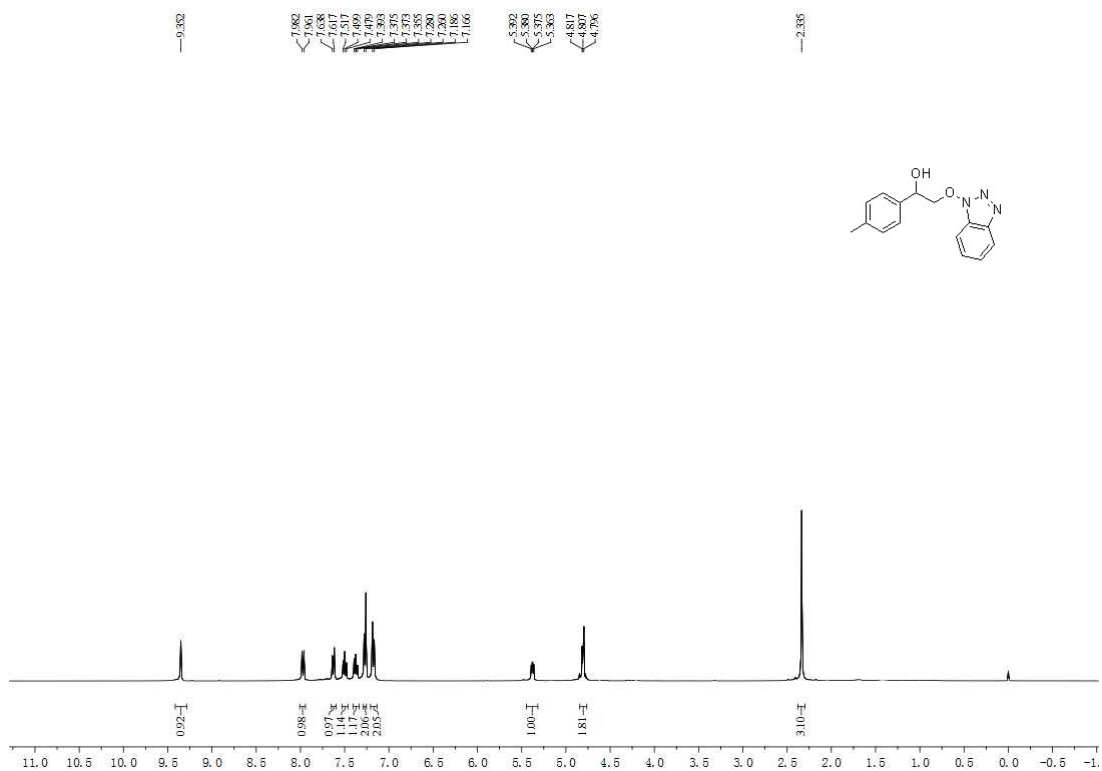

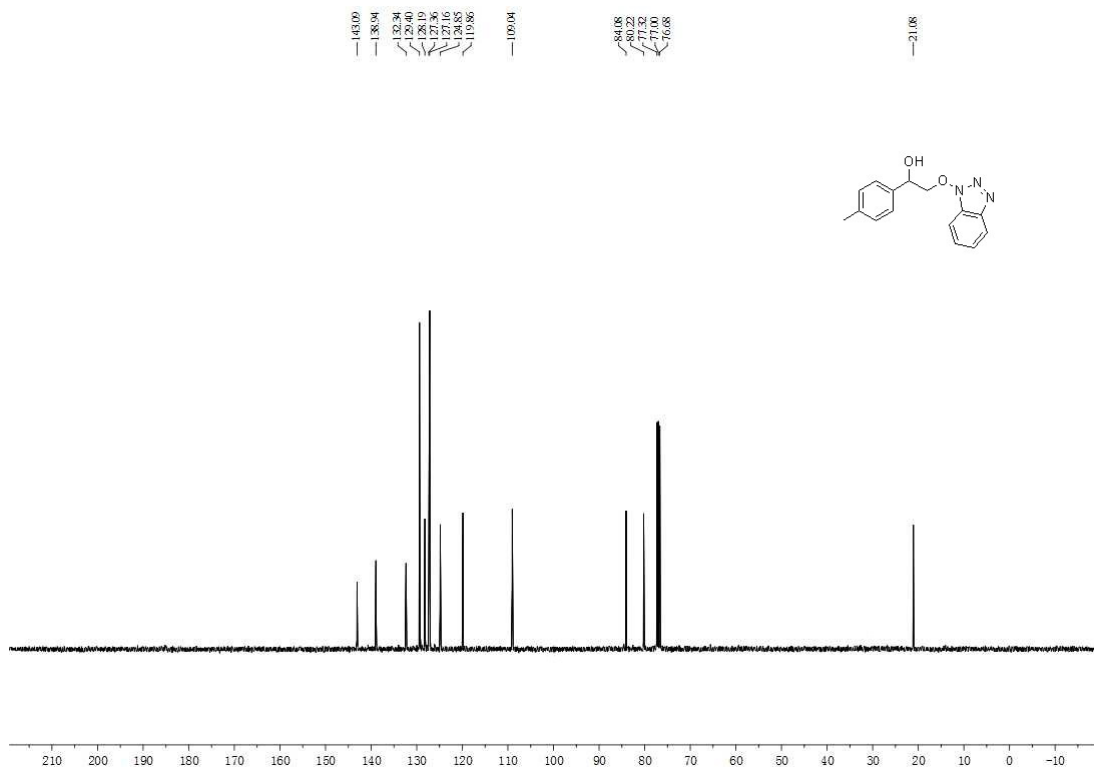

**Product 3k**

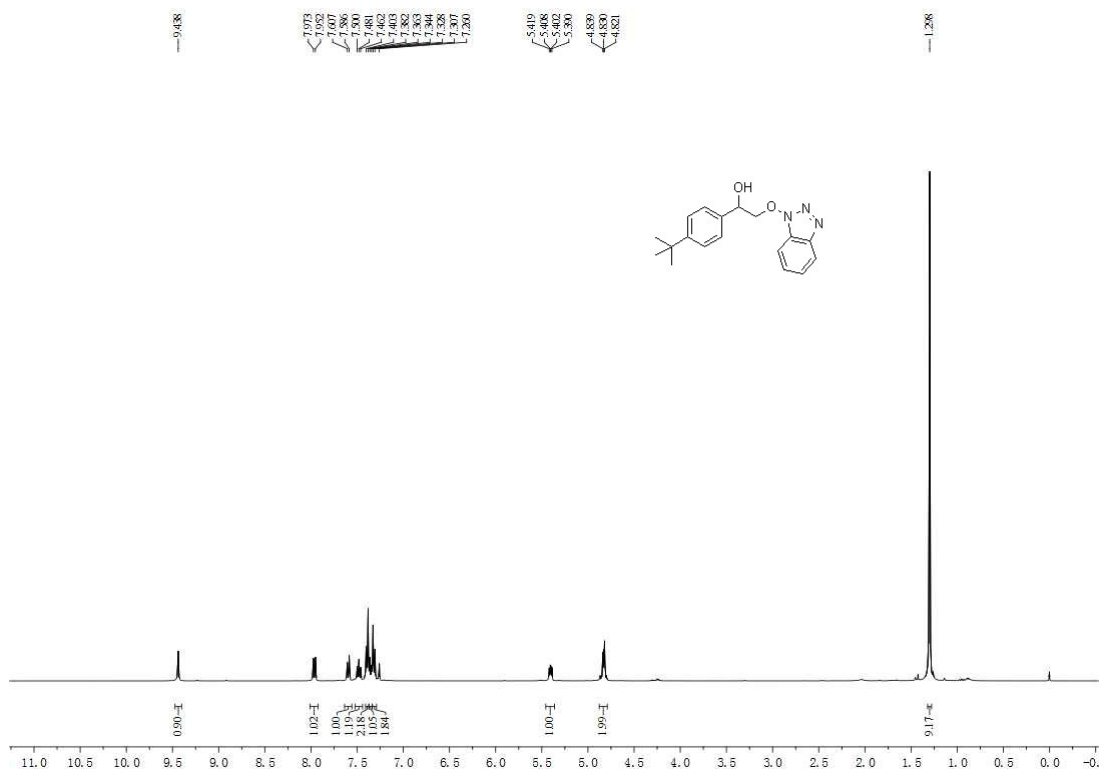

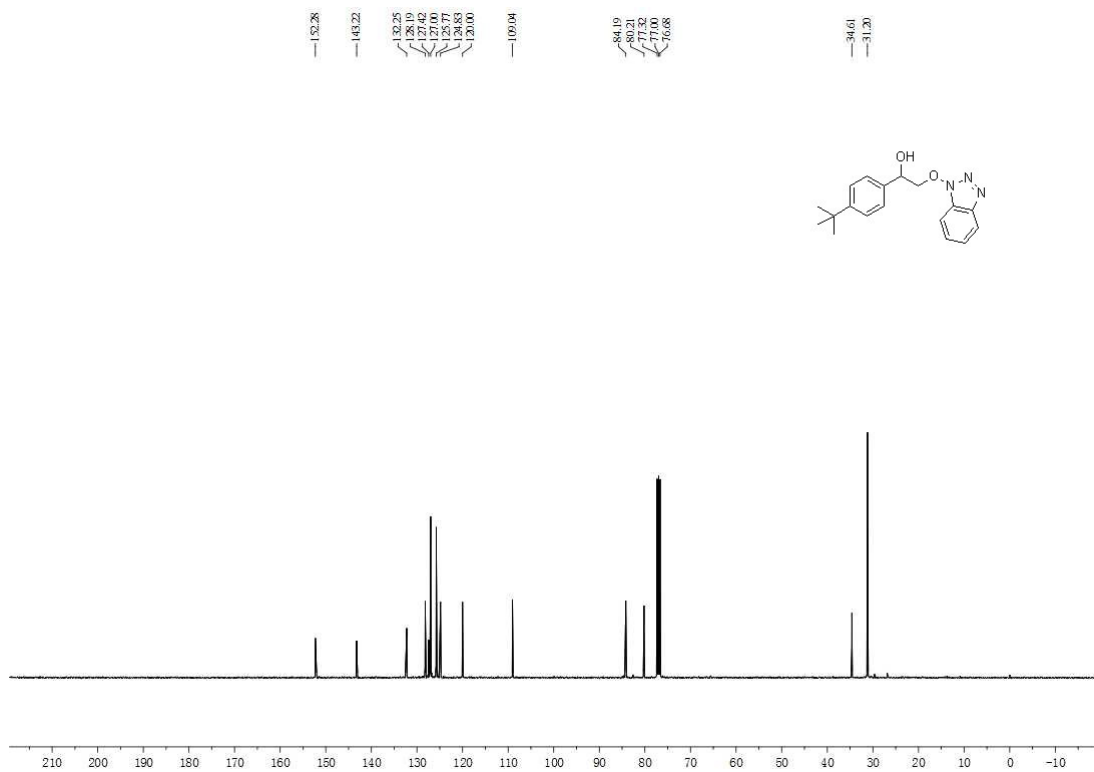

### Product 31

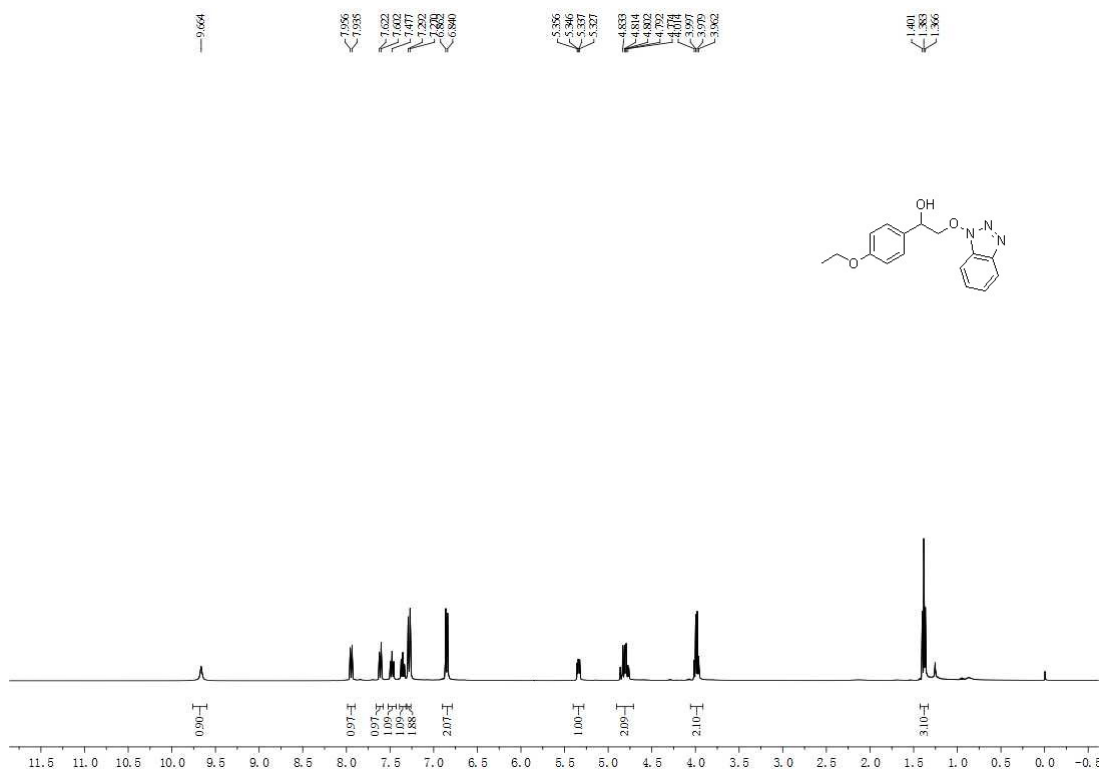

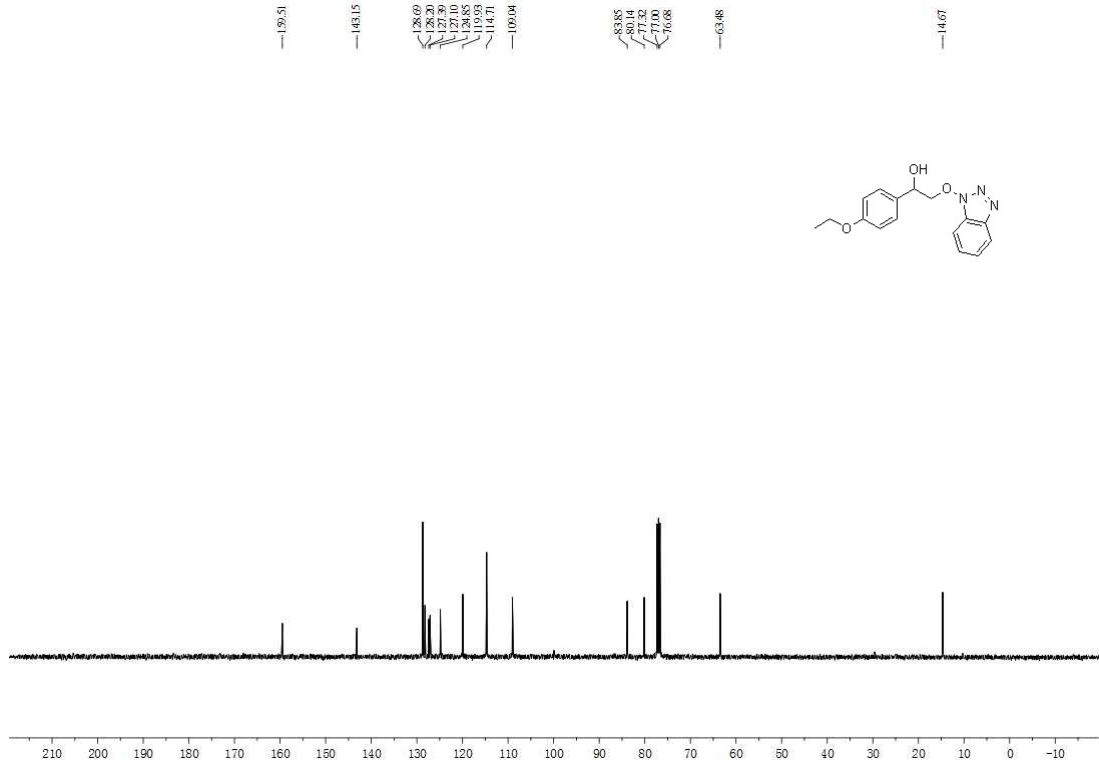

**Product 3m**

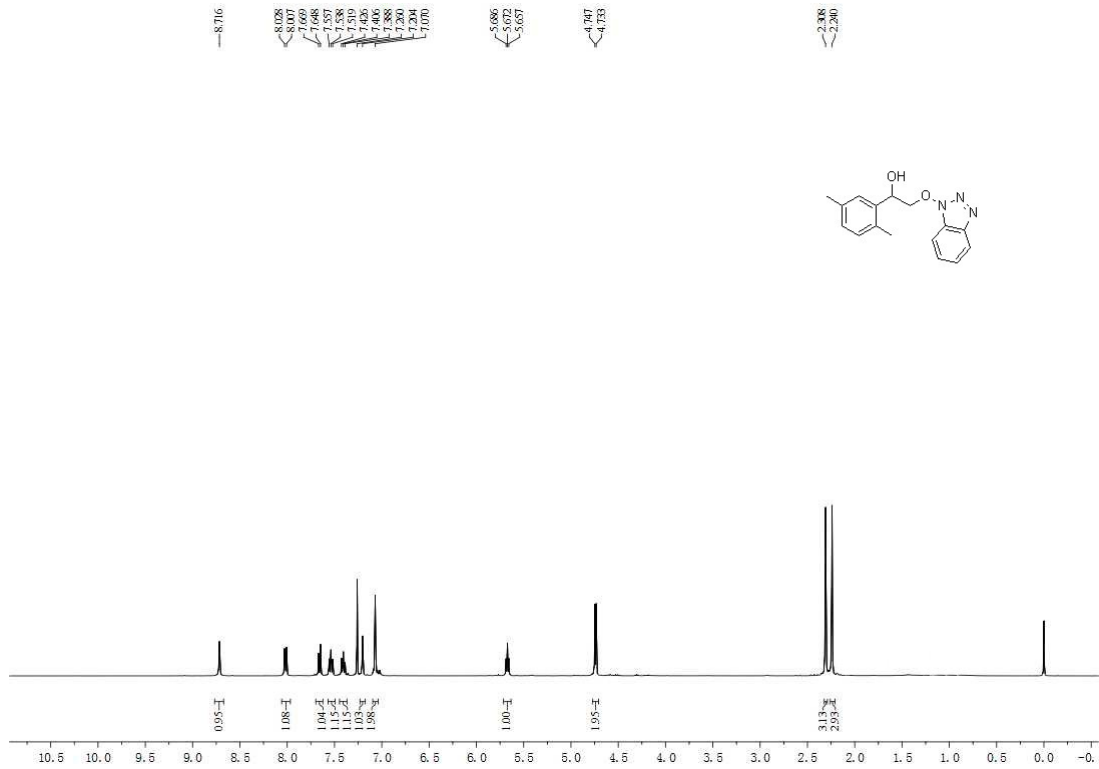

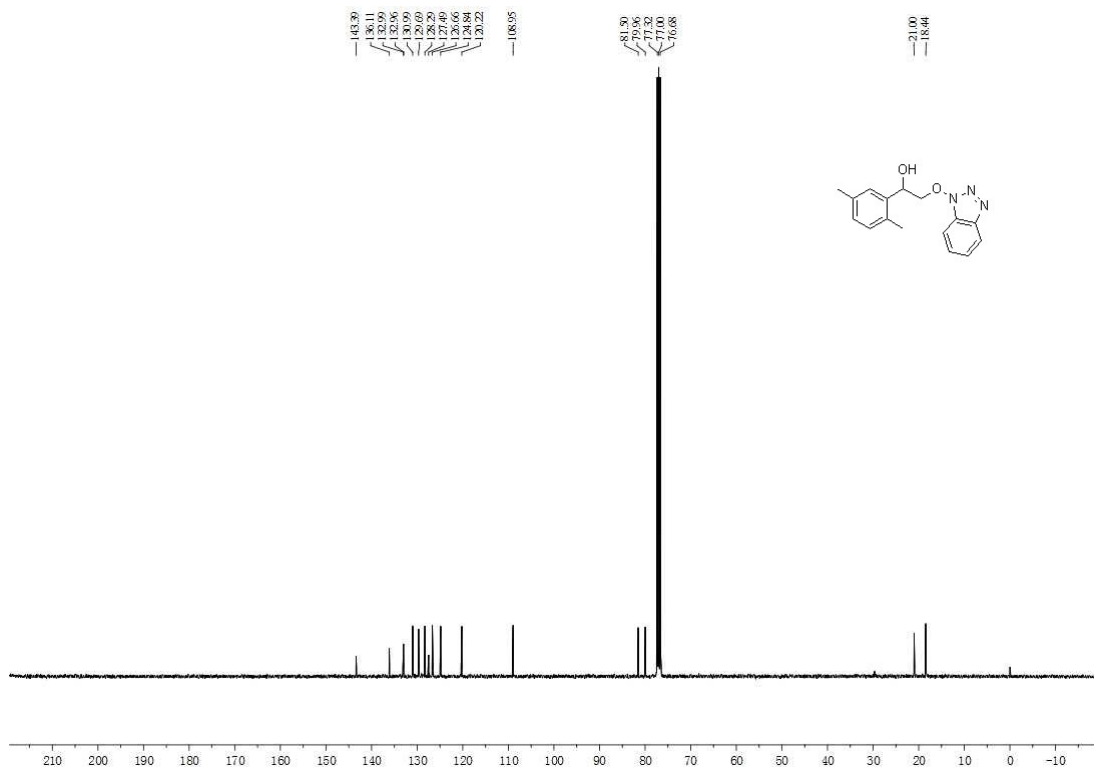

**Product 3n**

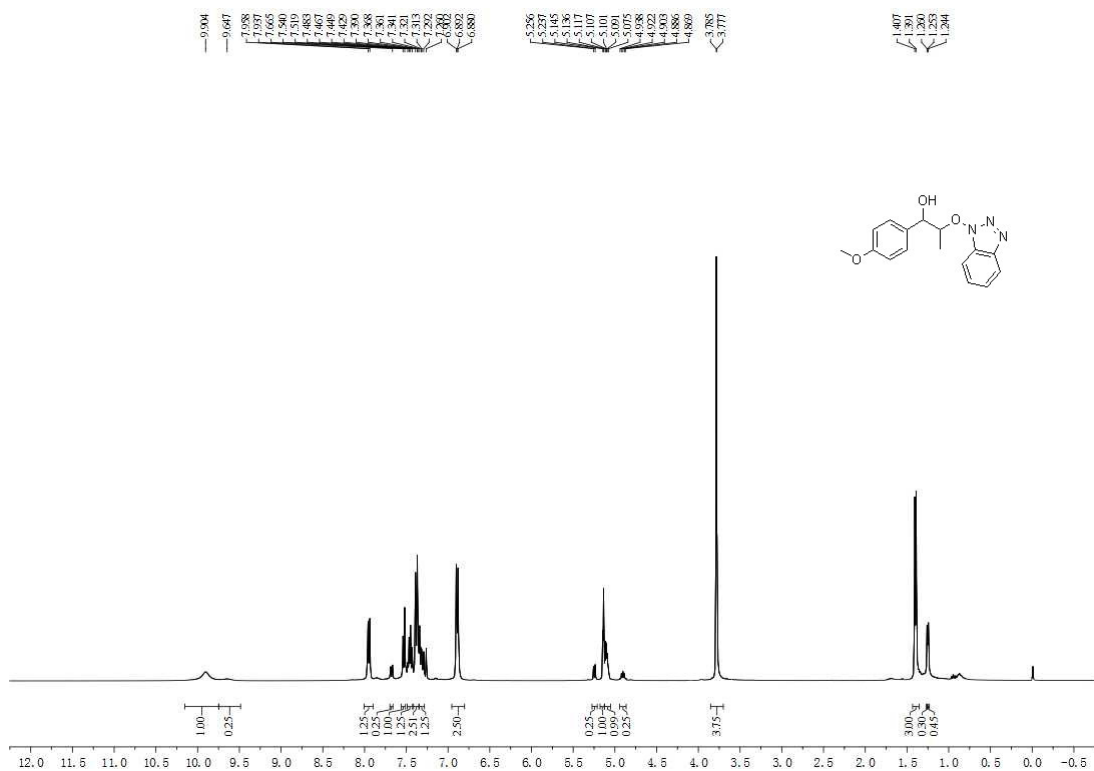

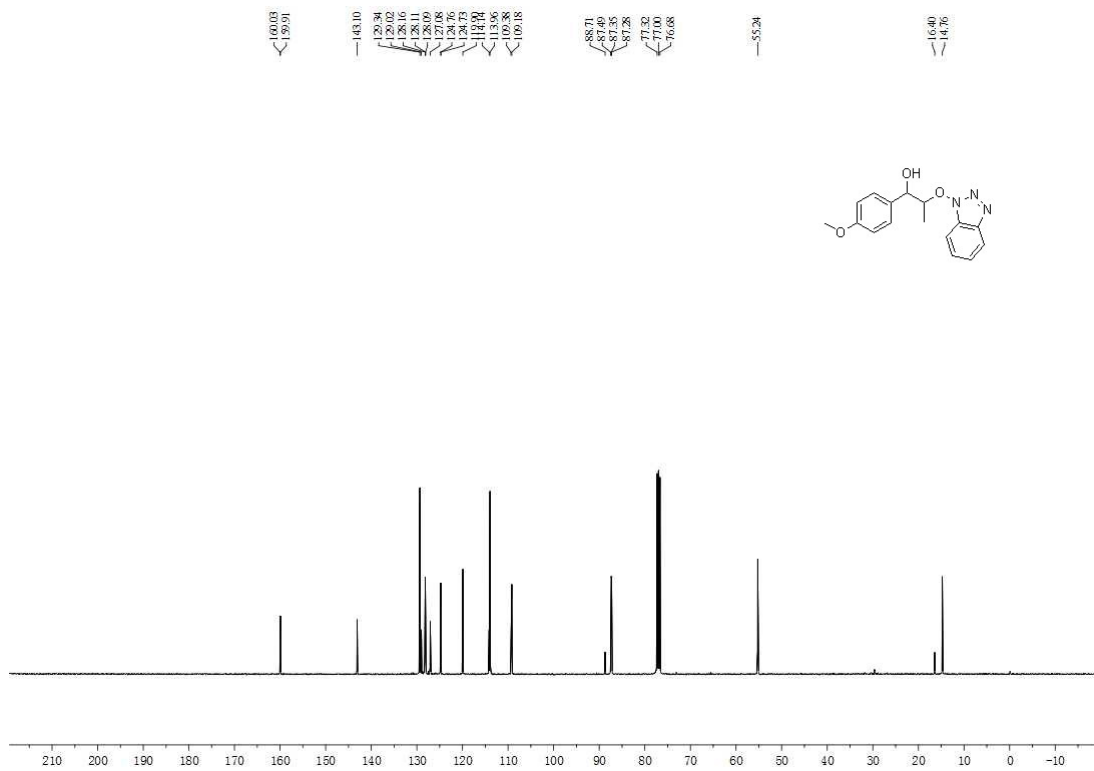

**Product 3o**

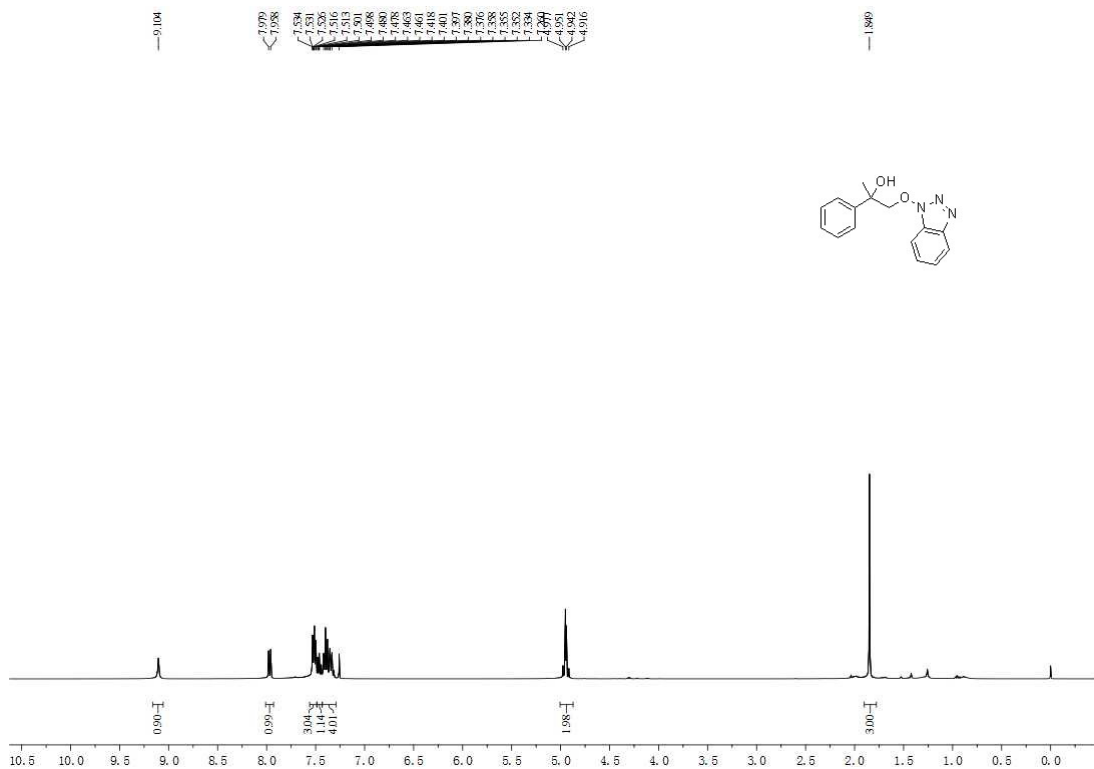

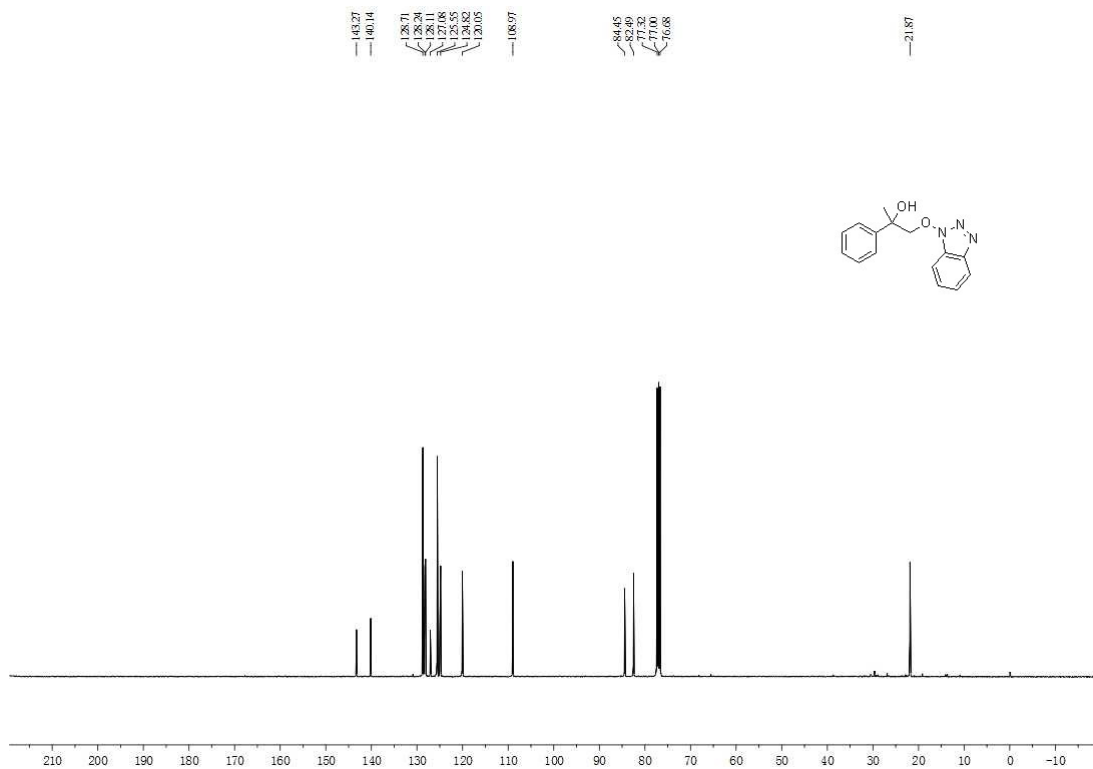

**Product 3p**

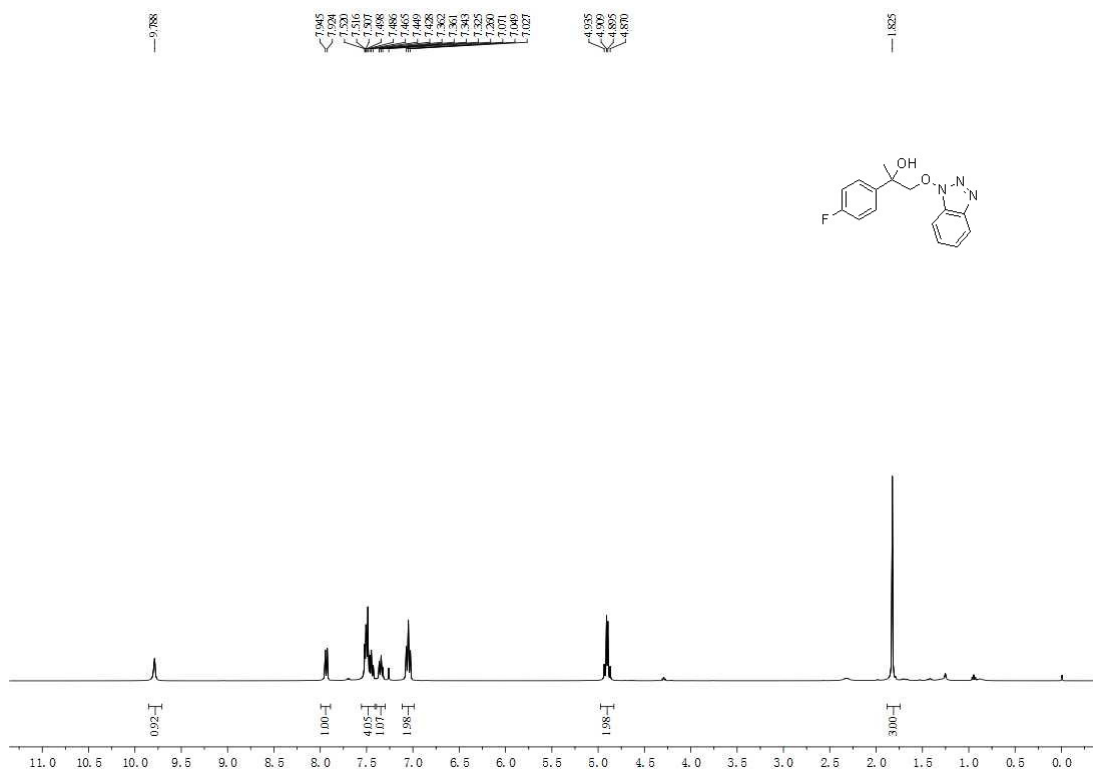



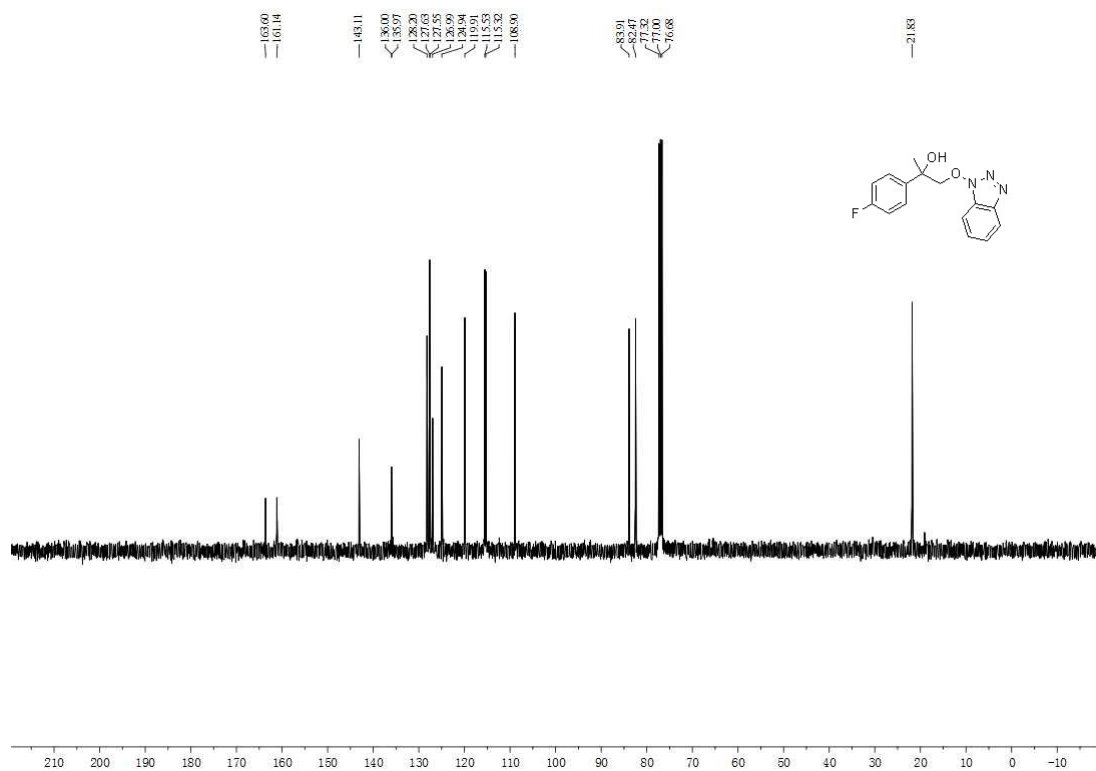

**Product 3q**

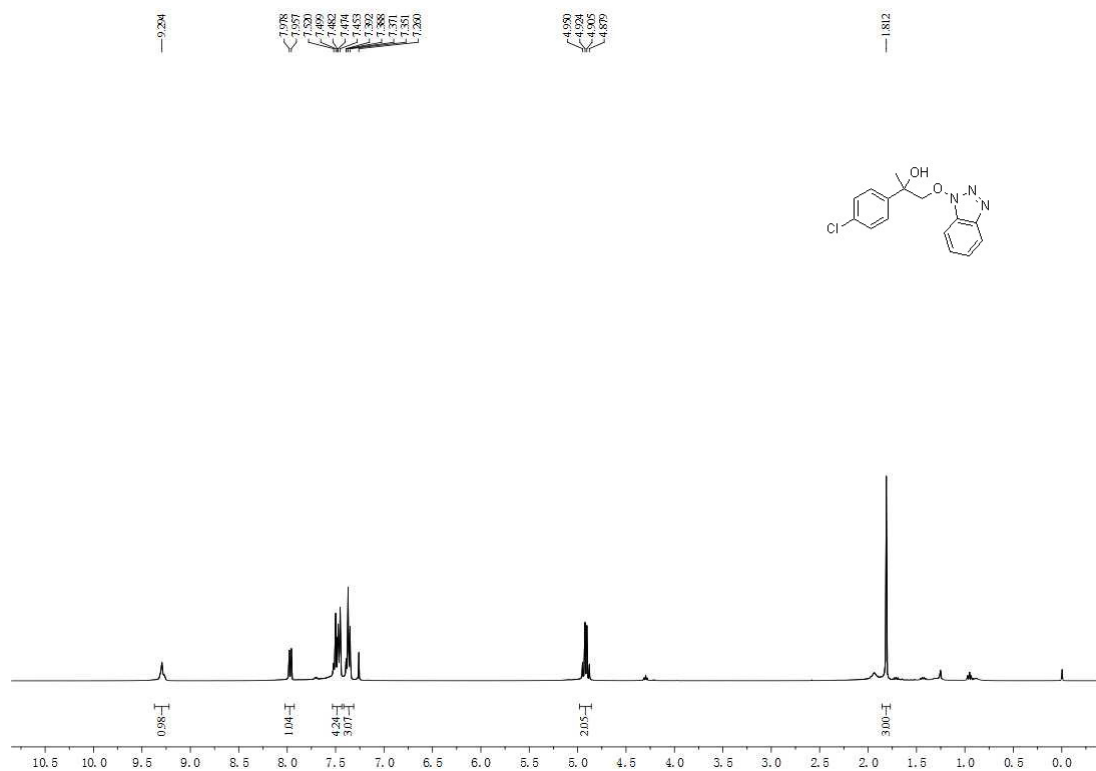

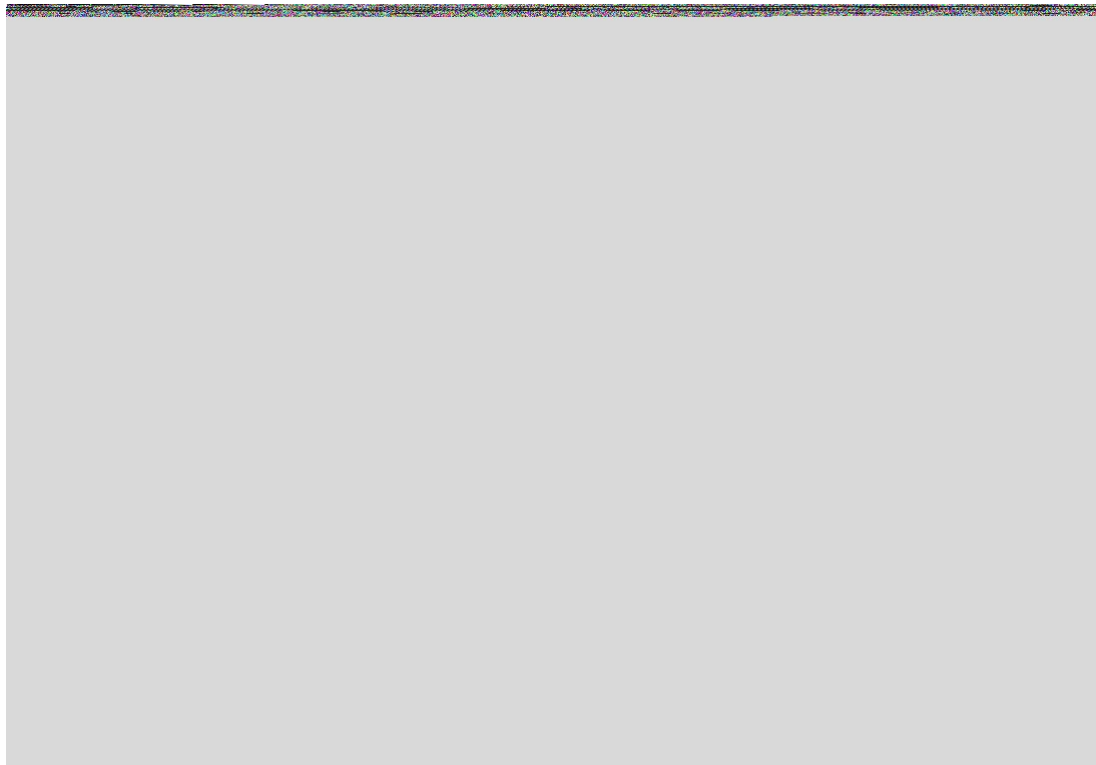

**Product 3r**

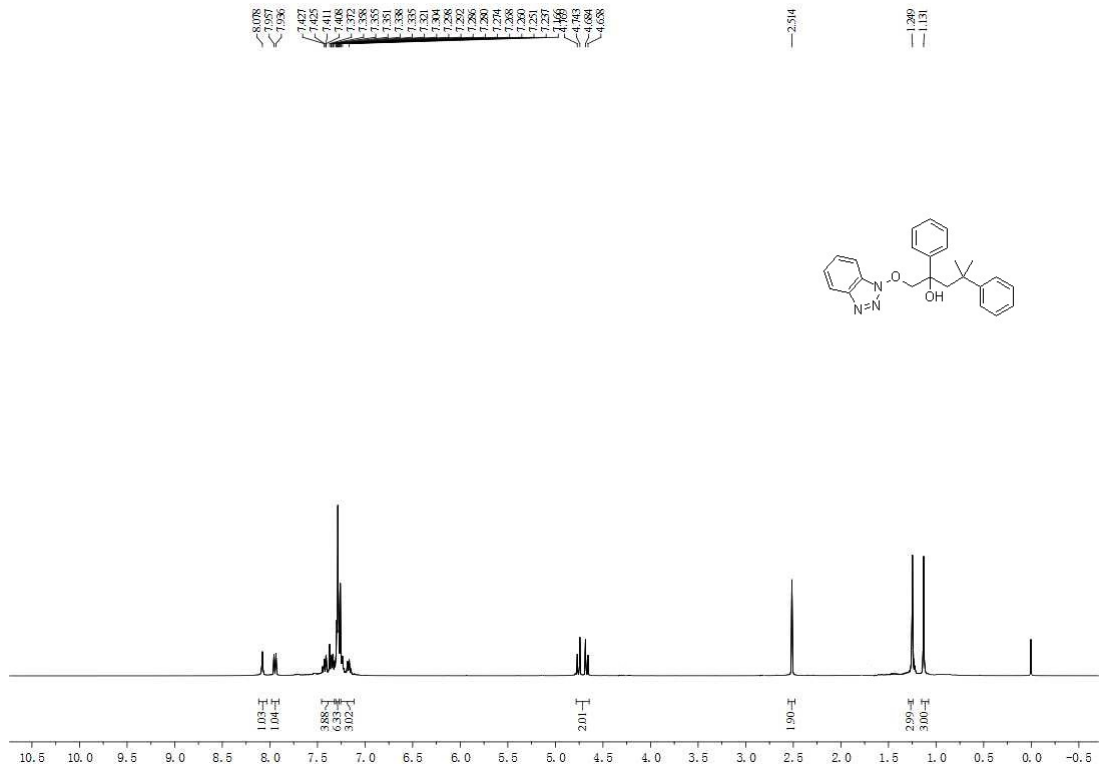

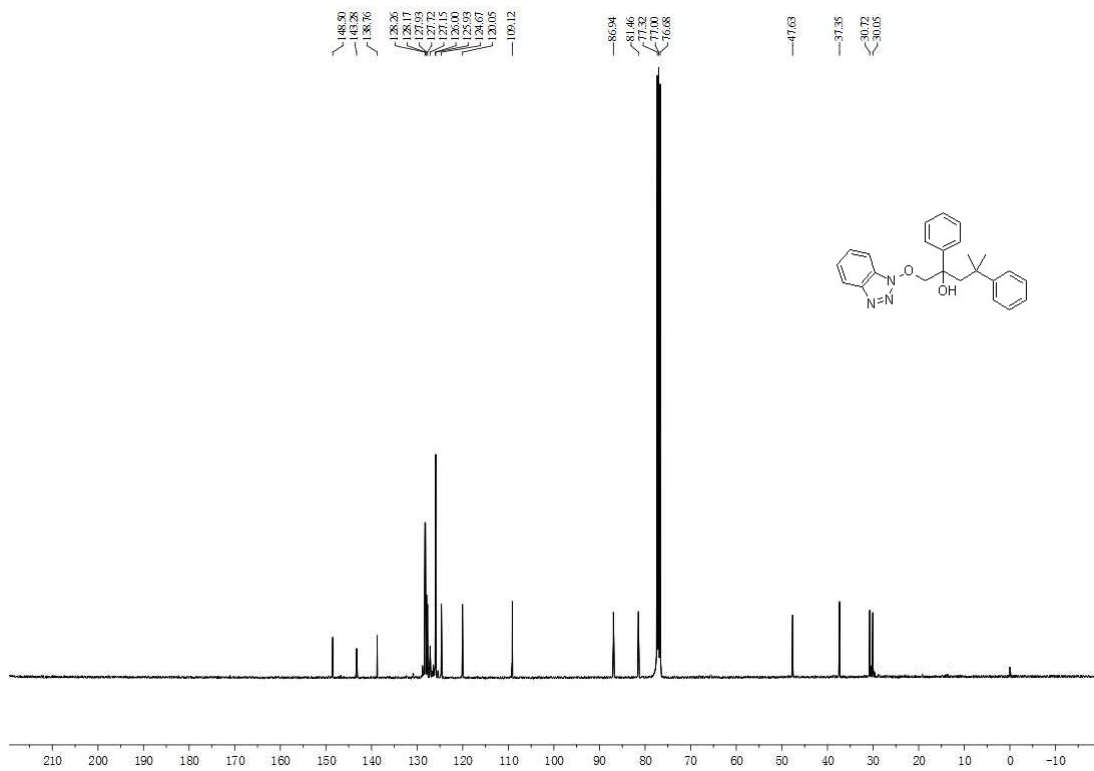

### Product 3s

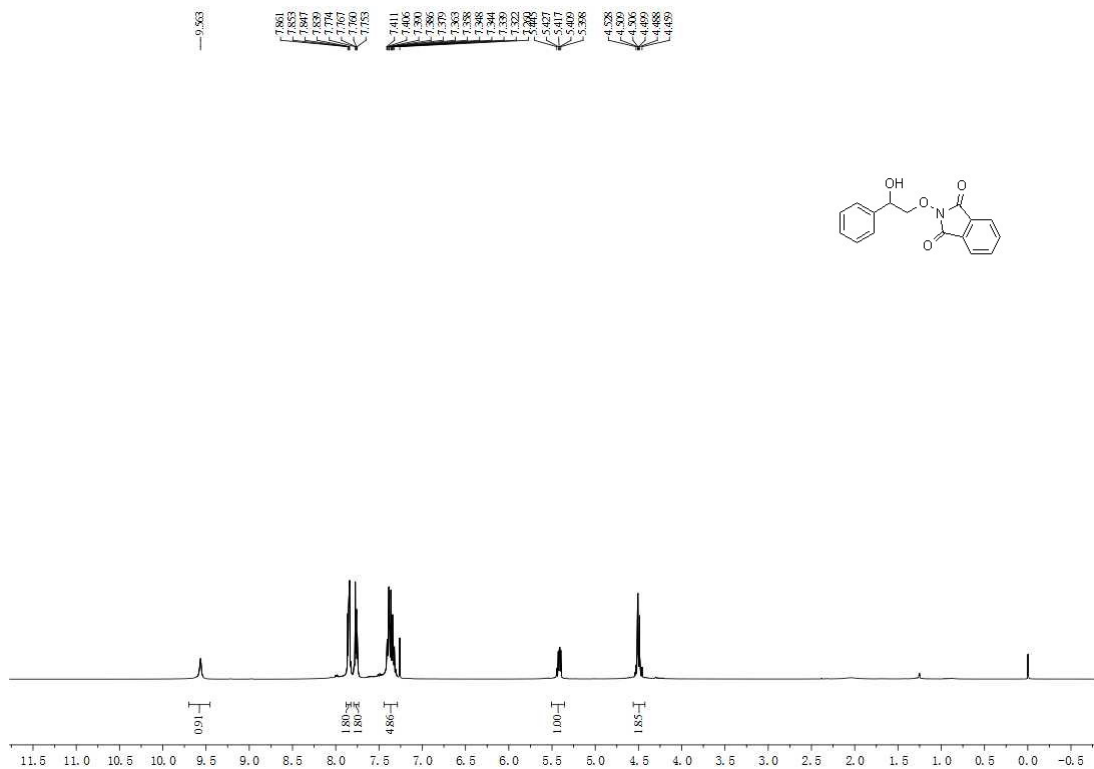

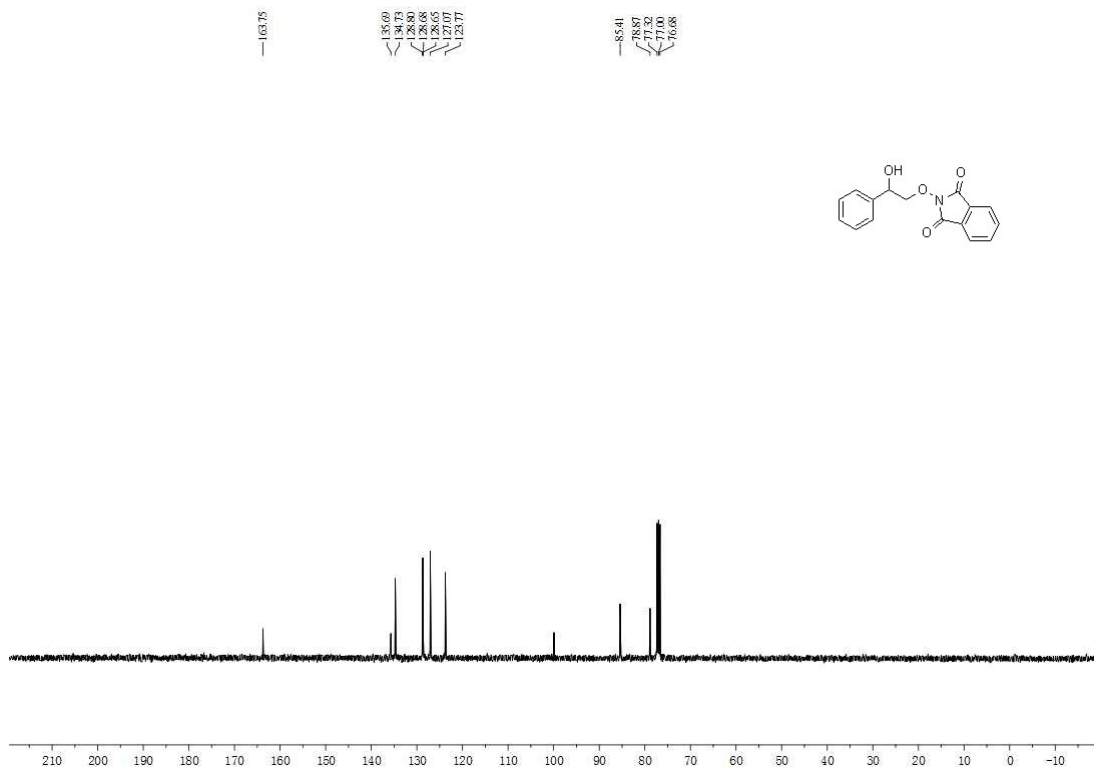

### Product 3t

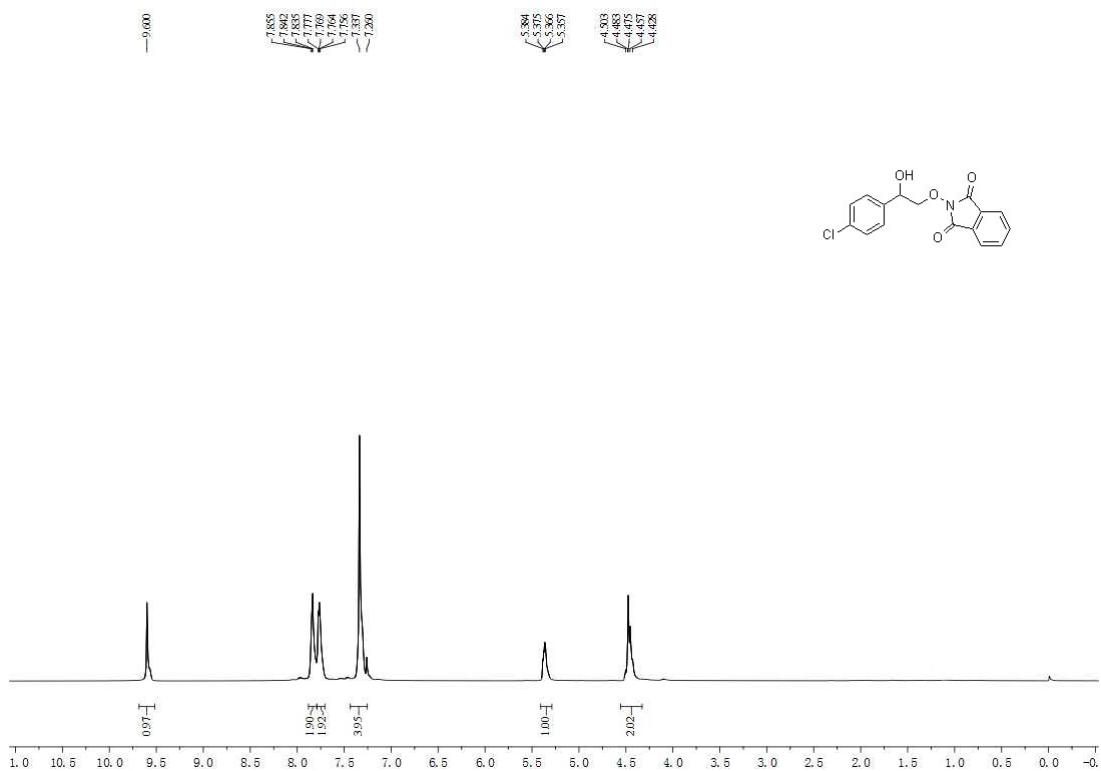

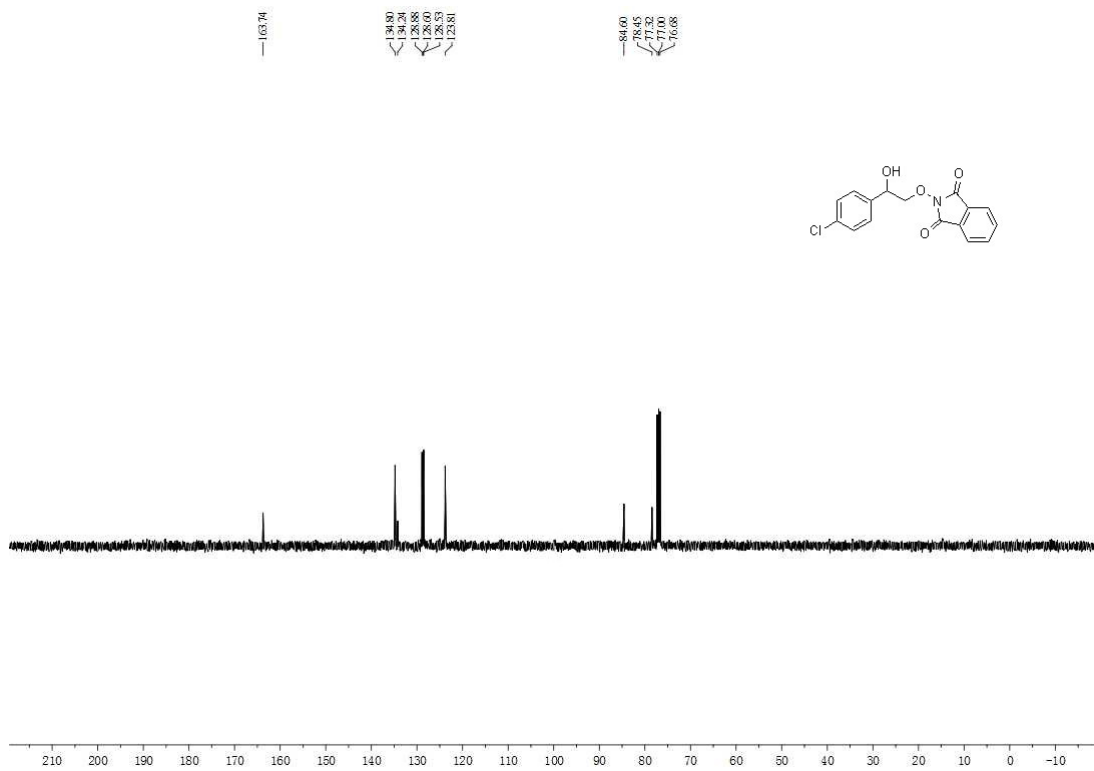

### Product 3u

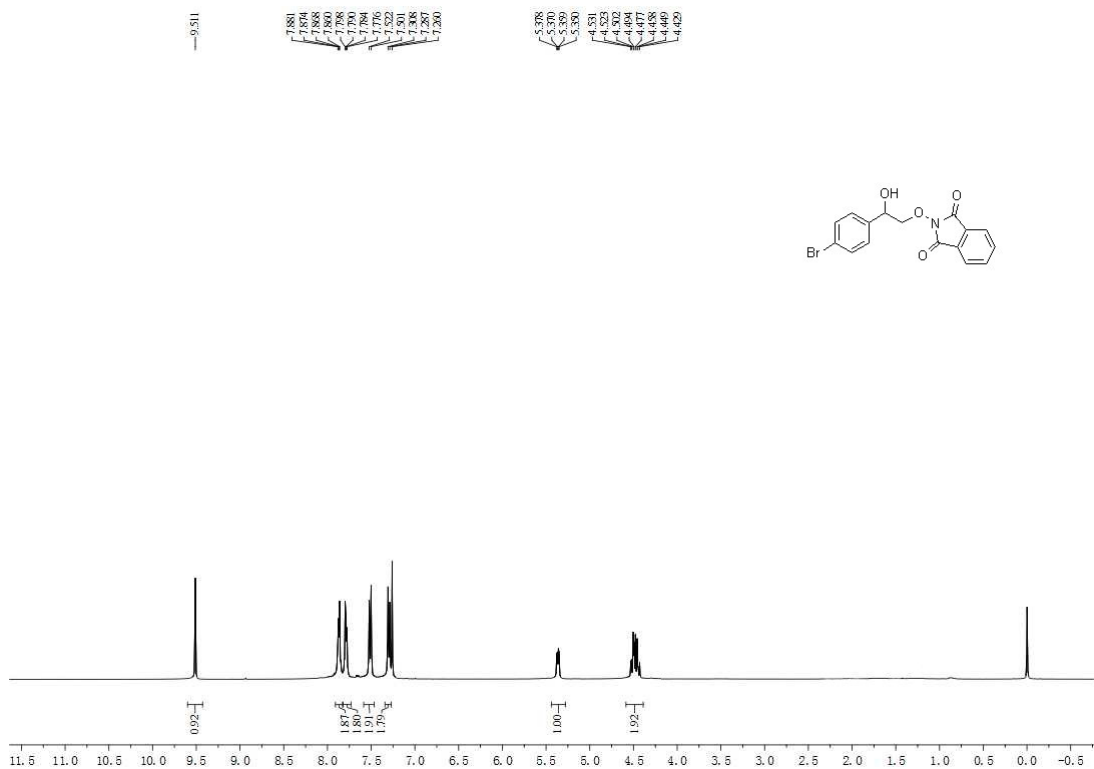

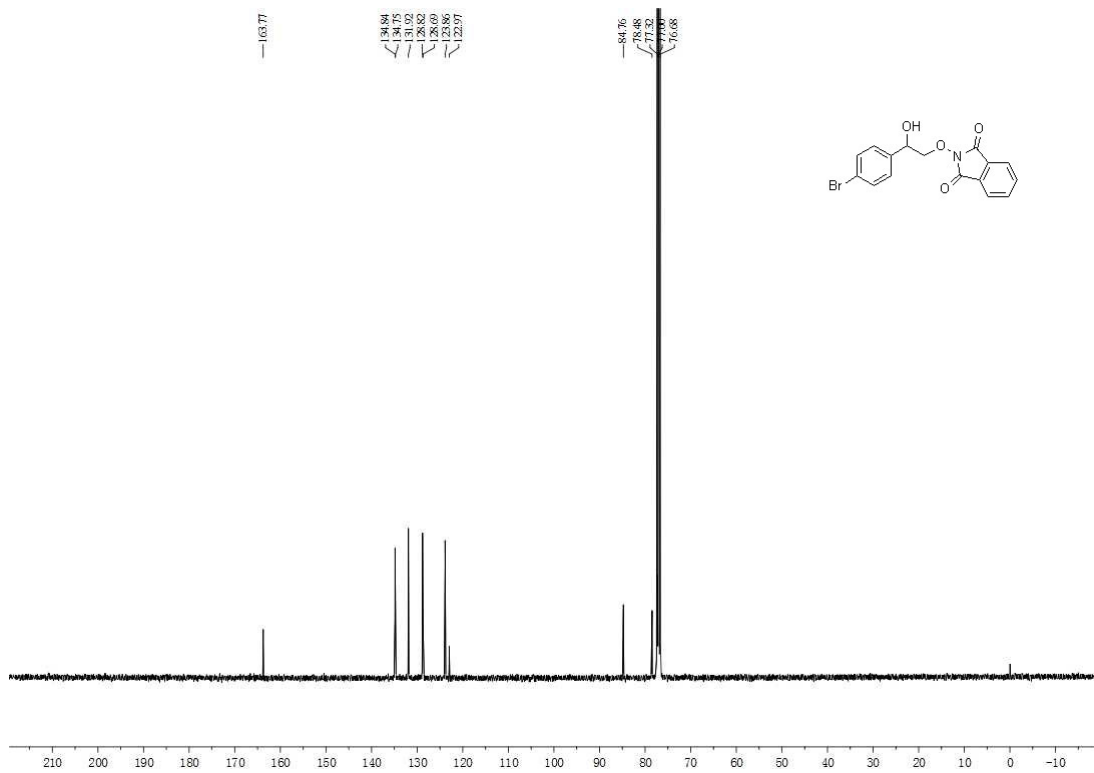

**Product 3v**

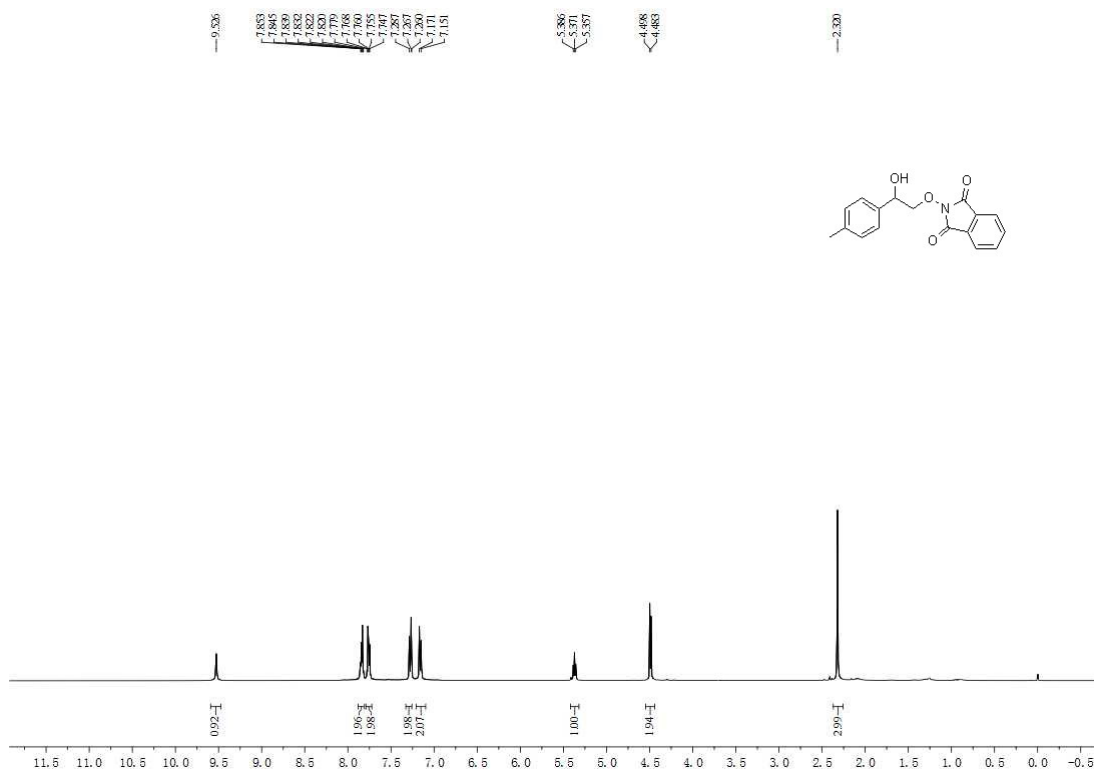

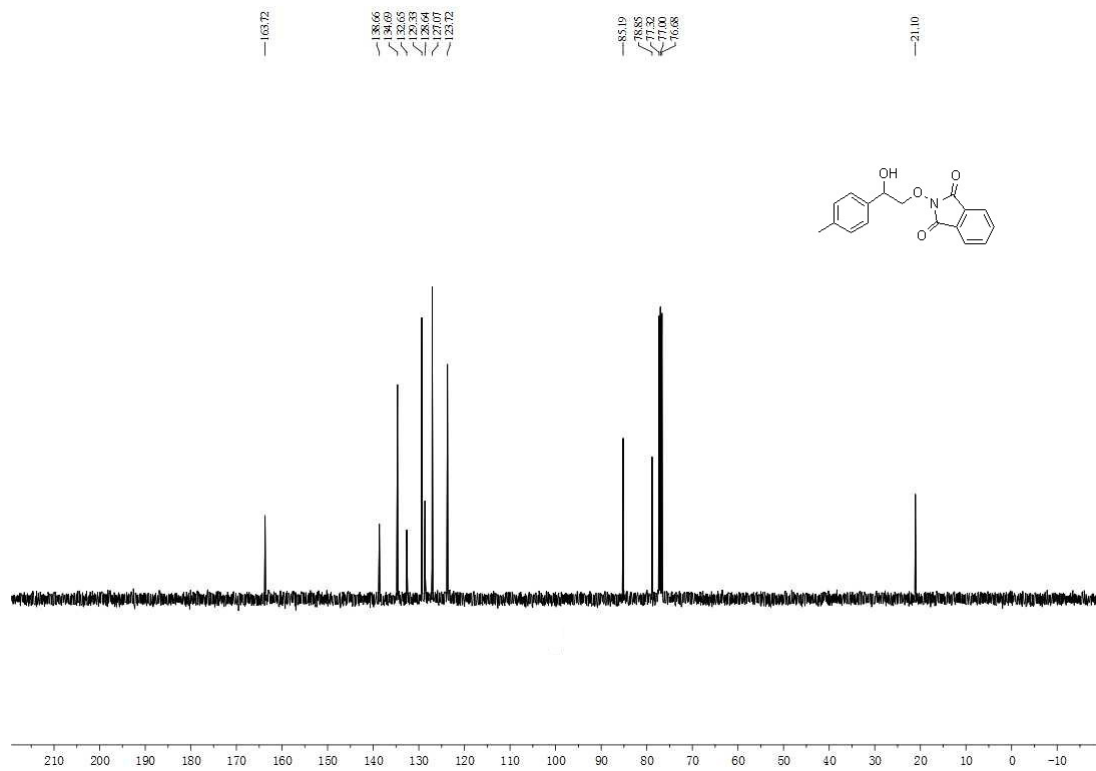

**Product 3w**

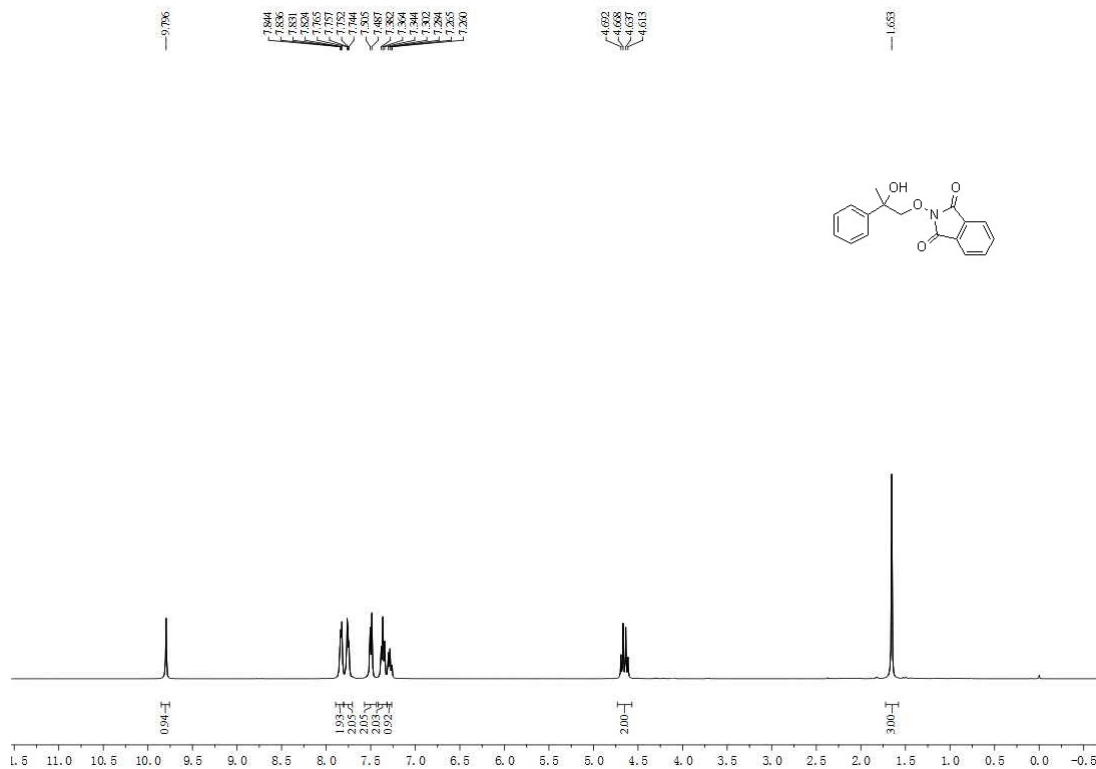





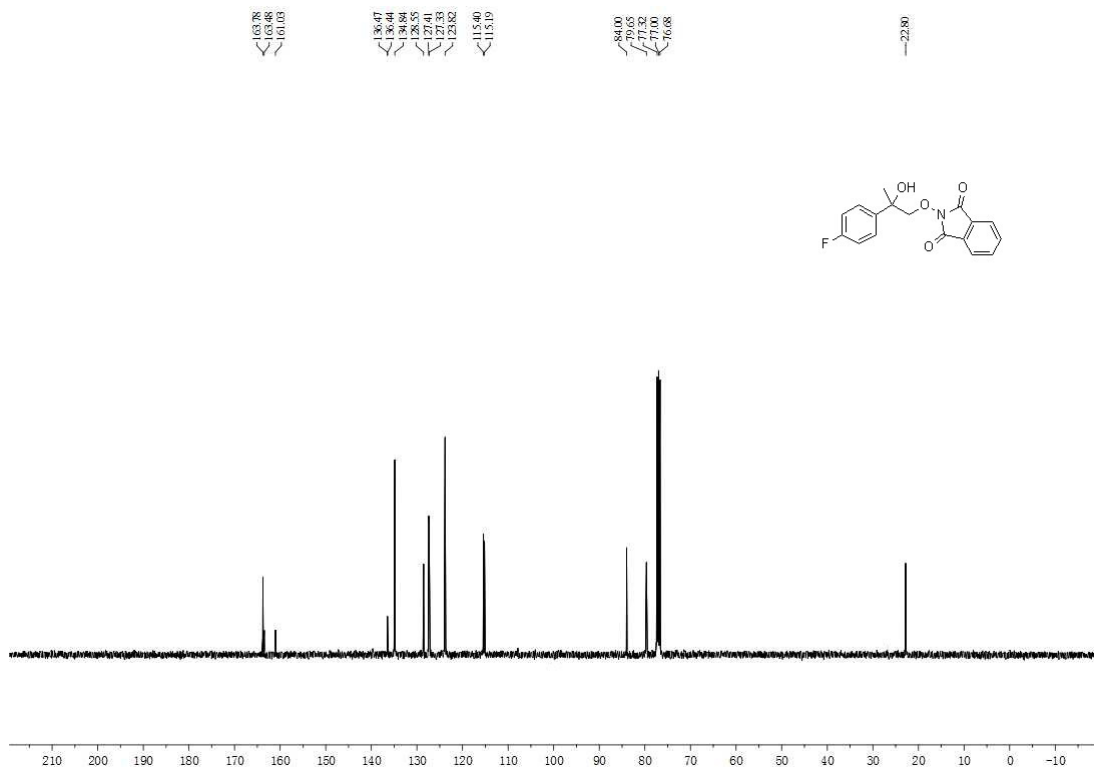

### Product 3y

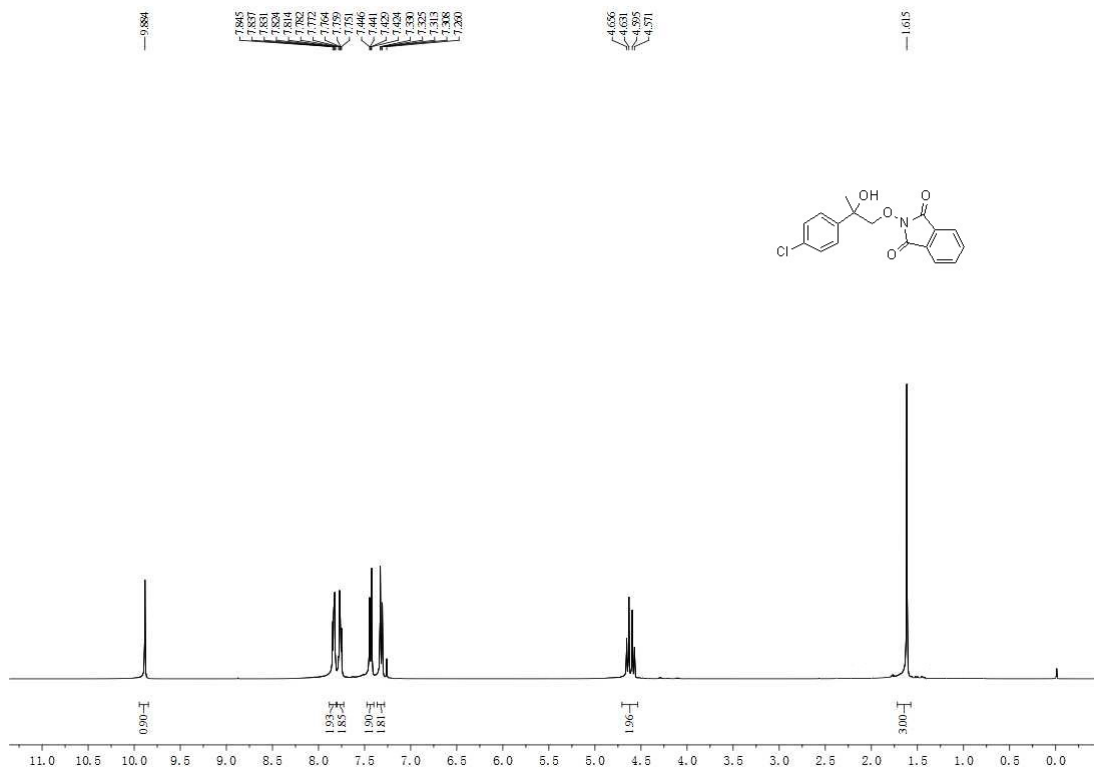

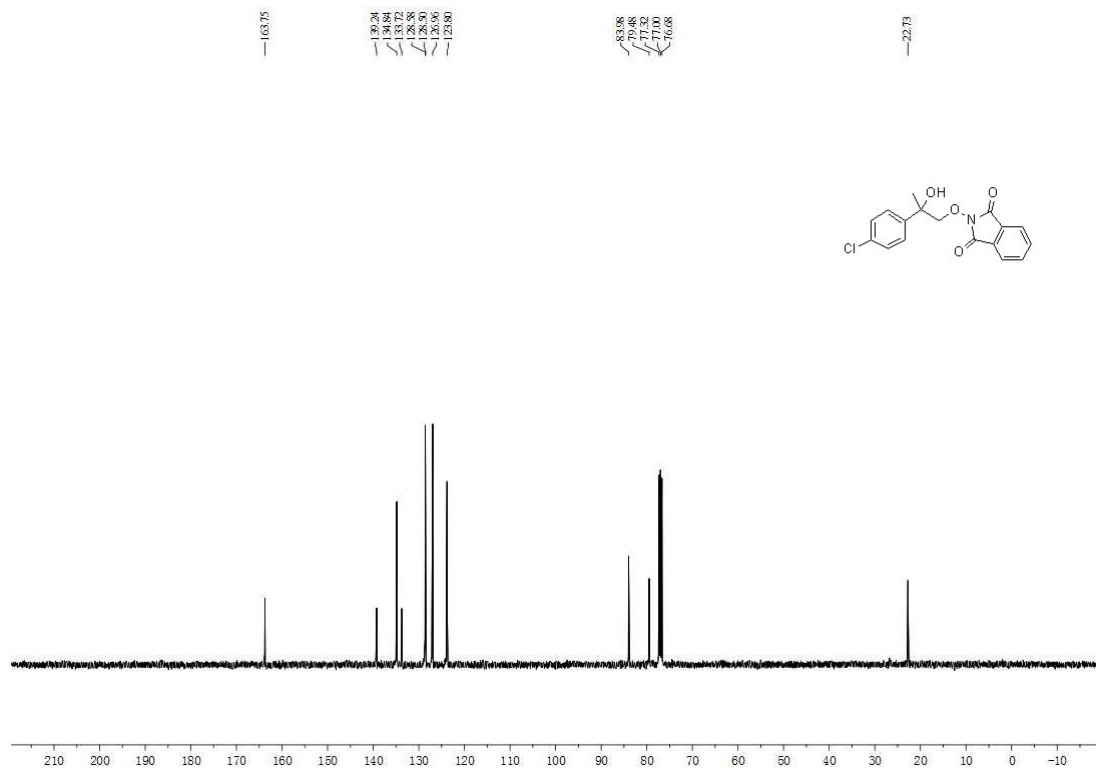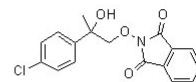

**Product 4a**

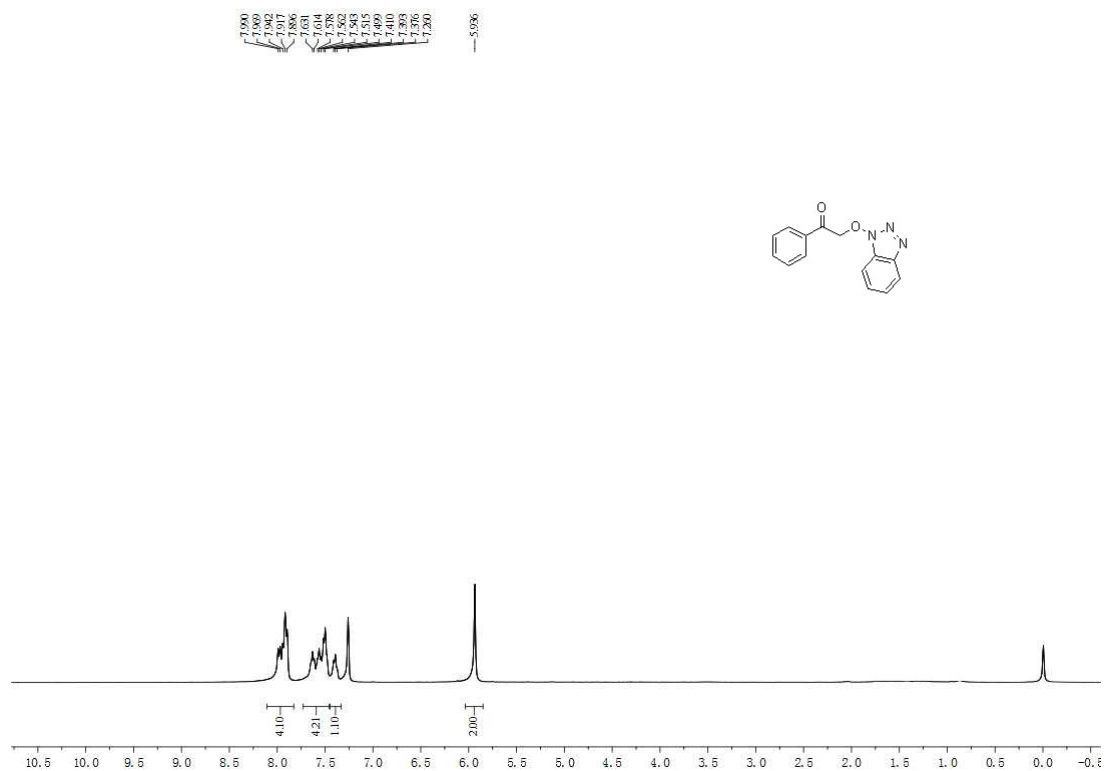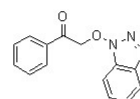

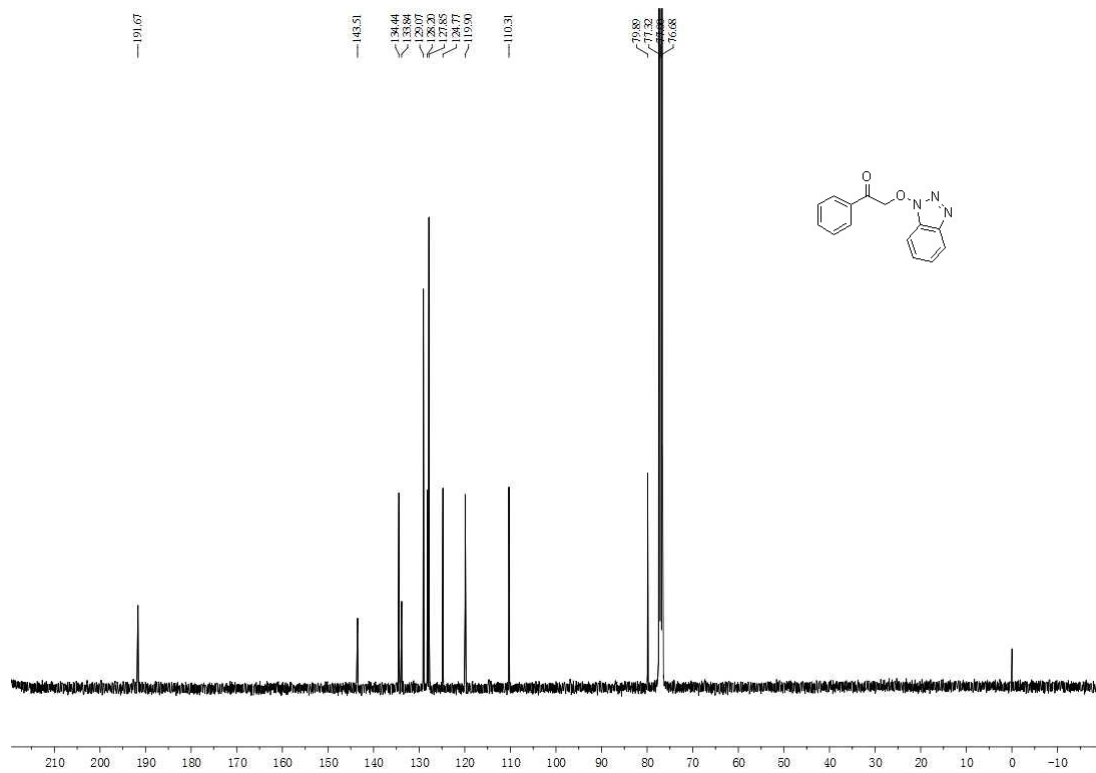

**Product 4b**

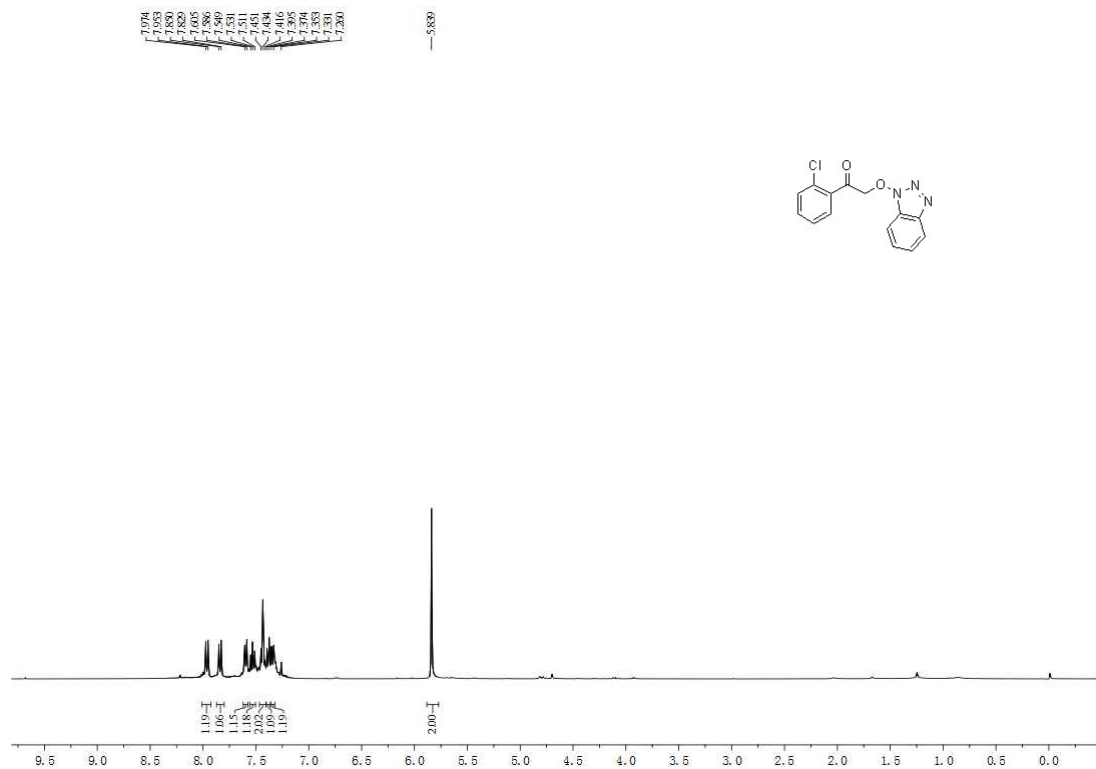

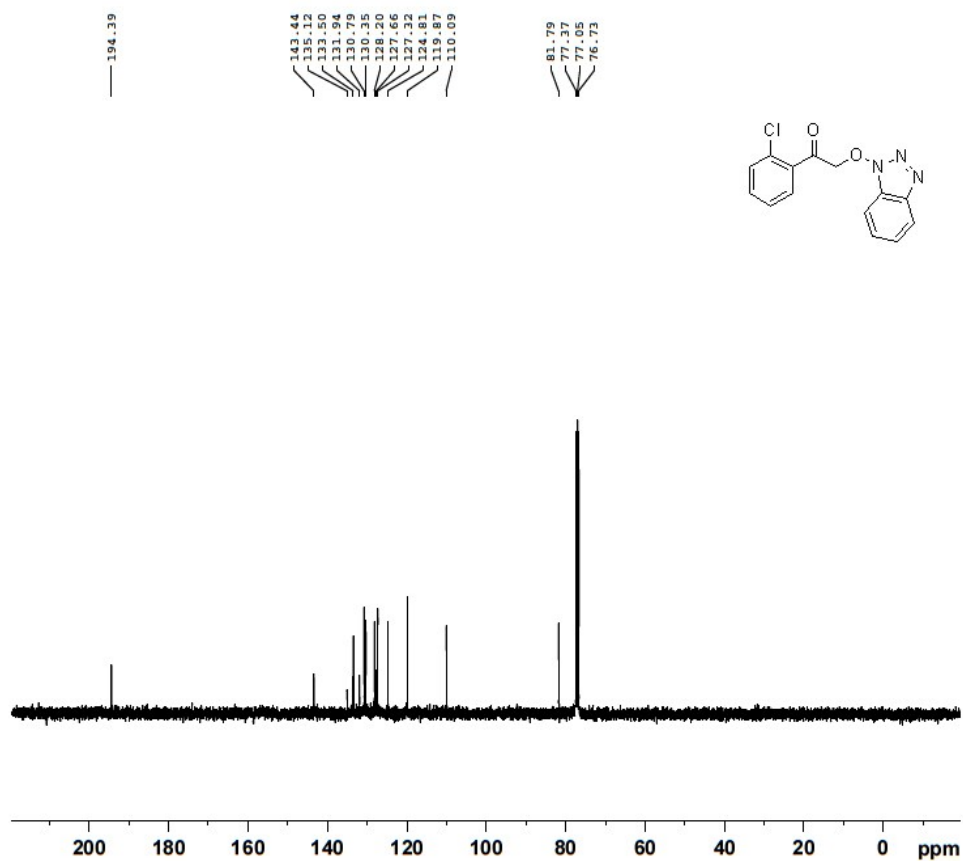

**Product 4c**

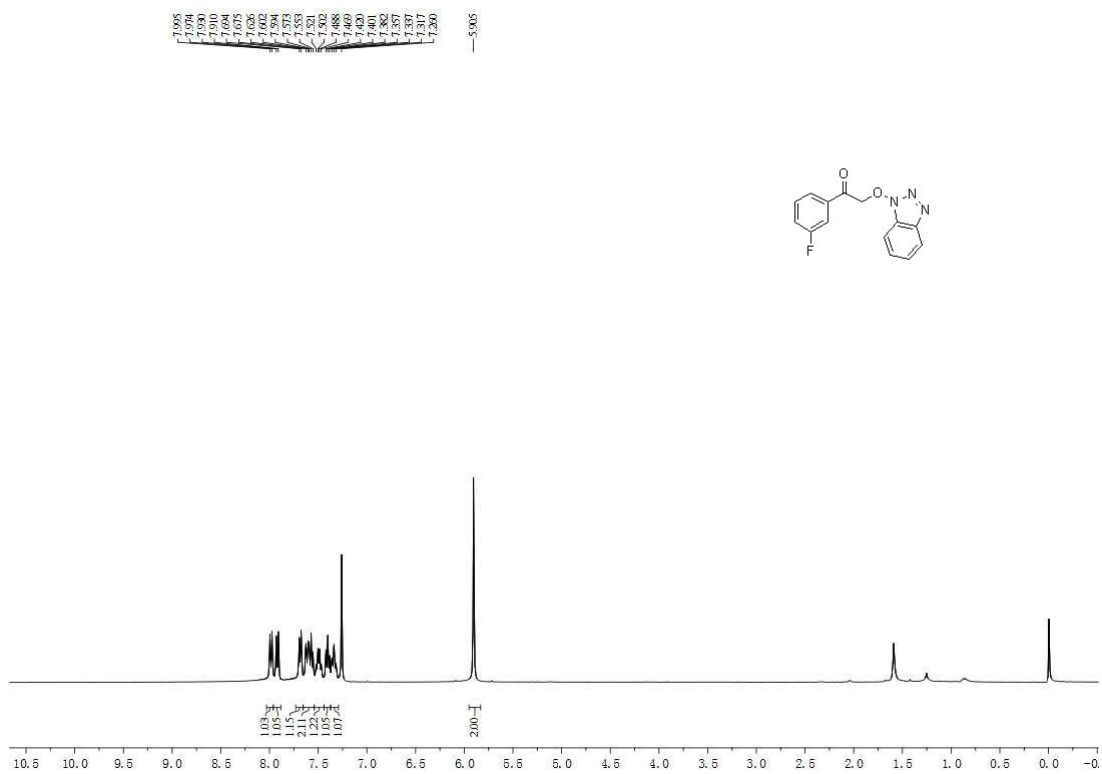

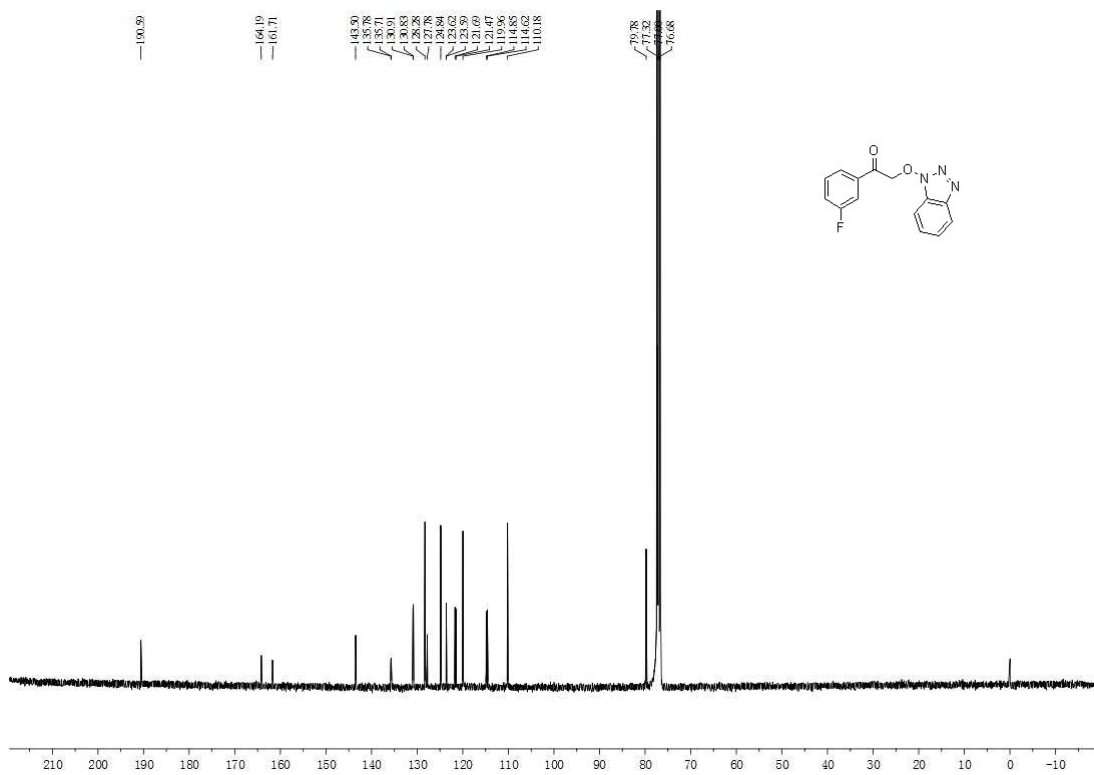

**Product 4d**

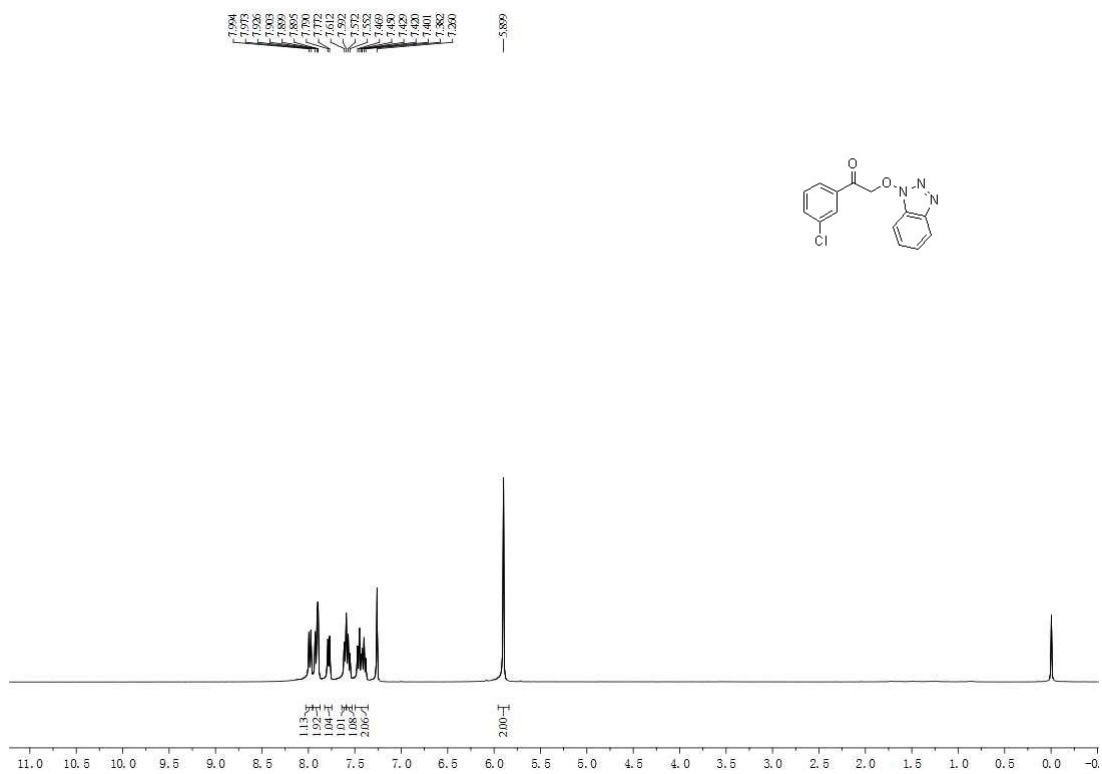

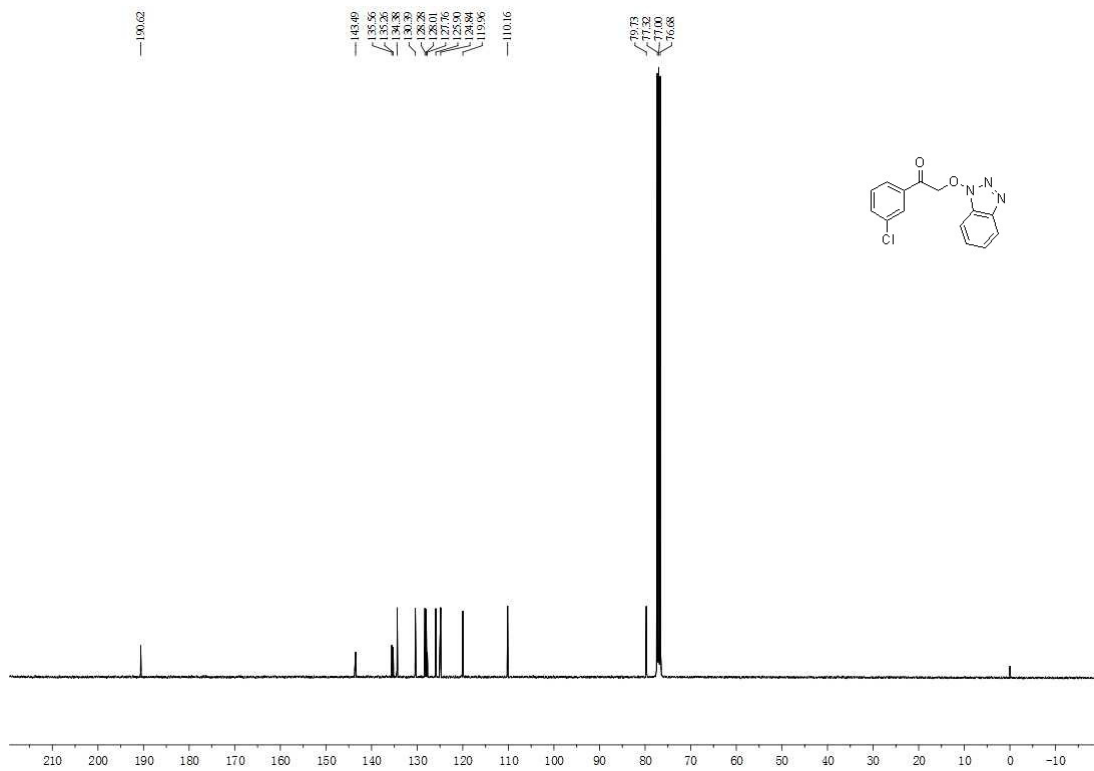

**Product 4e**

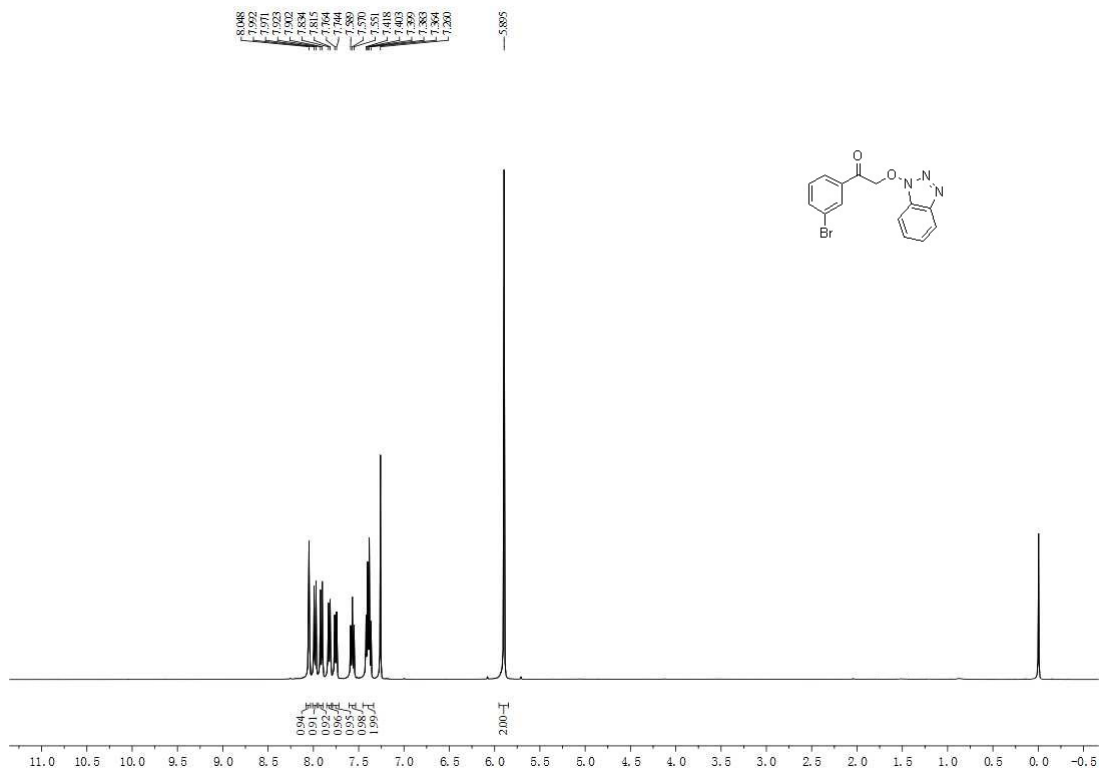

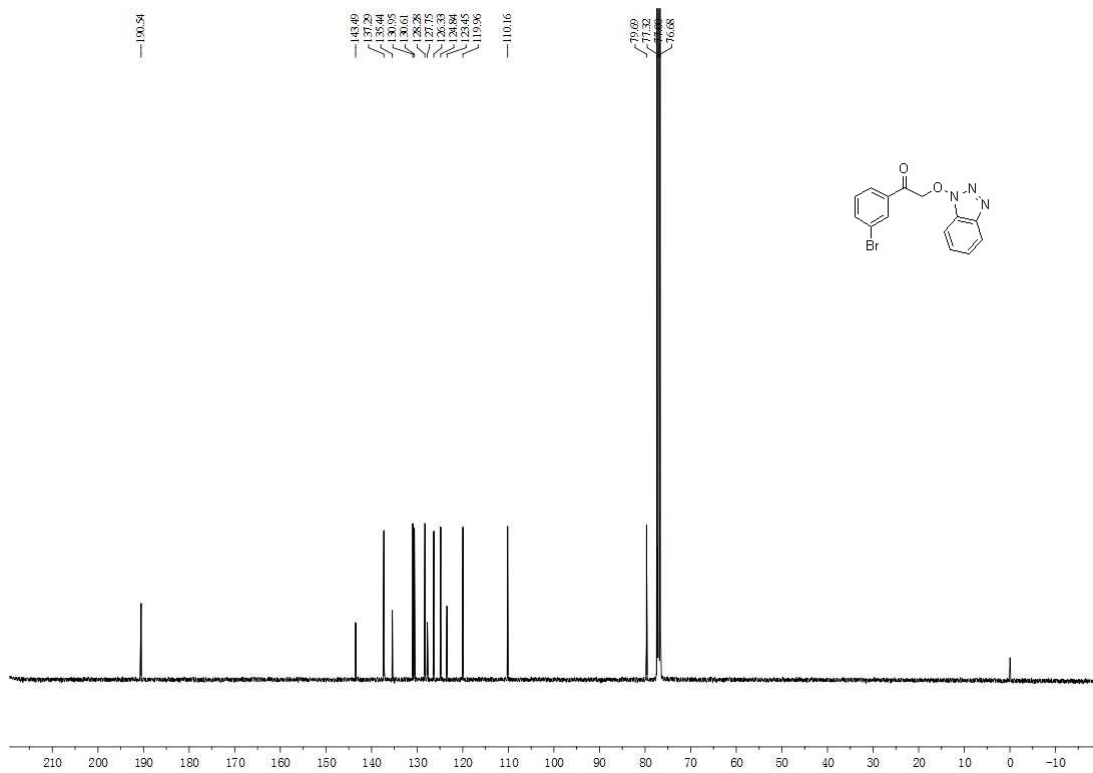

**Product 4f**

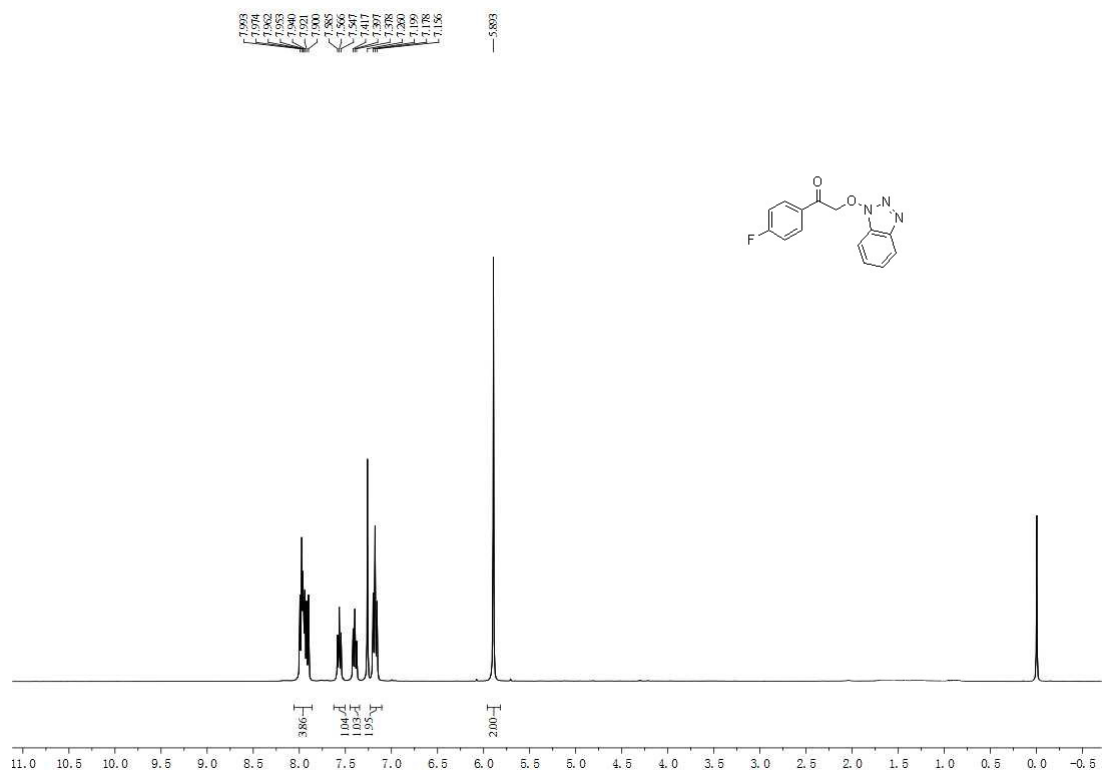





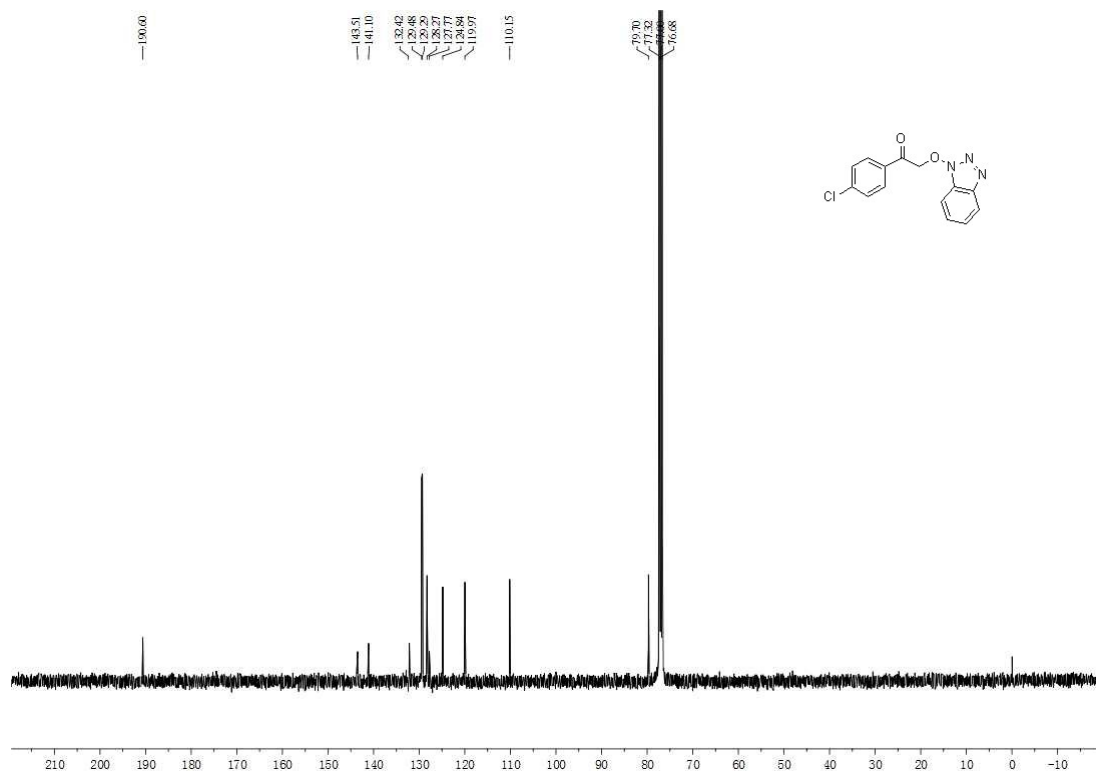

**Product 4h**

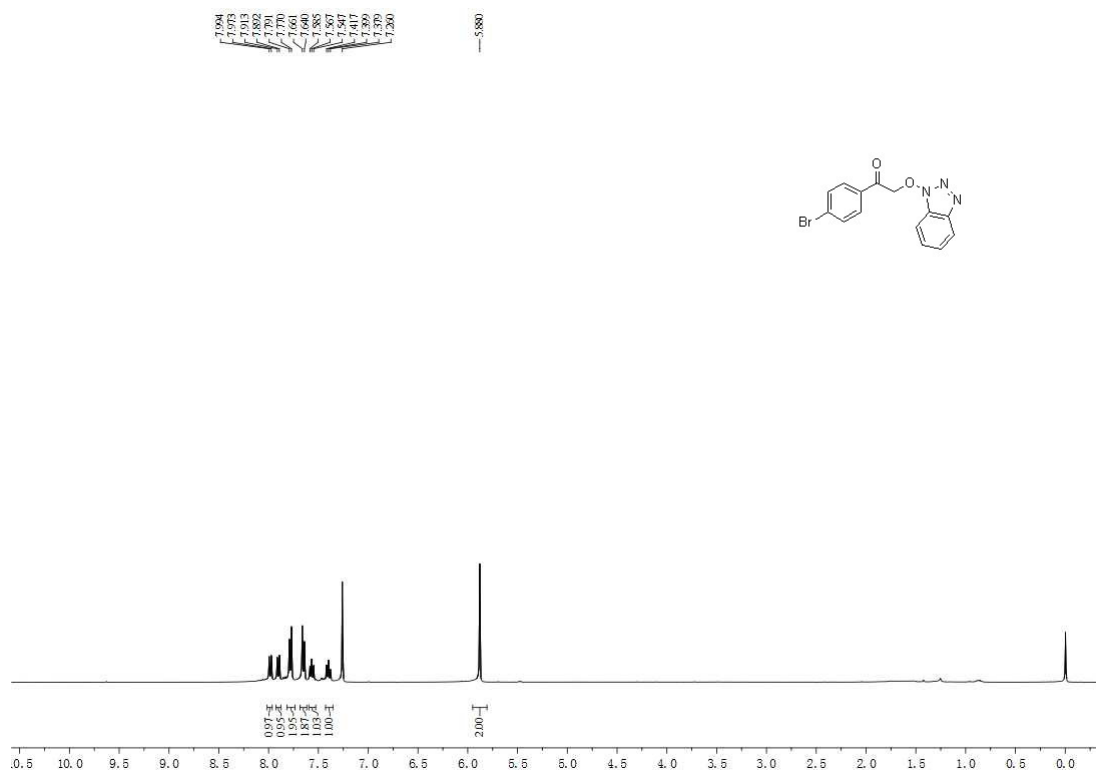

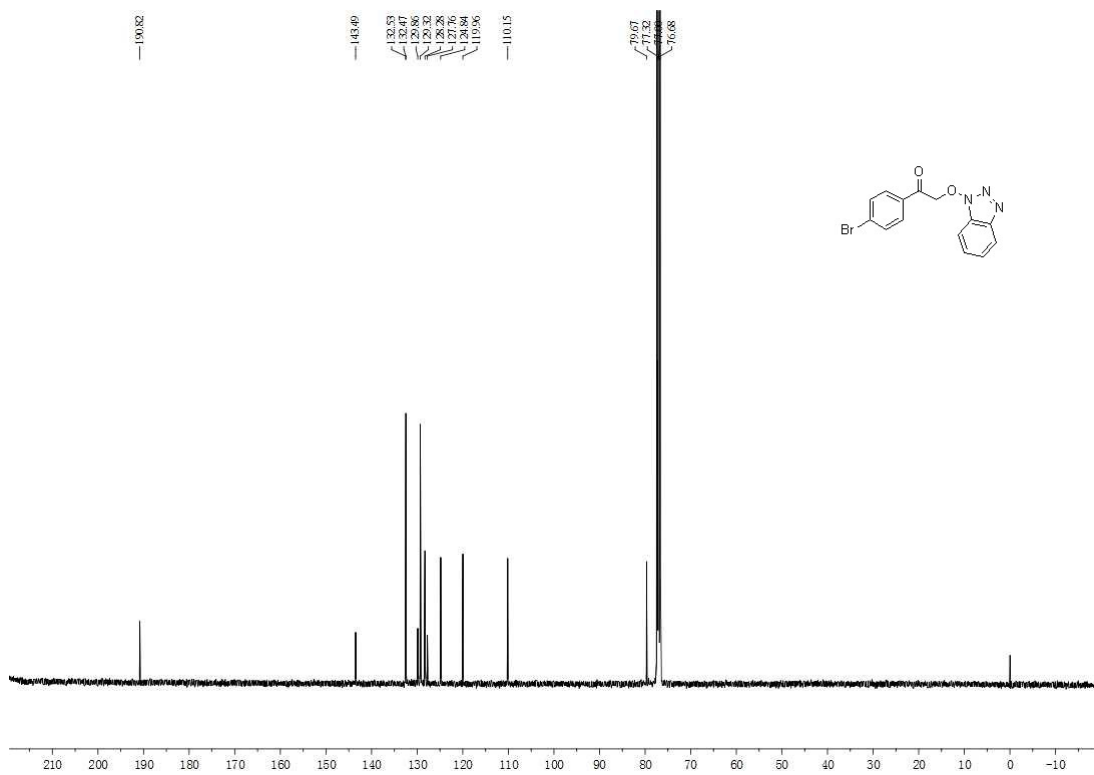

**Product 4i**

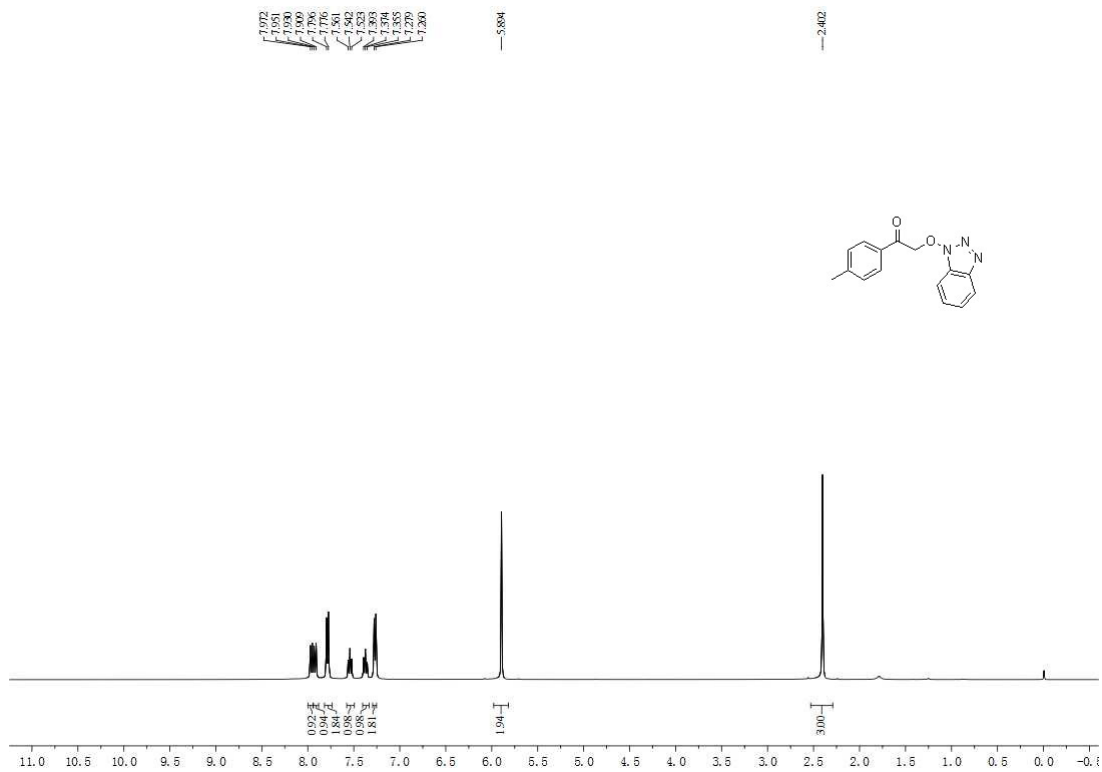

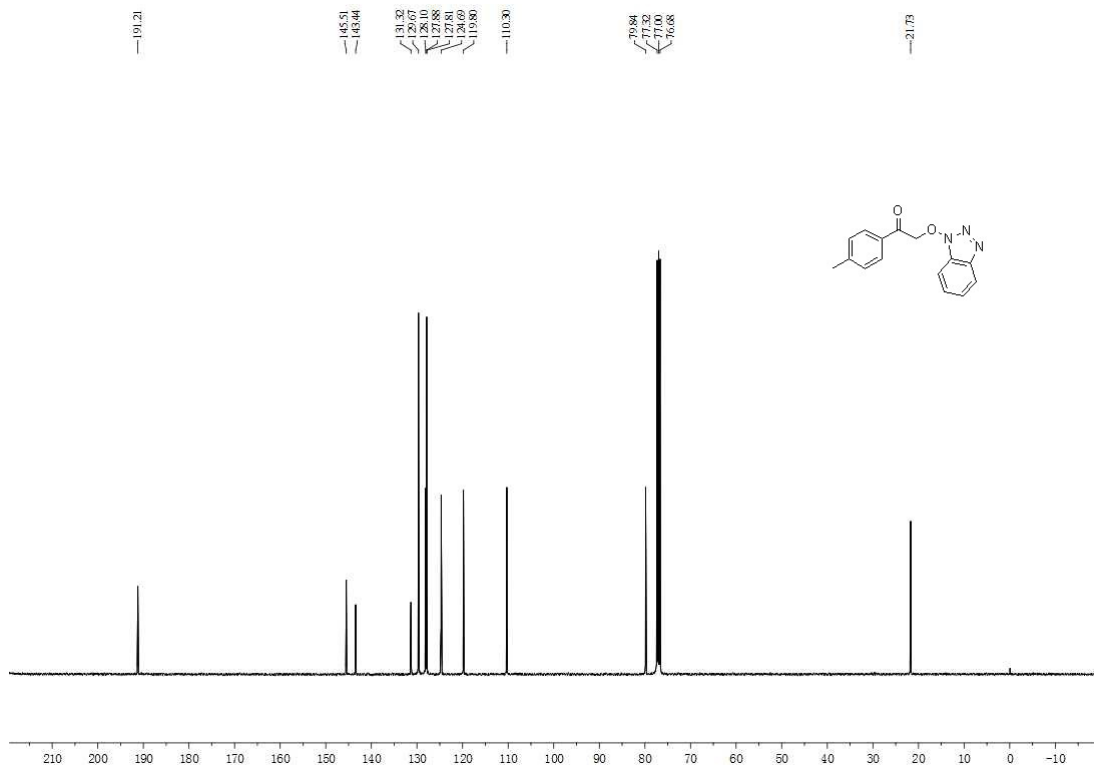

**Product 4j**

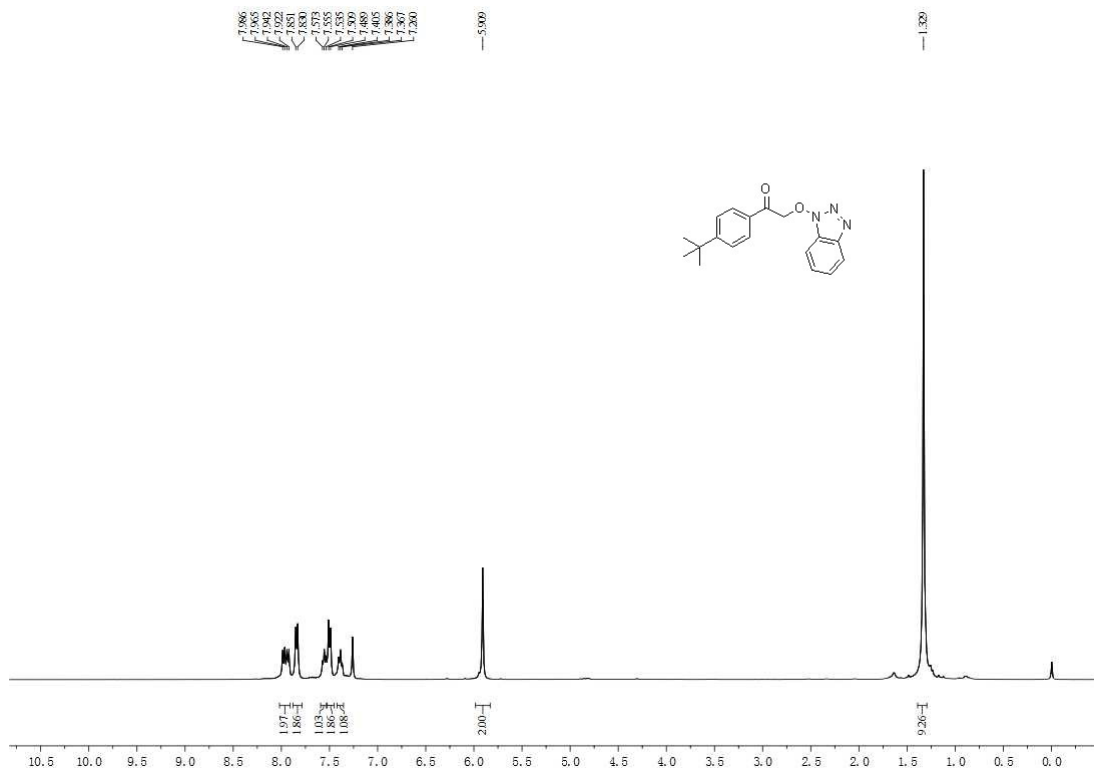

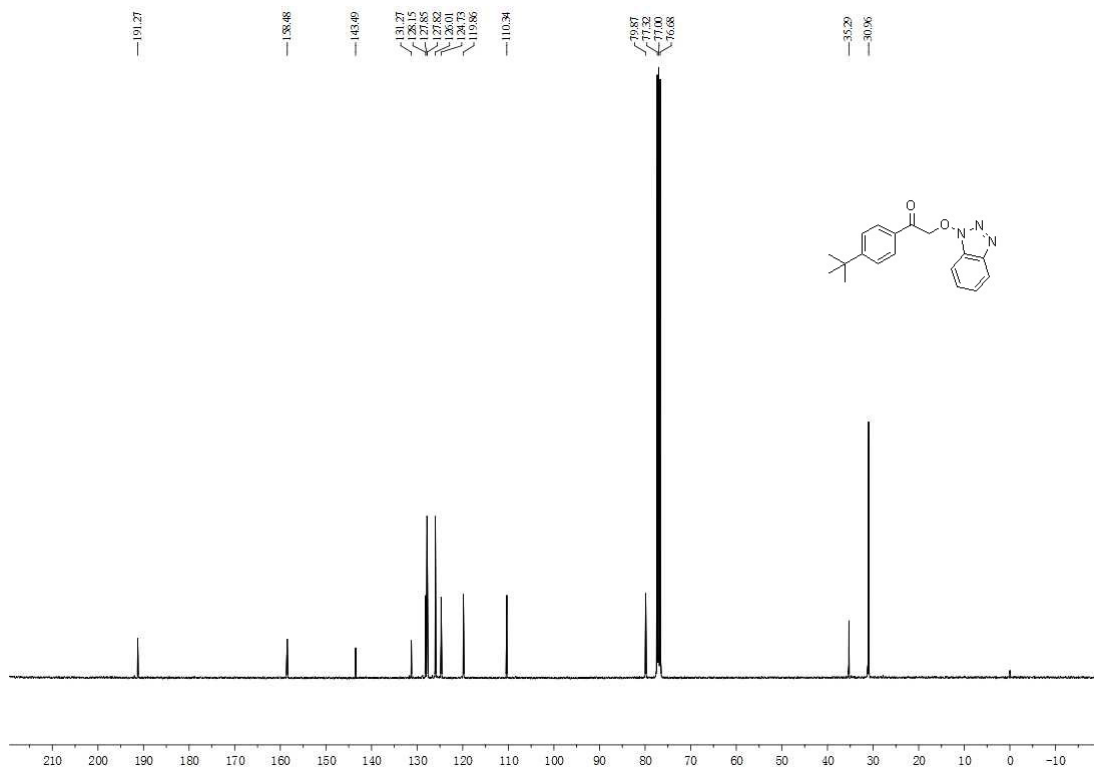

**Product 4k**

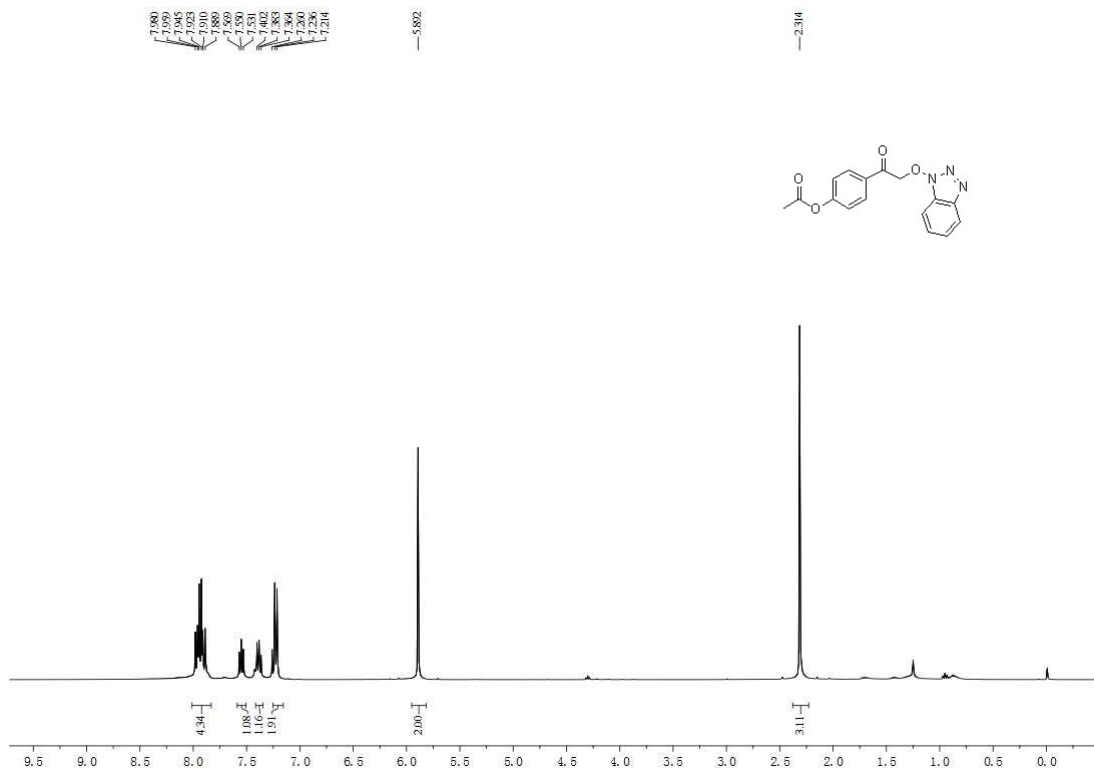

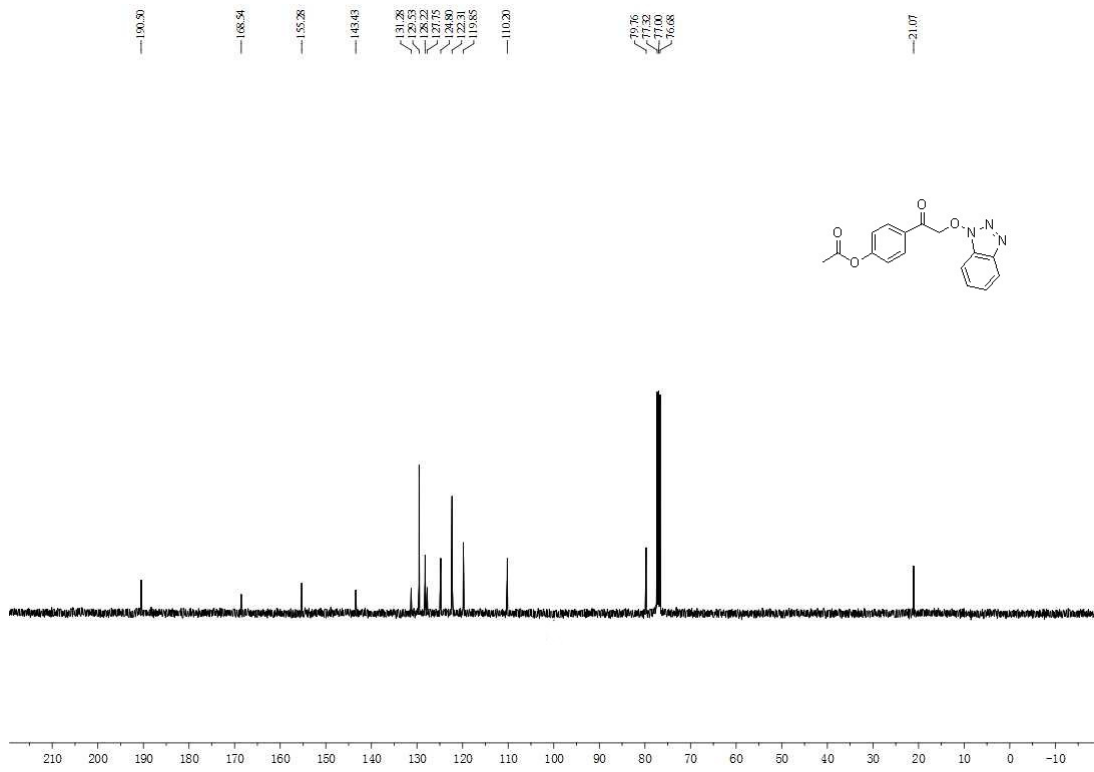

**Product 41**

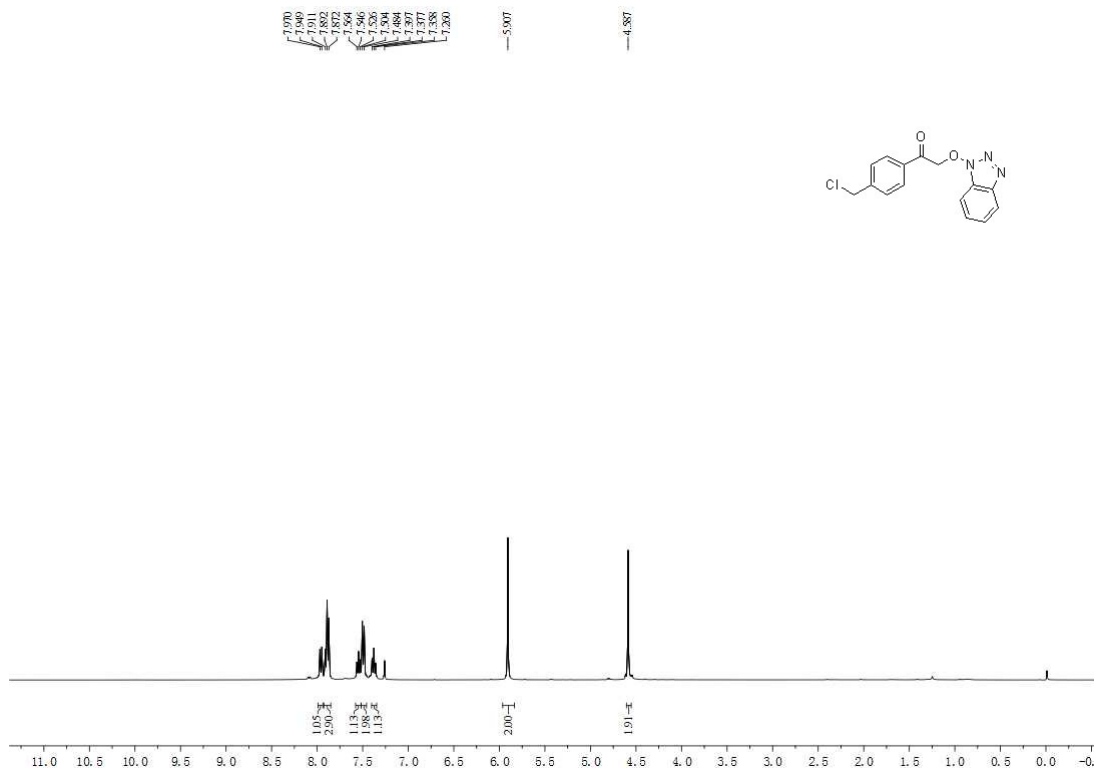

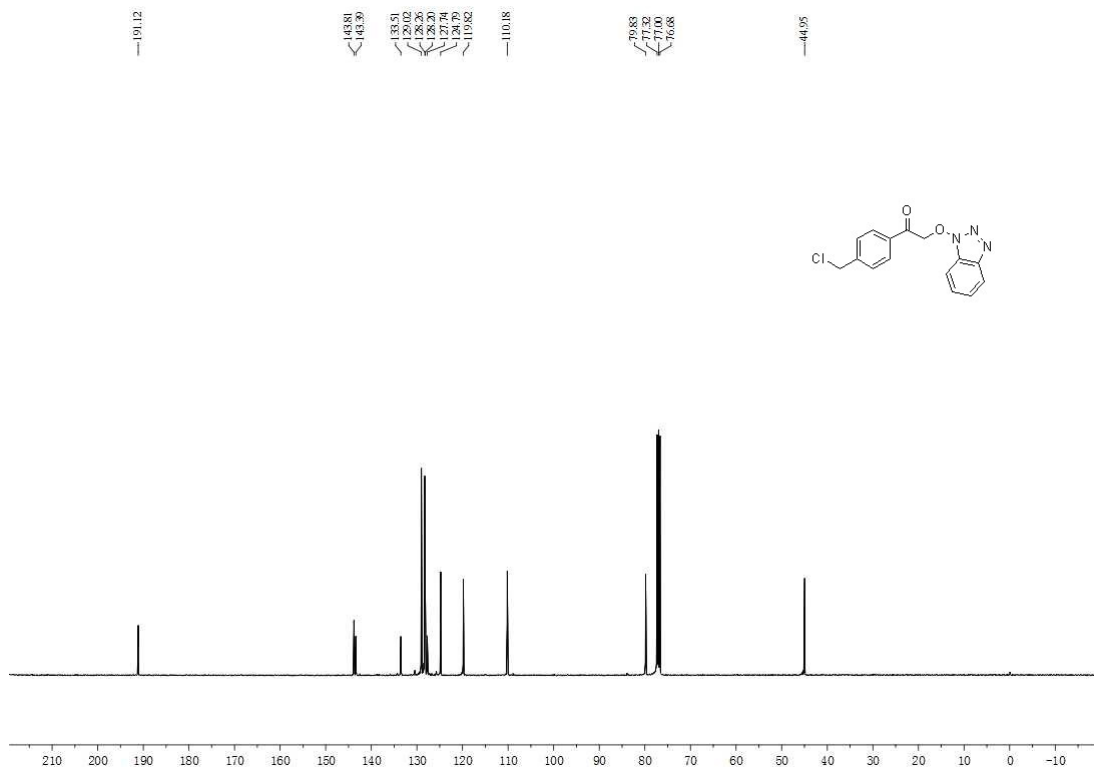

### Product 4m

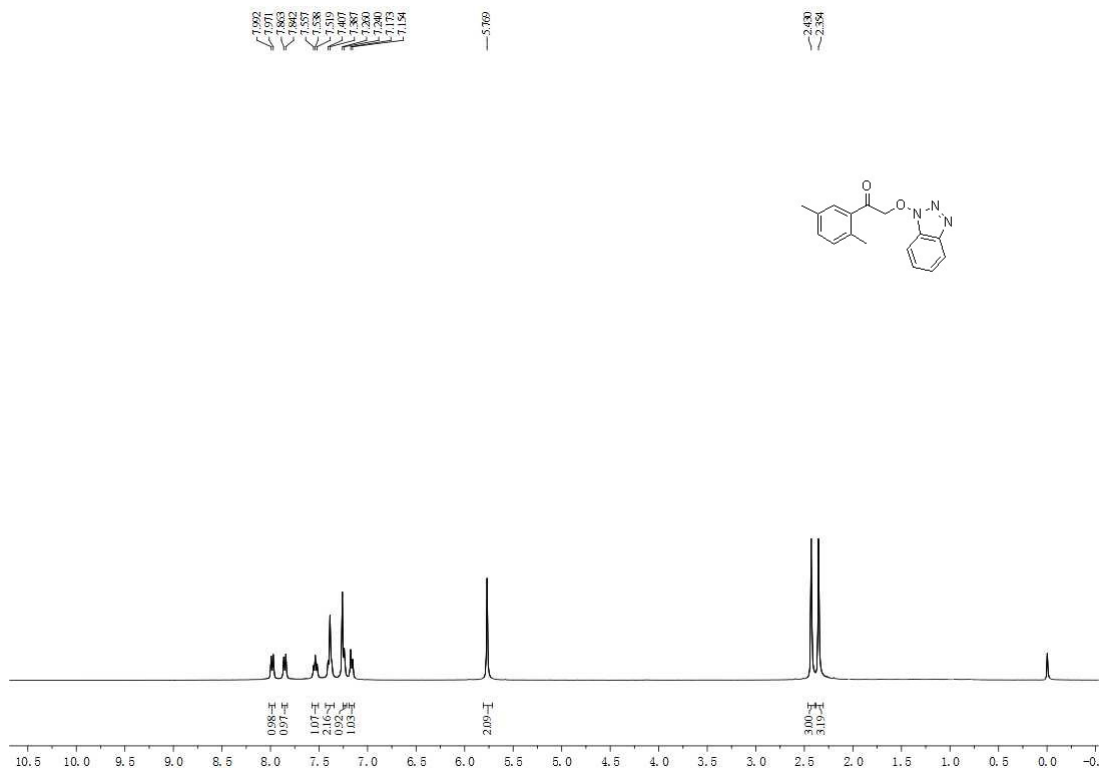

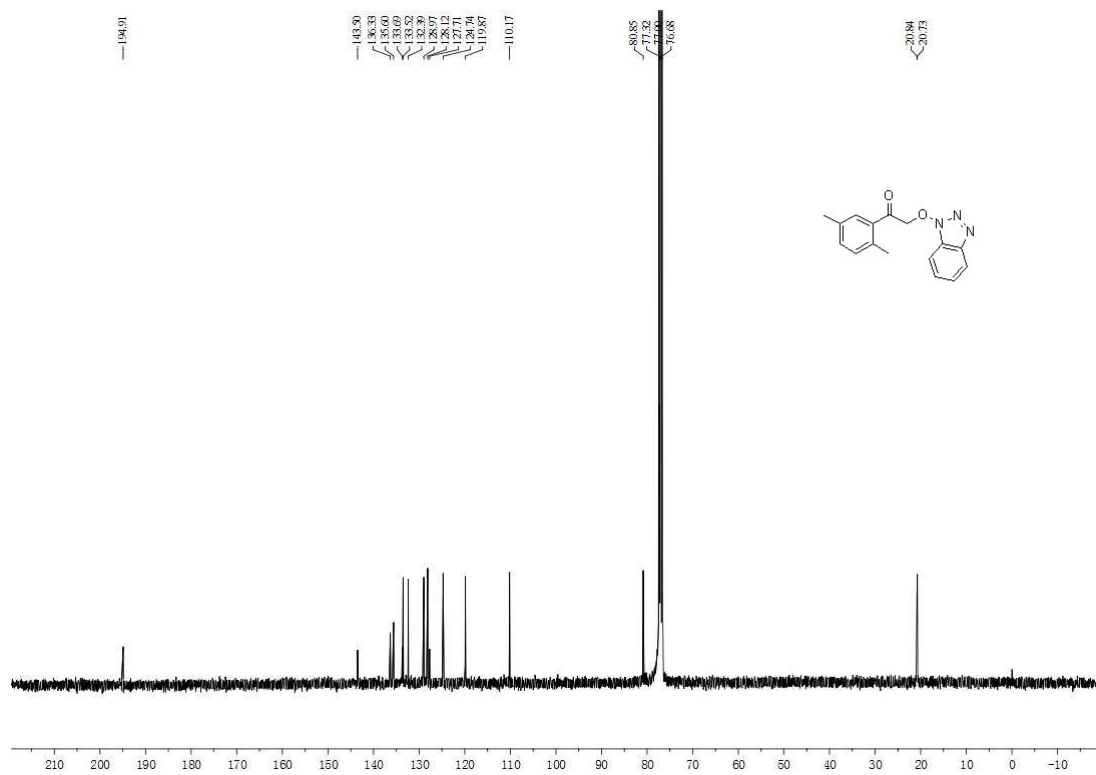

### Product 4n

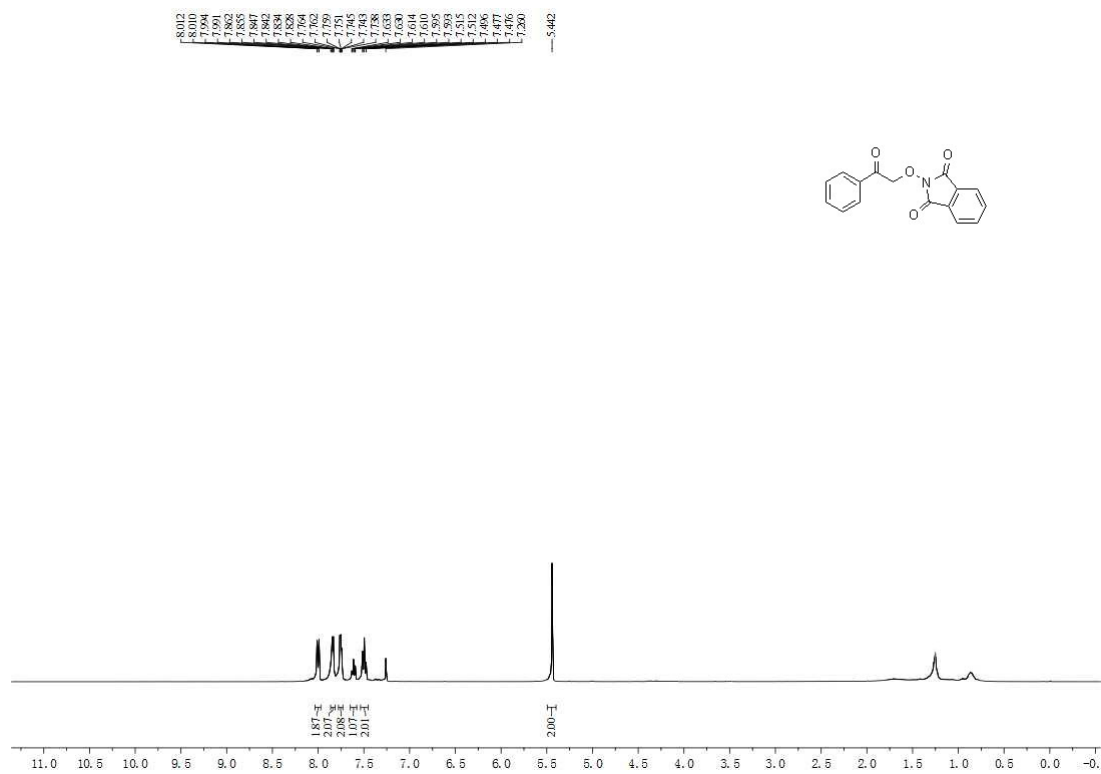

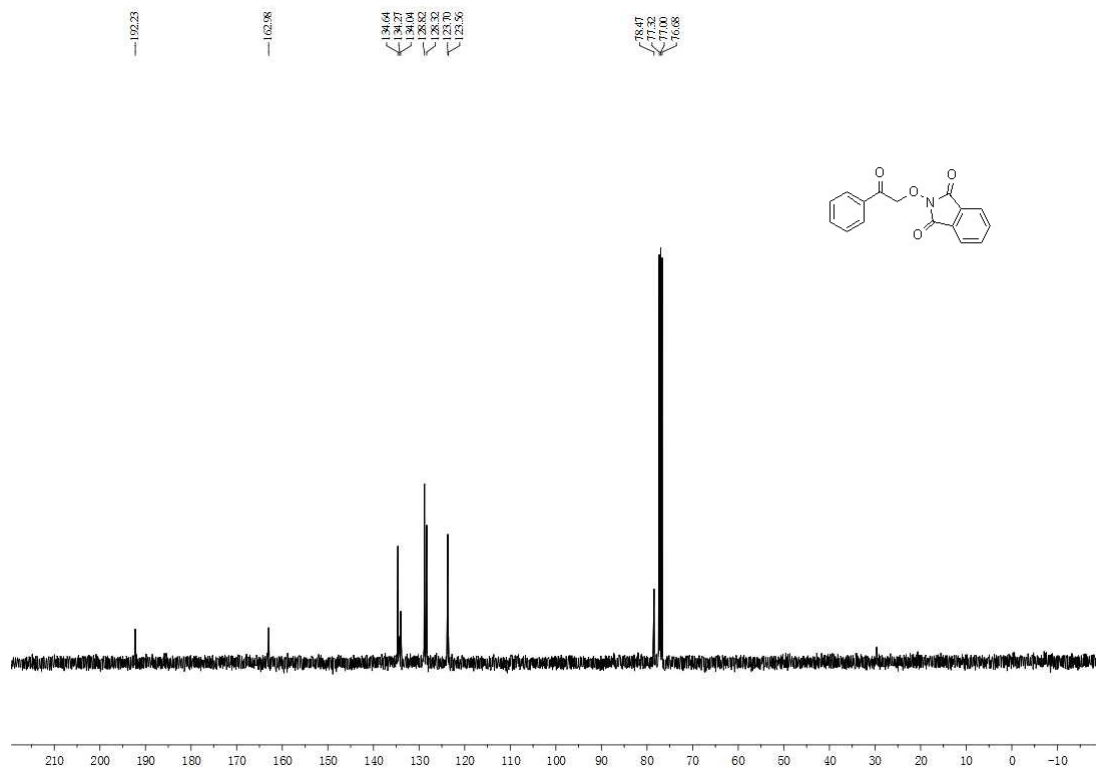

**Product 40**

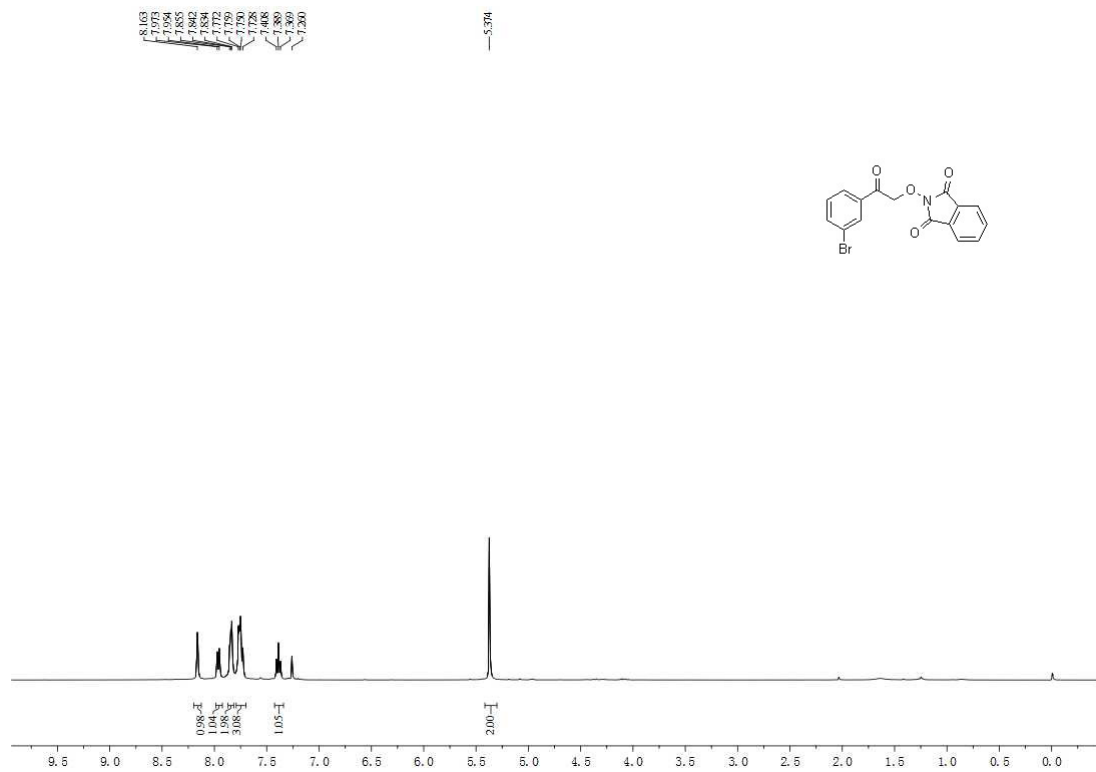



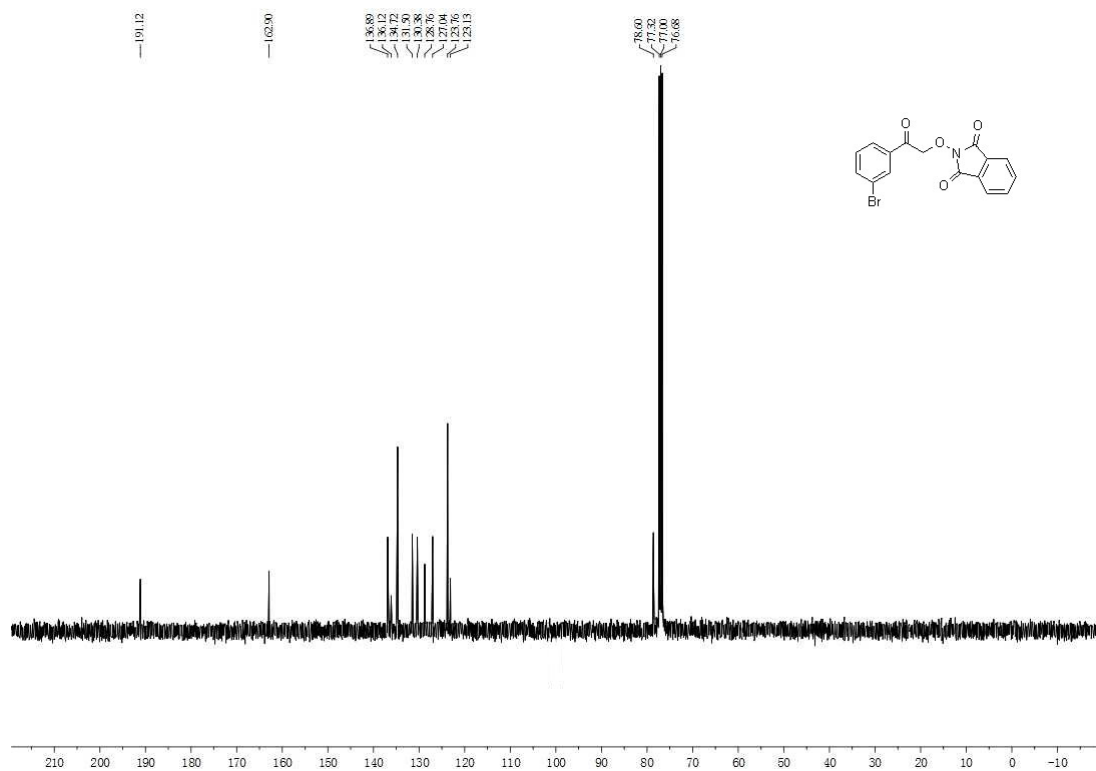

**Product 4p**

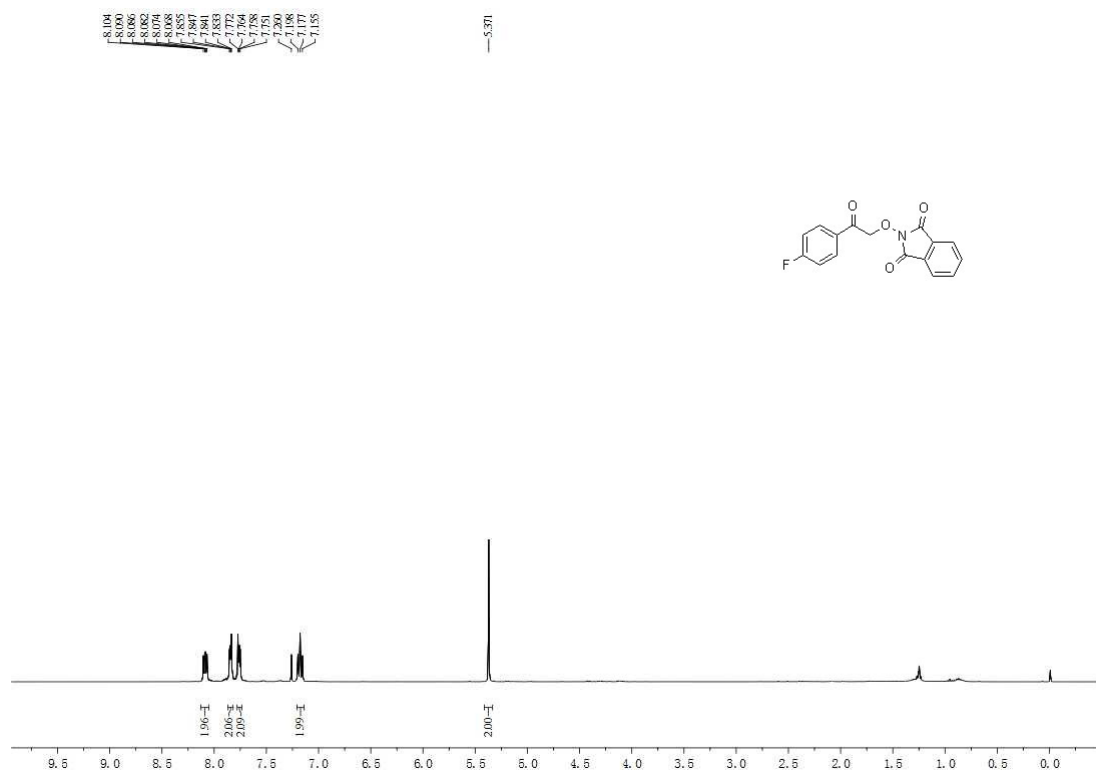

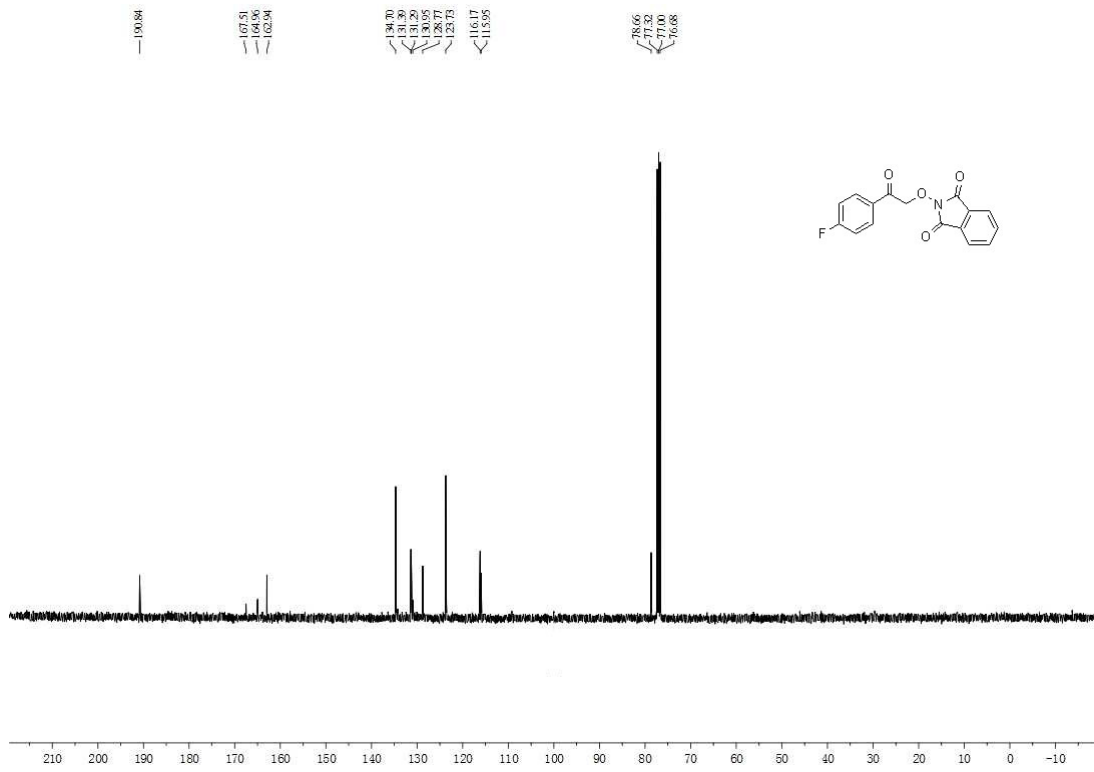

**Product 4q**

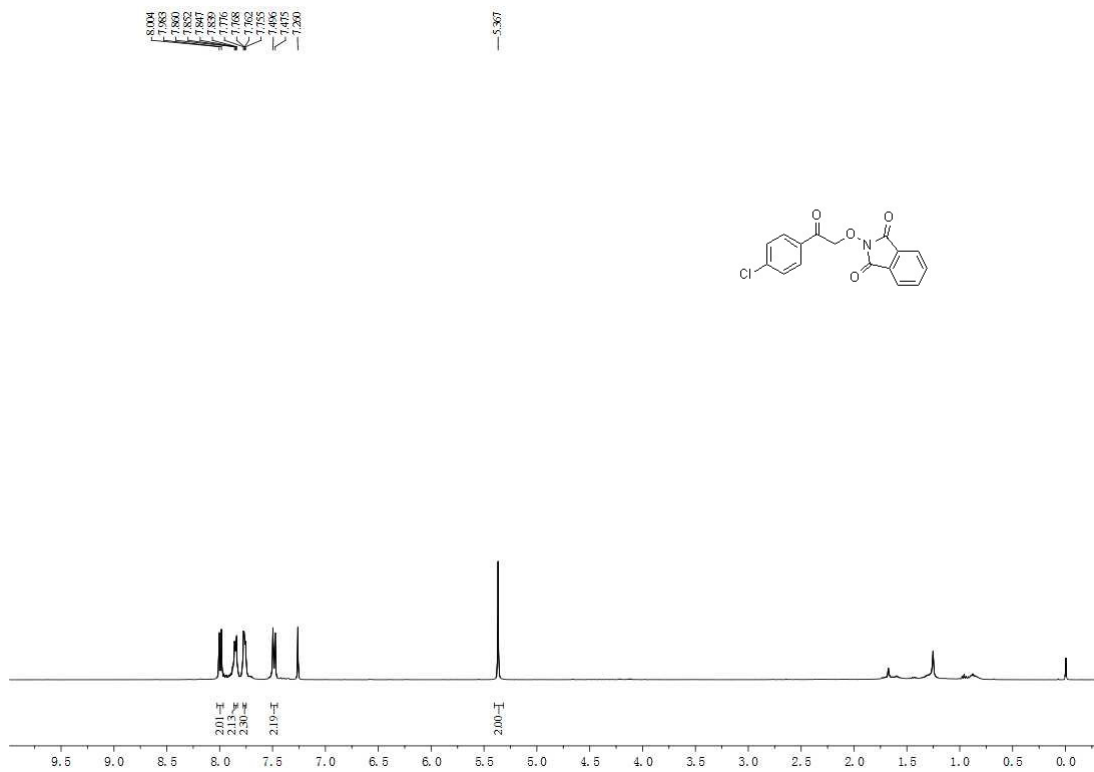



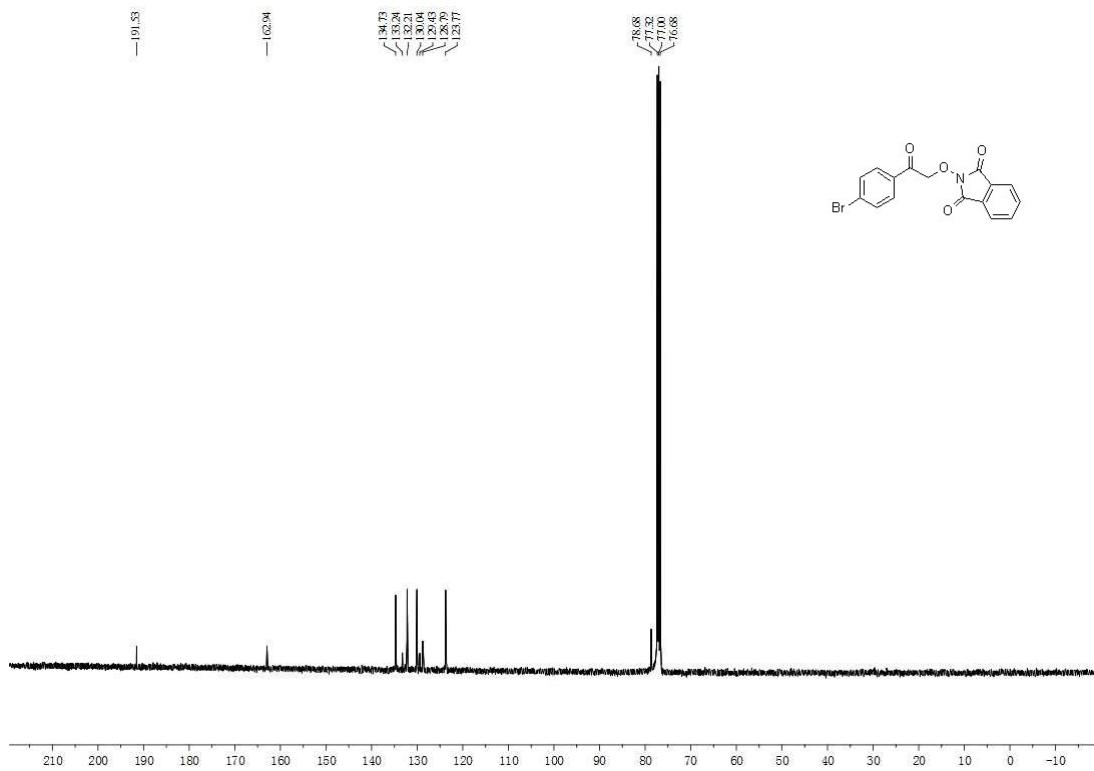

**Product 4s**

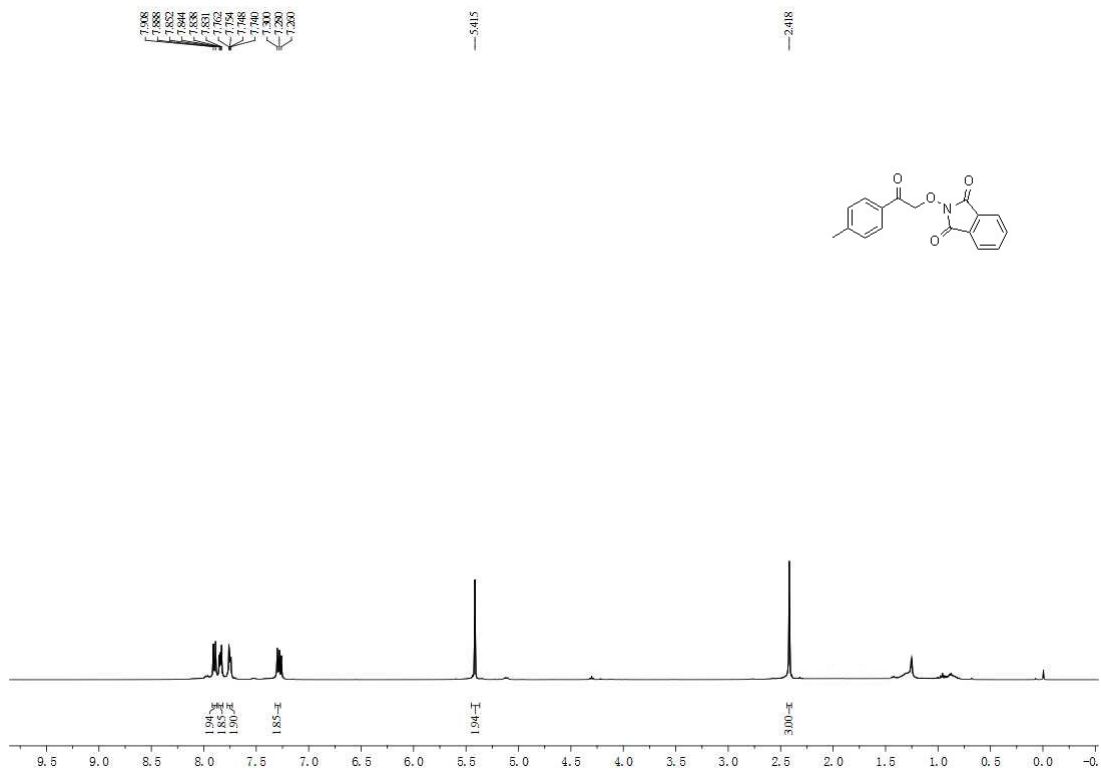

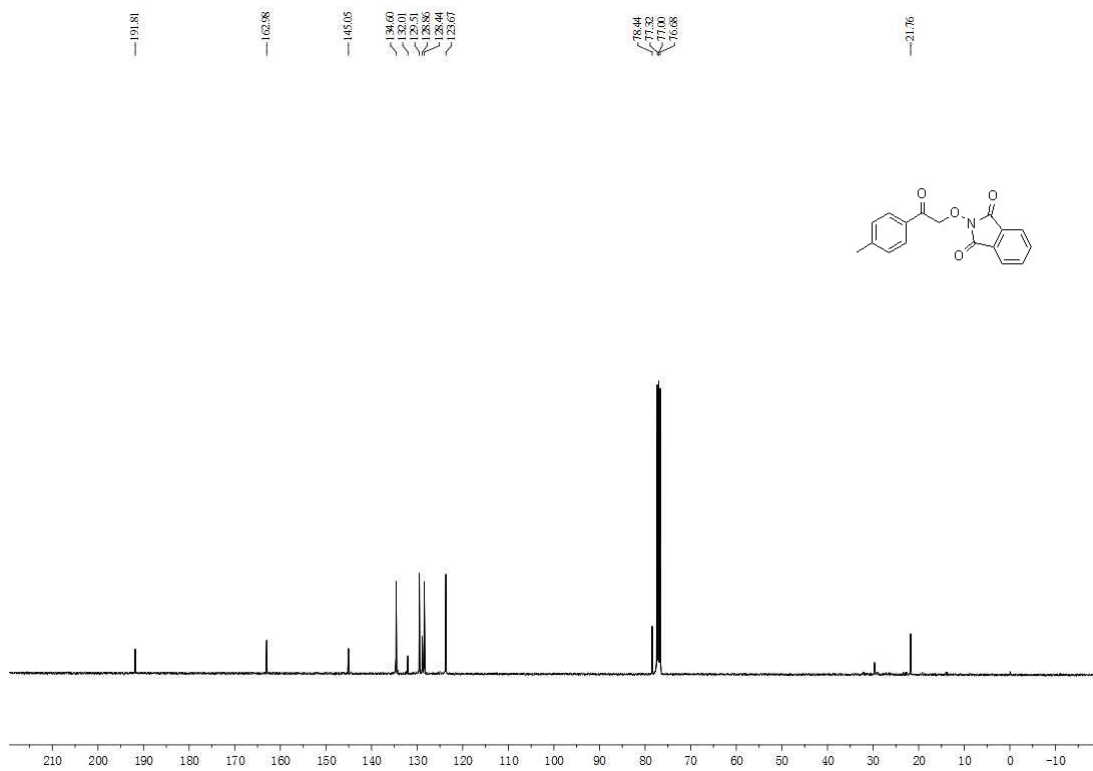

**Product 4t**

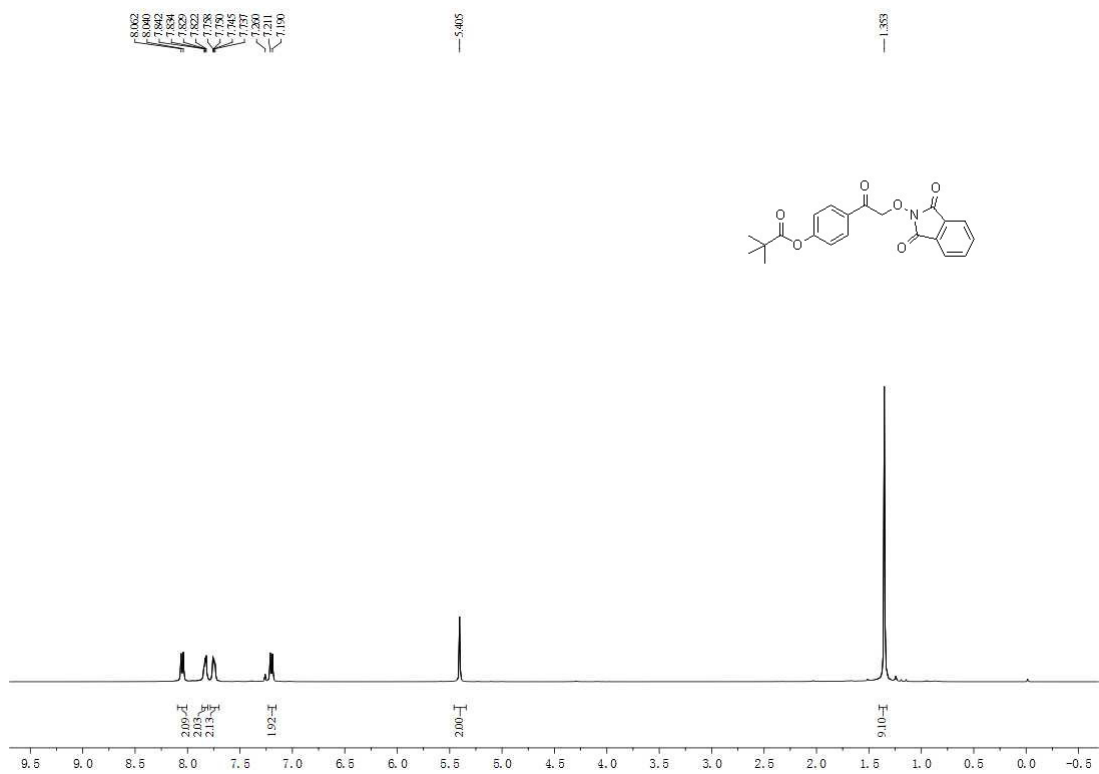

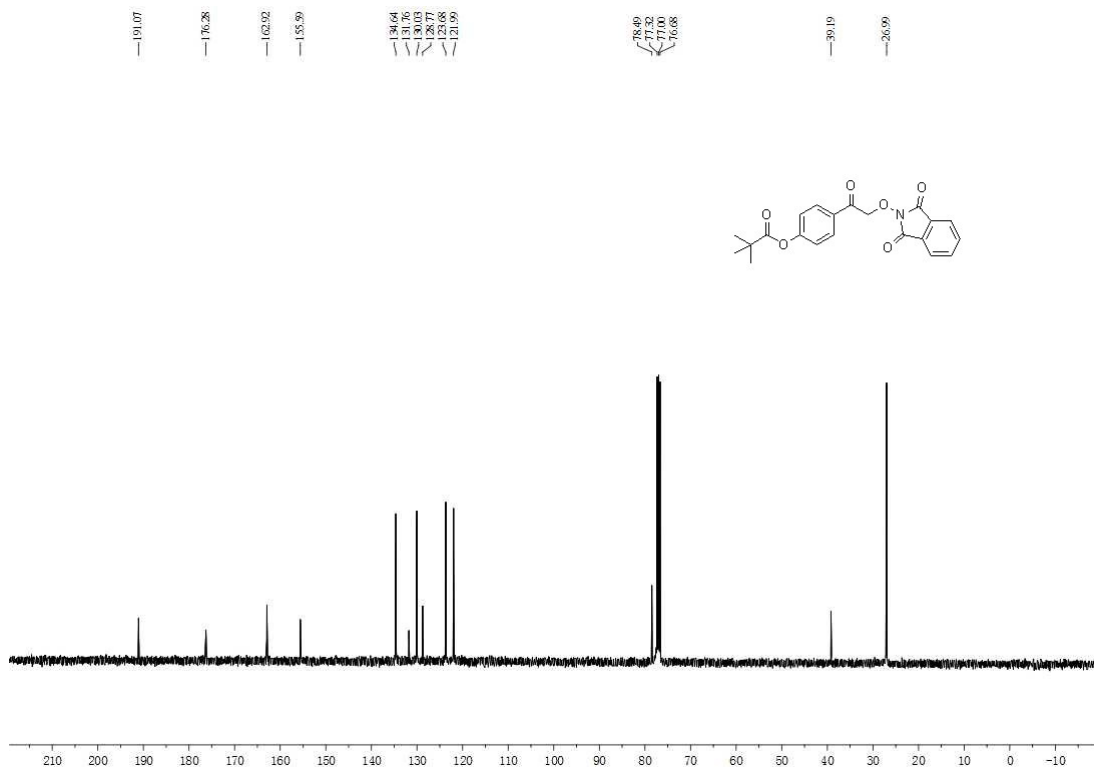

### Product 4u

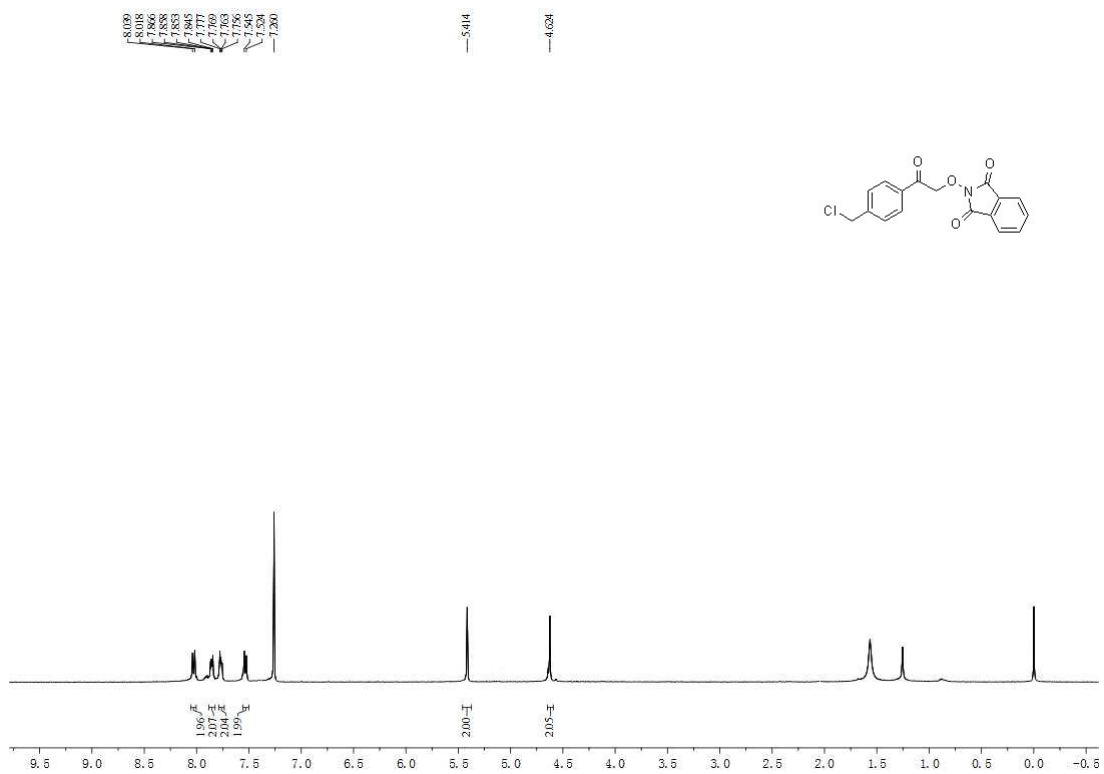

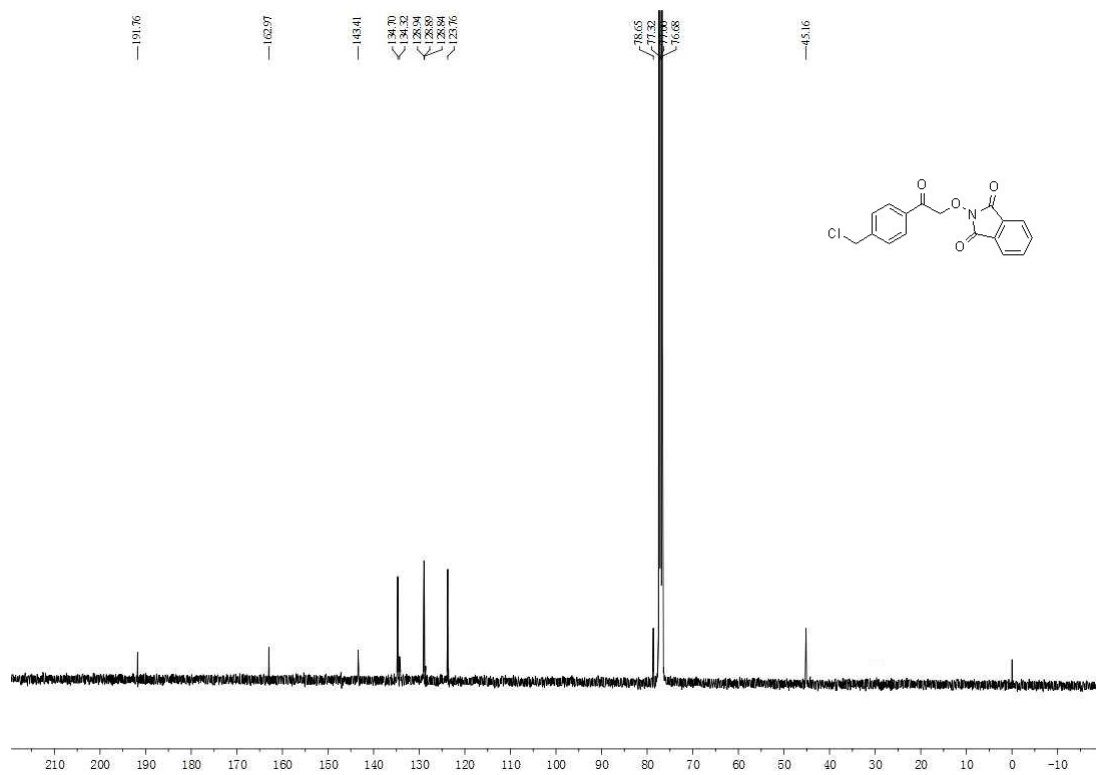

**Product 4v**

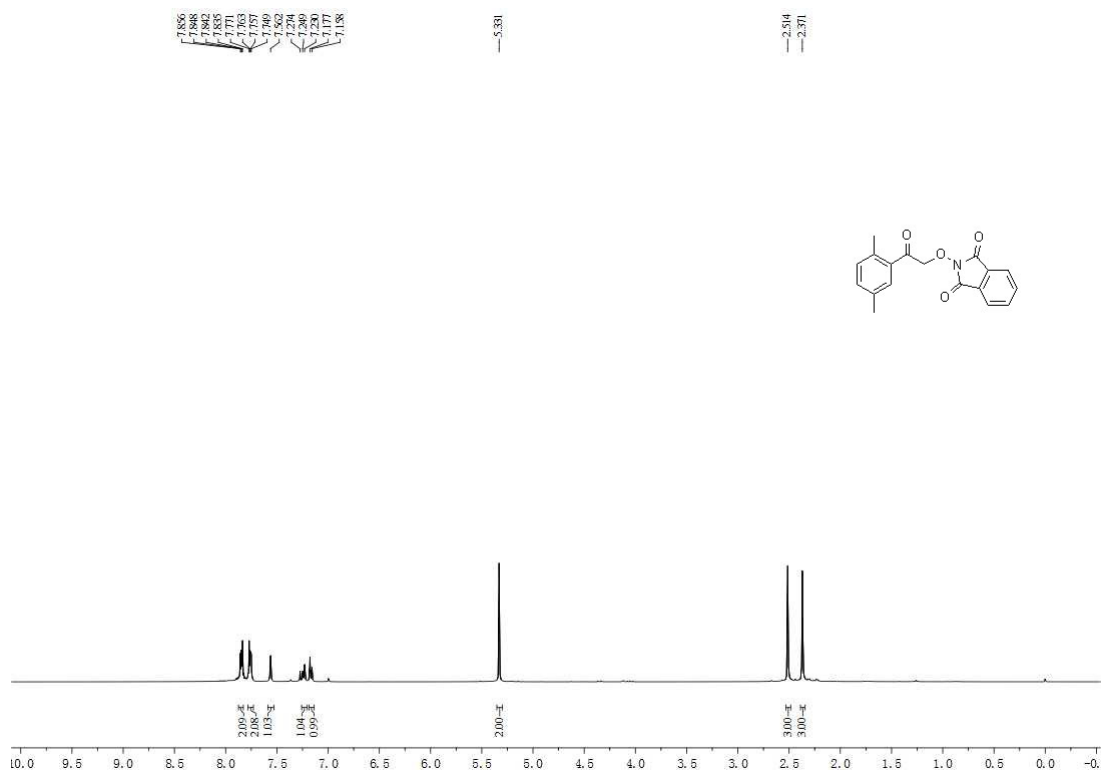

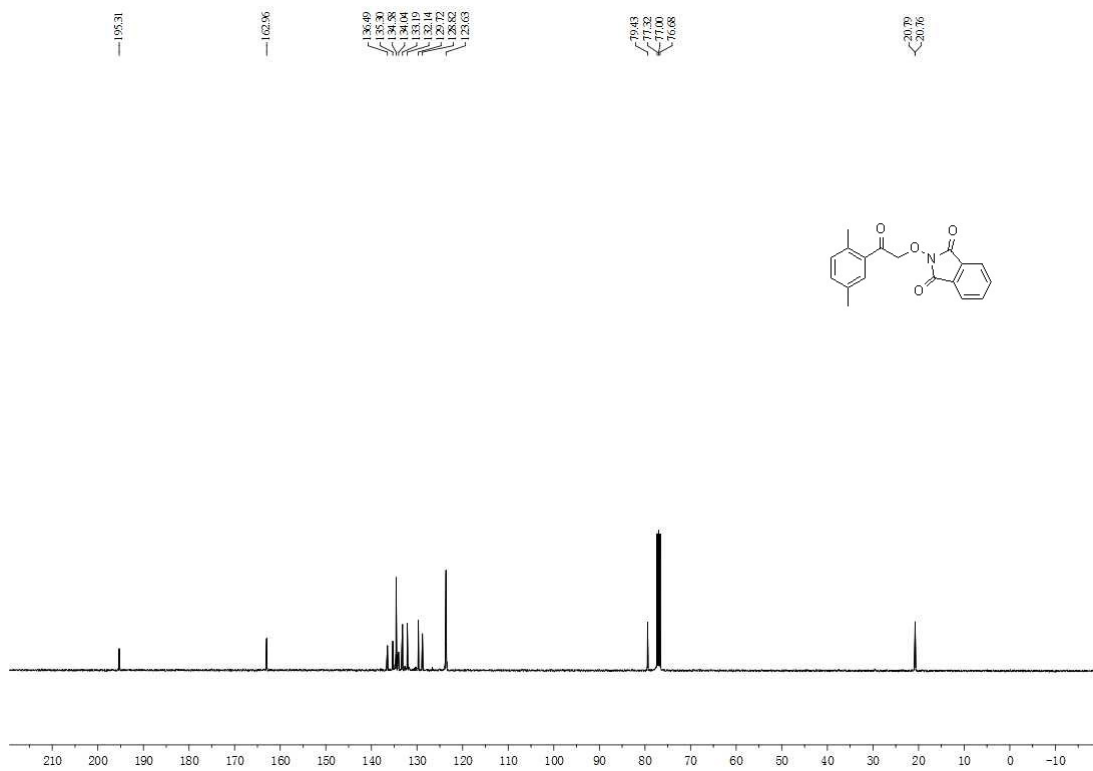

**Product 4w**

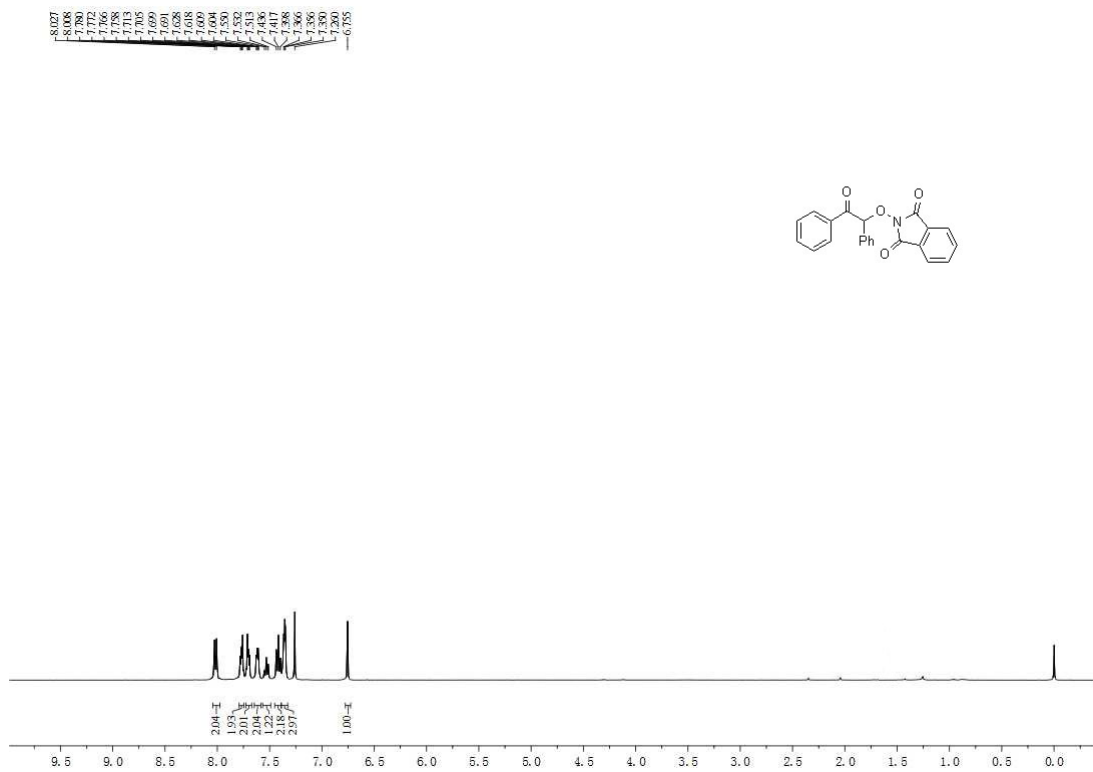



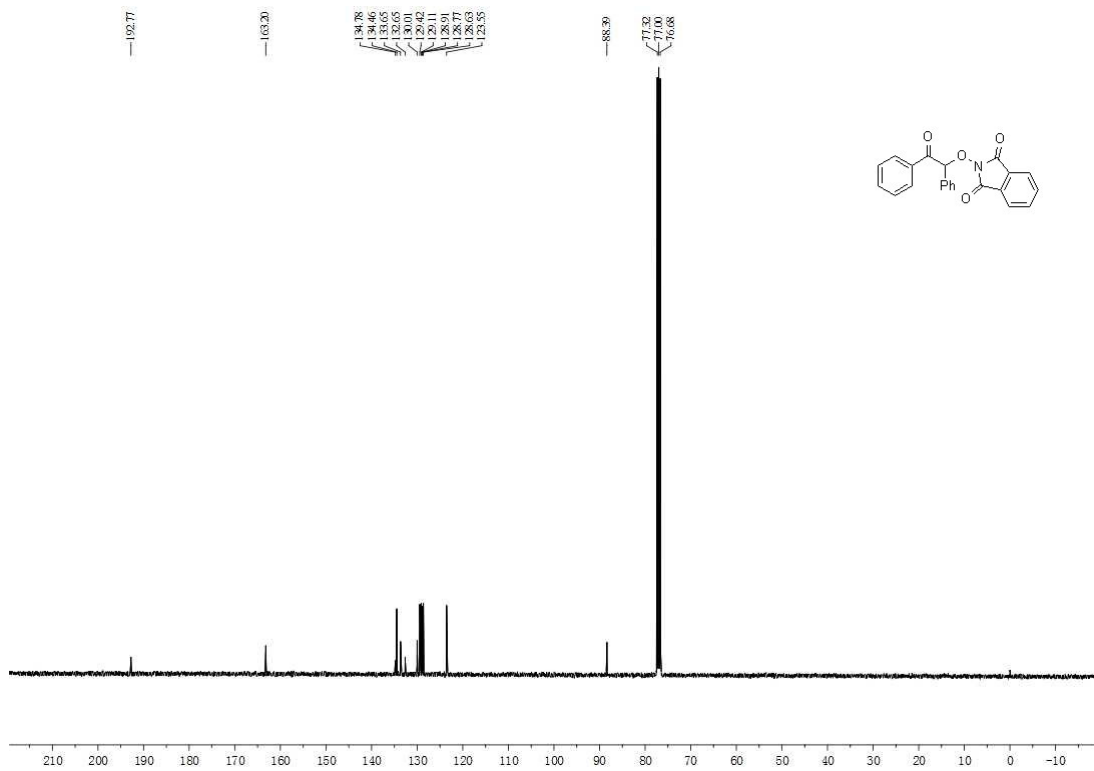

**Product 4x**

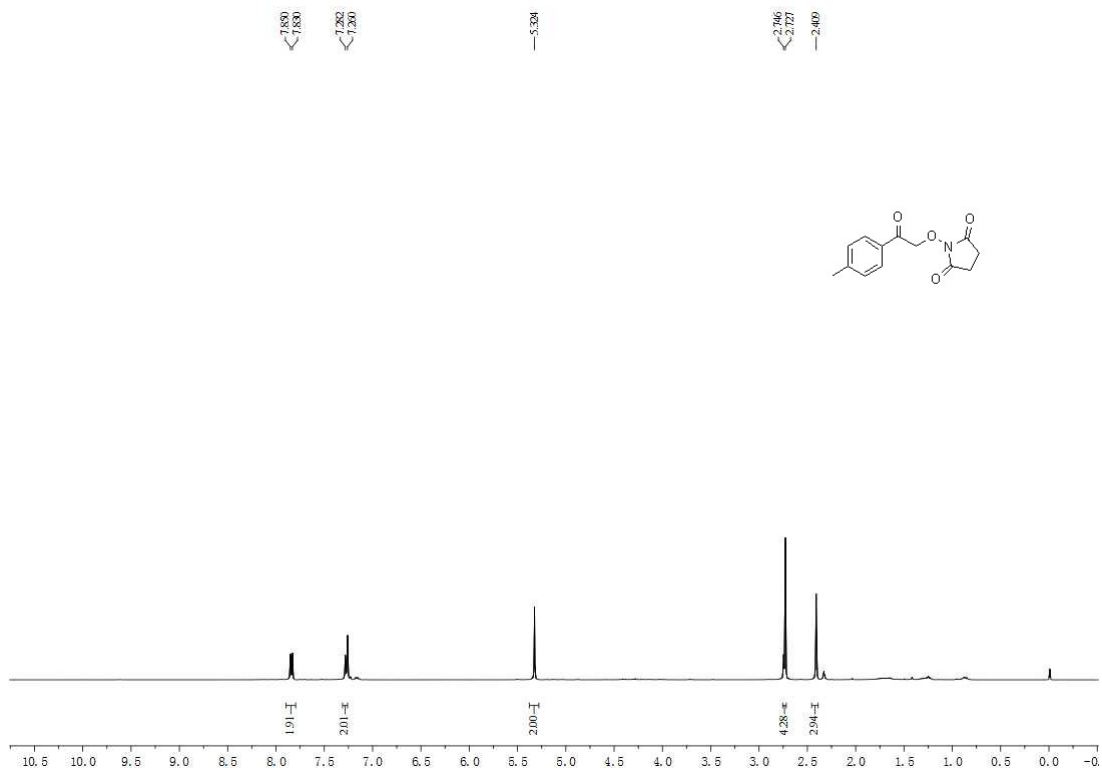

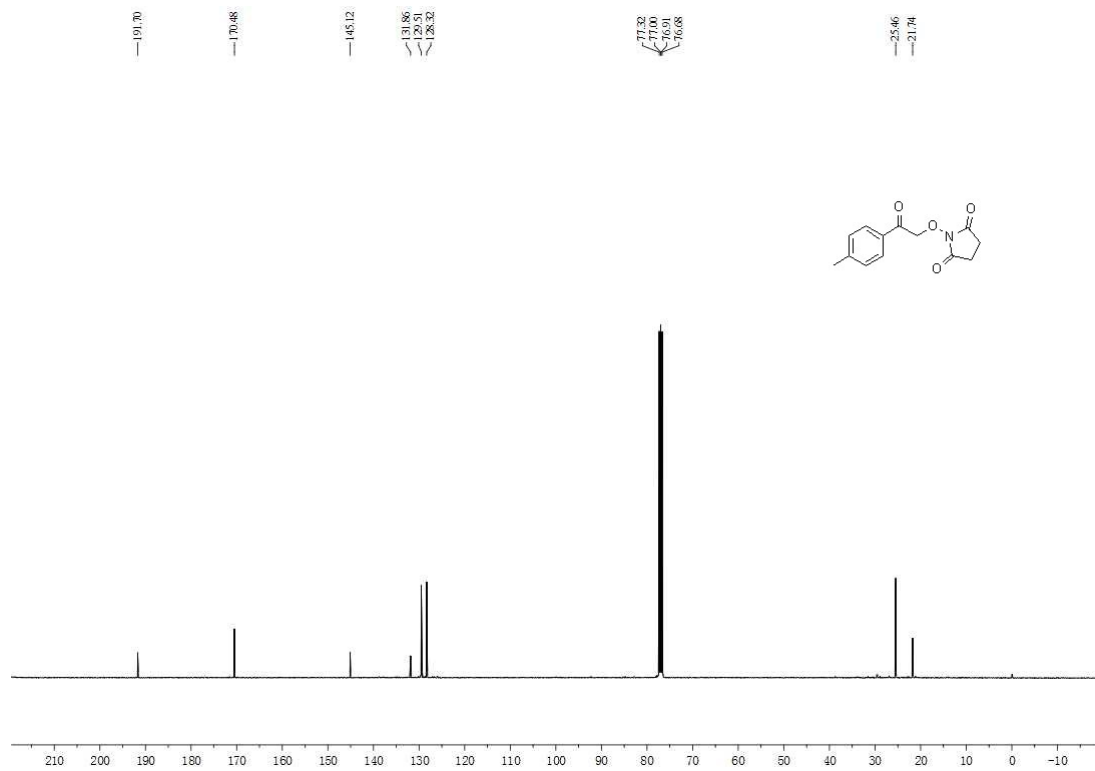

### Product 5

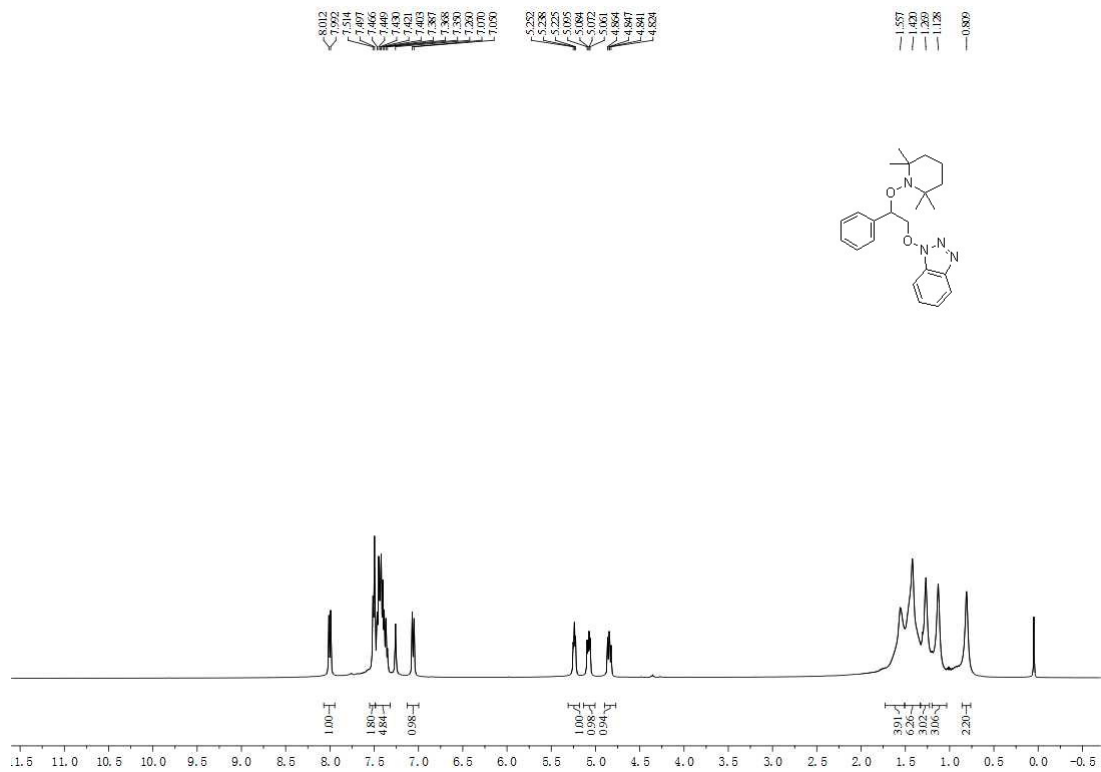

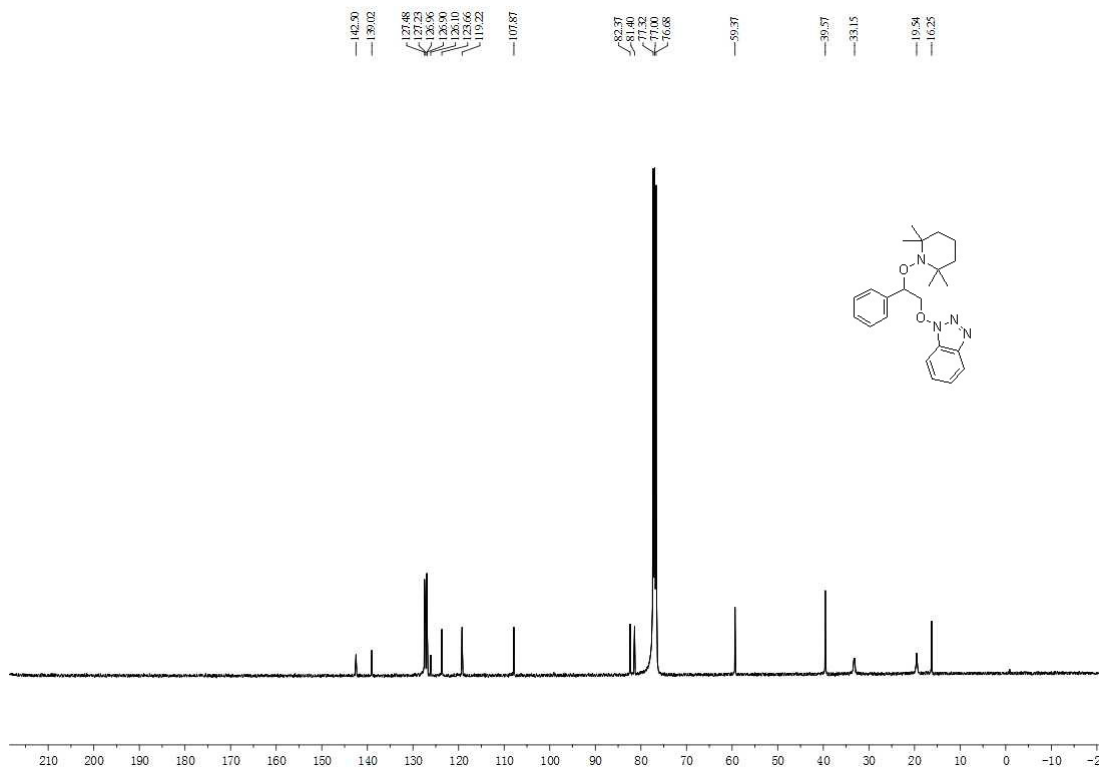

Supplement: c6ra16266e1.pdf [file c6ra16266e1.pdf]
